# Supplementary material for: Genomic islands and the evolution of livestock-associatedStaphylococcus aureusgenomes
Source: Oxford University Press journal article supplement (doi:10.1042/bsr20202287), 2020-11-01
Supplement: bsr-2020-2287_supp.pdf [file bsr-2020-2287_supp.pdf]

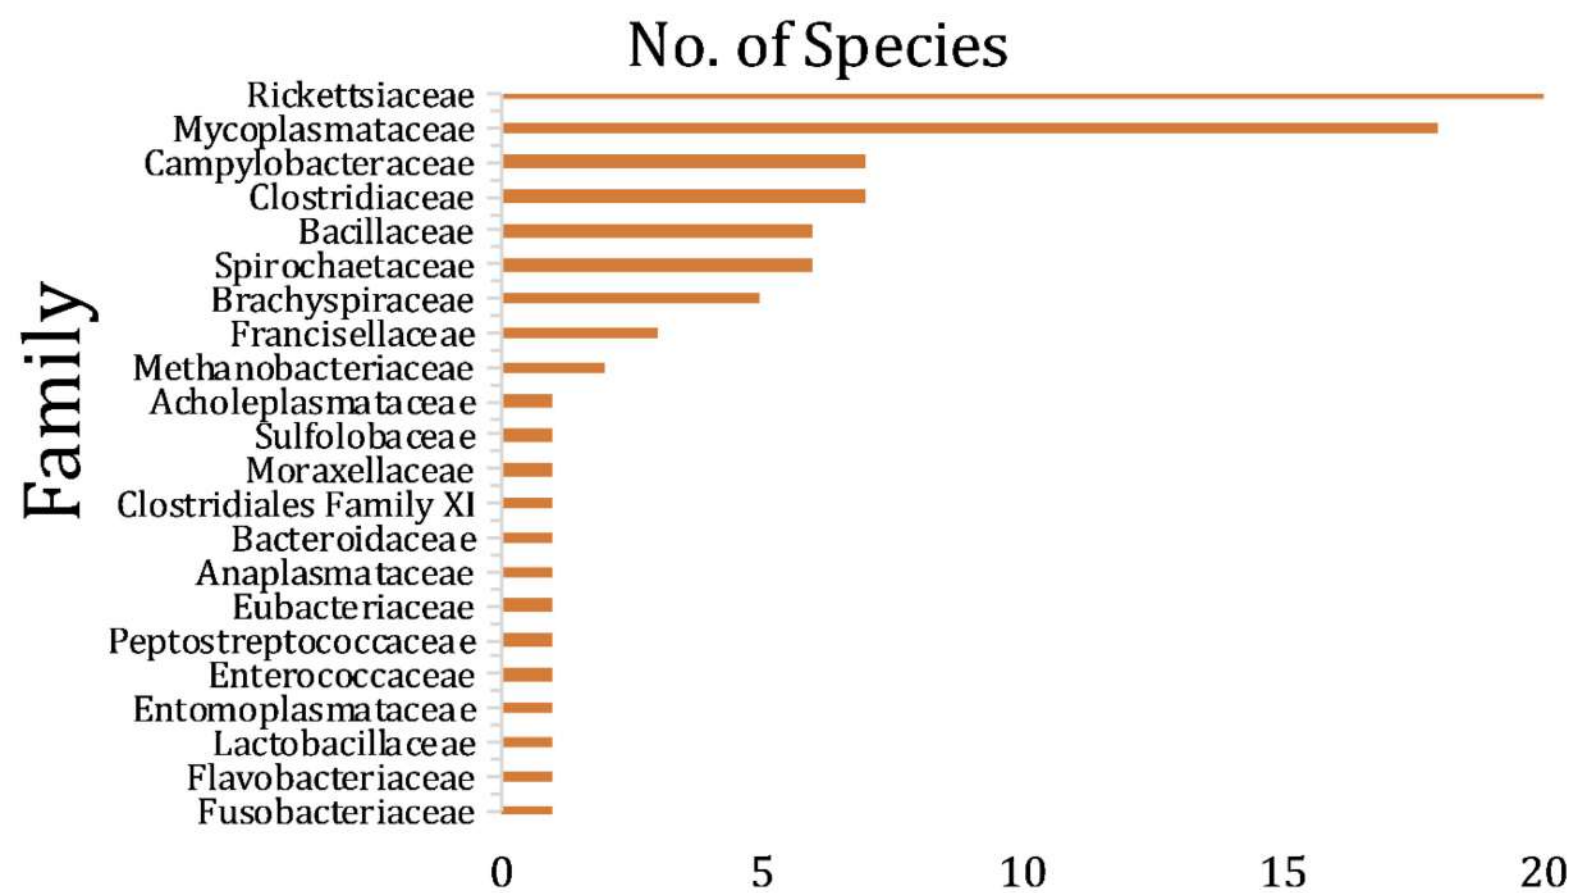

**Figure S1** Categorization of GI element donors based on their family

**Figure S1 Categorization of GI element donors based on their family.** The predicted donors of LA-SA GIs' were grouped as family, and the number of species from that family was represented by the length of bars.

Table S1. General Properties of the 14 Livestock-Associated *Staphylococcus aureus* genomes retrieved from NCBI

| Strain       | Sequence Type | Accession Number | Sequencing Technology          | Host            |
|--------------|---------------|------------------|--------------------------------|-----------------|
| 08BA02176    | ST398         | CP003808         | GS FLX Titanium pyrosequencing | Cattle          |
| 08S00974     | ST398         | CP020019         | Illumina MiSeq                 | Cattle          |
| 71193        | ST398         | CP003045         | Roche genome sequencer         | Cattle          |
| E154         | ST398         | CP013218         | --                             | Chicken         |
| ED98         | ST5           | CP001781         | 454 pyrosequencing             | Chicken         |
| ED133        | ST133         | CP001996         | 454 pyrosequencing             | Small Ruminants |
| ISU935       | ST5           | CP017090         | --                             | Swine           |
| LGA251       | ST130         | FR821779         | 454 pyrosequencing             | Cattle          |
| Newbould_305 | ST115         | AKYW010000       | Illumina HiSeq                 | Cattle          |
| NZ15MR0322   | ST398         | LT699704         | PacBio                         | Cattle          |
| O11          | ST130         | CP024649         | Illumina Genome Analyzer GAII  | Small Ruminants |
| O46          | ST130         | CP025395         | Illumina Genome Analyzer GAII  | Small Ruminants |
| RF122        | ST398         | AJ938182         | Shotgun Sequencing             | Cattle          |
| ST398        | ST398         | AM990992         | Pyrophosphate Sequencing       | Cattle          |

Table S2. Distribution patterns of GIs across the fourteen LA-SA genomes

| GI        | 08BA2176 | 08S974 | 71193 | E154 | ED98 | ED133 | ISU935 | LGA251 | Newboul | NZ1 | O11 | O46 | RF122 | ST398 | GC Content | Mechanism  | Major Contributions                 |
|-----------|----------|--------|-------|------|------|-------|--------|--------|---------|-----|-----|-----|-------|-------|------------|------------|-------------------------------------|
| LASA-G11  | +        | -      | +     | -    | -    | +     | -      | +      | -       | -   | -   | -   | +     | +     | 31.6797477 | Transposon | Immunity and antibiotic resistance  |
| LASA-G12  | +        | -      | +     | -    | -    | -     | -      | -      | -       | -   | -   | -   | -     | -     | 33.7610328 | Phage      | Hypothetical Proteins               |
| LASA-G13  | +        | +      | +     | -    | +    | +     | -      | +      | +       | -   | -   | -   | +     | +     | 32.2944644 | Transposon | Toxins-Pathogenicity                |
| LASA-G14  | +        | +      | -     | +    | -    | +     | +      | +      | -       | +   | -   | -   | -     | -     | 39.6454862 | tRNA       | Folate Synthesis                    |
| LASA-G15  | +        | +      | +     | +    | +    | -     | +      | -      | -       | -   | -   | -   | -     | -     | 30.7276935 | NA         | Virulence                           |
| LASA-G16  | +        | -      | -     | +    | -    | -     | -      | -      | +       | -   | -   | -   | -     | +     | 36.167112  | NA         | Virulence and antibiotic resistance |
| LASA-G17  | +        | -      | +     | -    | +    | +     | -      | +      | +       | -   | -   | -   | +     | +     | 30.1321768 | NA         | Virulence – Adherence               |
| LASA-G18  | +        | -      | -     | -    | -    | -     | -      | -      | -       | -   | -   | -   | -     | -     | 35.7181749 | tRNA       | Virulence                           |
| LASA-G19  | +        | +      | +     | +    | +    | +     | +      | +      | +       | +   | +   | +   | +     | +     | 33.36027   | tRNA       | Antibiotic resistance               |
| LASA-G110 | +        | -      | +     | +    | -    | -     | -      | -      | -       | -   | -   | -   | -     | -     | 29.5847244 | Transposon | NA                                  |
| LASA-G111 | +        | -      | -     | -    | -    | -     | +      | -      | -       | +   | +   | +   | -     | +     | 38.8052363 | NA         | Leucine/isoleucine biosynthesis     |
| LASA-G112 | +        | +      | +     | +    | -    | -     | +      | +      | +       | +   | +   | +   | -     | +     | 37.2816085 | NA         | Virulence – Adherence               |
| LASA-G113 | +        | -      | -     | -    | +    | -     | +      | +      | +       | +   | +   | +   | +     | +     | 34.3597466 | NA         | Virulence – Iron Acquisition        |
| LASA-G114 | +        | -      | +     | +    | +    | -     | +      | +      | +       | +   | +   | +   | +     | +     | 34.3101279 | NA         | Virulence and antibiotic resistance |
| LASA-G115 | -        | +      | +     | +    | -    | +     | -      | +      | -       | +   | -   | -   | -     | +     | 31.205944  | NA         | Virulence – Adherence               |
| LASA-G116 | -        | +      | +     | +    | +    | +     | +      | +      | +       | +   | +   | +   | -     | +     | 39.9966572 | NA         | Virulence and antibiotic resistance |
| LASA-G117 | -        | +      | -     | -    | -    | -     | -      | -      | -       | -   | -   | -   | -     | -     | 30.64652   | Phage      | Hypothetical Proteins               |
| LASA-G118 | -        | +      | -     | +    | -    | -     | -      | -      | -       | +   | -   | +   | -     | -     | 36.5712591 | NA         | Antibiotic resistance               |
| LASA-G119 | -        | -      | +     | +    | +    | +     | +      | +      | +       | +   | +   | +   | +     | -     | 37.2173272 | Phage      | Hypothetical Proteins               |
| LASA-G120 | -        | -      | -     | +    | -    | -     | +      | -      | -       | -   | -   | +   | +     | -     | 39.6322739 | tRNA       | Trehalose metabolism                |
| LASA-G121 | -        | -      | -     | -    | +    | -     | -      | -      | -       | -   | -   | -   | -     | -     | 26.8541583 | NA         | Antibiotic resistance               |
| LASA-G122 | -        | -      | -     | -    | +    | +     | -      | -      | -       | +   | -   | -   | -     | -     | 36.8922605 | Transposon | Hypothetical Proteins               |
| LASA-G123 | -        | -      | -     | -    | +    | +     | -      | +      | +       | -   | +   | -   | -     | -     | 40.0605816 | NA         | Virulence – Toxins                  |
| LASA-G124 | -        | -      | -     | -    | +    | -     | +      | -      | +       | -   | -   | -   | -     | -     | 32.0237296 | Phage      | Hypothetical Proteins               |
| LASA-G125 | -        | -      | -     | -    | +    | -     | -      | -      | -       | -   | -   | -   | -     | -     | 30.7045269 | NA         | NA                                  |
| LASA-G126 | -        | -      | -     | -    | +    | -     | -      | -      | -       | -   | -   | -   | -     | -     | 34.6094074 | tRNA       | Virulence – Toxins                  |
| LASA-G127 | -        | -      | -     | -    | -    | +     | -      | -      | -       | -   | -   | -   | -     | -     | 29.8438981 | Phage      | Hypothetical Proteins               |
| LASA-G128 | -        | -      | -     | -    | -    | +     | -      | -      | -       | -   | -   | -   | -     | -     | 35.1715317 | Phage      | Toxins-Pathogenicity                |
| LASA-G129 | -        | -      | -     | -    | -    | -     | +      | -      | -       | -   | -   | -   | -     | -     | 29.8652591 | NA         | Toxins-Pathogenicity                |
| LASA-G130 | -        | -      | -     | -    | -    | -     | +      | +      | -       | -   | -   | -   | -     | -     | 35.3210565 | Transposon | Virulence and antibiotic resistance |
| LASA-G131 | -        | -      | -     | -    | -    | -     | -      | +      | -       | -   | -   | -   | -     | -     | 37.1447325 | NA         | NA                                  |
| LASA-G132 | -        | -      | -     | -    | -    | -     | -      | -      | +       | -   | -   | -   | -     | -     | 40.4467135 | Transposon | NA                                  |
| LASA-G133 | -        | -      | -     | -    | -    | -     | -      | -      | +       | -   | -   | -   | -     | -     | 31.2197022 | NA         | Hypothetical Proteins               |
| LASA-G134 | -        | -      | -     | -    | -    | -     | -      | -      | +       | -   | -   | -   | -     | -     | 34.989423  | NA         | NA                                  |
| LASA-G135 | -        | -      | -     | -    | -    | -     | -      | -      | +       | -   | -   | -   | -     | -     | 35.1886396 | Transposon | Virulence                           |
| LASA-G136 | -        | -      | -     | -    | -    | -     | -      | -      | -       | +   | -   | +   | -     | +     | 30.722953  | Phage      | Hypothetical Proteins               |
| LASA-G137 | -        | -      | -     | -    | -    | -     | -      | -      | -       | -   | +   | -   | -     | -     | 36.8259804 | Transposon | Toxins-Pathogenicity                |
| LASA-G138 | -        | -      | -     | -    | -    | -     | -      | -      | -       | -   | +   | -   | -     | +     | 30.2064079 | NA         | Metabolism related                  |
| LASA-G139 | -        | -      | -     | -    | -    | -     | -      | -      | -       | -   | -   | +   | -     | -     | 35.419869  | Transposon | Metabolism related                  |
| LASA-G140 | -        | -      | -     | -    | -    | -     | -      | -      | -       | -   | -   | -   | +     | -     | 35.8041138 | NA         | Virulence                           |
| LASA-G141 | -        | -      | -     | -    | -    | -     | -      | -      | -       | -   | -   | -   | +     | -     | 31.1702718 | NA         | Hypothetical Proteins               |
| LASA-G142 | -        | -      | -     | -    | -    | -     | -      | -      | -       | -   | -   | -   | +     | -     | 29.6798588 | Transposon | Virulence                           |
| LASA-G143 | -        | -      | -     | -    | -    | -     | -      | -      | -       | -   | -   | -   | +     | -     | 30.295941  | NA         | Virulence – Adherence               |
| LASA-G144 | -        | -      | -     | -    | -    | -     | -      | -      | -       | -   | -   | -   | +     | -     | 35.8607324 | Transposon | Metabolism related                  |
| LASA-G145 | -        | -      | -     | -    | -    | -     | -      | -      | -       | -   | -   | -   | -     | +     | 40.7430506 | Transposon | Hypothetical Proteins               |
| LASA-G146 | -        | -      | -     | -    | -    | -     | -      | -      | -       | -   | -   | -   | -     | +     | 37.5417913 | Phage      | Hypothetical Proteins               |

Table S3 Virulent genes associated with predicted Gis of *LASA'* genomes

| Protein ID                                                                                                                                           | VFDB Accession No.         | Related genes | Virulence Factors                                         | VF Class         |
|------------------------------------------------------------------------------------------------------------------------------------------------------|----------------------------|---------------|-----------------------------------------------------------|------------------|
| ACY11319.1; ACY11320.1; ACY11321.1; AFR3846.1; ATV04656.1; CAI80978.1; CAI80979.1; CAI80980.1; CAI80981.1; CAI80982.1; CAI80989.1; SaureusN305_02140 | VFG004506(gi:15927015)     | <i>ebh</i>    | Cell wall associated fibronectin binding protein          | Adherence        |
| ACY12392.1; AFR73793.1; ASC52031.1; SaureusN305_00371; SaureusN305_02431                                                                             | VFG043588(gi:57651004)     | <i>sasG</i>   | cell wall surface anchor family protein                   |                  |
| AFR72873.1; ASC50323.1; CAI80432.1; SaureusN305_01293; YP_005733664.1                                                                                | VFG004638(gi:87160156)     | <i>clfA</i>   | Clumping factor A                                         |                  |
| AFR73178.1                                                                                                                                           | VFG004496(gi:49483319)     | <i>efb</i>    | Fibrinogen binding protein                                |                  |
| AFR74495.1                                                                                                                                           | VFG001283(gb/NP_647238)    | <i>fmbA</i>   | Fibronectin binding proteins                              |                  |
| AFR74492.1; AFR74494.1; ATV04655.1; SaureusNZMR0322_02541; SaureusNZMR0322_02542                                                                     | VFG004615(gi:15928081)     | <i>fmbB</i>   |                                                           |                  |
| Saureus08S00974_00548                                                                                                                                | VFG004606(gi:49482791)     | <i>sdrC</i>   |                                                           |                  |
| Saureus08S00974_00549                                                                                                                                | VFG017111(gi:148267022)    | <i>sdrD</i>   | Ser-Asp rich fibrinogen-binding proteins                  |                  |
| Saureus08S00974_00550                                                                                                                                | VFG017226(gi:151220737)    | <i>sdrE</i>   |                                                           |                  |
| AFR72875.1                                                                                                                                           | VFG002418(gb/YP_001331791) | <i>vwbp</i>   | secreted von Willebrand factor-binding protein precursor  |                  |
| AFR72876.1                                                                                                                                           | VFG043451(gi:57650133)     | <i>emp</i>    | secretory extracellular matrix and plasma binding protein |                  |
| AFR72040.1                                                                                                                                           | VFG002420(gb/NP_644838)    | <i>adsA</i>   | Adenosine synthase A                                      | Enzyme           |
| AFR73846.1                                                                                                                                           | VFG004744(gi:15927782)     | <i>hysA</i>   | Hyaluronate lyase                                         |                  |
| ACY11709.1                                                                                                                                           | VFG004703(gi:15927387)     | <i>splA</i>   | Serine Protease                                           |                  |
| ADI98301.1; ATV02856.1                                                                                                                               | VFG004694(gi:82751395)     | <i>splB</i>   |                                                           |                  |
| ADI98300.1; SaureusN305_00083; SaureusN305_00084                                                                                                     | VFG004685(gi:82751394)     | <i>splC</i>   |                                                           |                  |
| ACY11706.1                                                                                                                                           | VFG004678(gi:87160514)     | <i>splD</i>   | thermonuclease precursor                                  |                  |
| CAI81359.1; CCC88458.1                                                                                                                               | VFG004674(gi:82751393)     | <i>splE</i>   |                                                           |                  |
| ADI98299.1                                                                                                                                           | VFG004665(gi:82751392)     | <i>splF</i>   |                                                           |                  |
| AFR72878.1                                                                                                                                           | VFG004737(gi:49483047)     | <i>nuc</i>    |                                                           |                  |
| AFH70185.1                                                                                                                                           | VFG002422(gb/YP_001332911) | <i>chb</i>    | chemotaxis-inhibiting protein                             |                  |
| CAI79911.1                                                                                                                                           | VFG002405(gb/NP_645073)    | <i>esxA</i>   | Type VII Secretion System                                 | Secretion System |
| CAI79912.1                                                                                                                                           | VFG018114(gi:82749989)     | <i>esxA</i>   |                                                           |                  |
| CAI79914.1                                                                                                                                           | VFG002407(gb/NP_645076)    | <i>esxB</i>   |                                                           |                  |
| CAI79915.1                                                                                                                                           | VFG002408(gb/NP_645078)    | <i>esxB</i>   |                                                           |                  |
| CAI79916.1                                                                                                                                           | VFG018165(gi:82749992)     | <i>esxC</i>   |                                                           |                  |
| CAI79917.1                                                                                                                                           | VFG018167(gi:156978617)    | <i>esxC</i>   |                                                           |                  |
| CAI79918.1                                                                                                                                           | VFG018189(gi:82749994)     | <i>esxB</i>   |                                                           |                  |
| AFR73182.1                                                                                                                                           | VFG001293(gb/NP_645861)    | <i>hly</i>    | Alpha hemolysin                                           | Toxin            |
| AFH70247.1                                                                                                                                           | VFG001798(gb/YP_186826)    | <i>hlyB</i>   | beta-hemolysin                                            |                  |
| ATV03271.1; ATV04671.1                                                                                                                               | VFG043452(gi:57651346)     | <i>hlyD</i>   | Delta hemolysin                                           |                  |
| ADI96966.1                                                                                                                                           | VFG005006(gi:82750124)     | <i>sec</i>    | Enterotoxin C-bovine                                      |                  |
| ACY11722.1; CAI81385.1                                                                                                                               | VFG005003(gi:15927398)     | <i>seg</i>    | Enterotoxin G                                             |                  |
| ADI96967.1                                                                                                                                           | VFG004988(gi:82750125)     | <i>sell</i>   | Enterotoxin-like L                                        |                  |
| ACY11727.1                                                                                                                                           | VFG004985(gi:15927403)     | <i>selm</i>   | Enterotoxin-like M                                        |                  |
| ACY11723.1                                                                                                                                           | VFG004982(gi:15927399)     | <i>seln</i>   | Enterotoxin-like N                                        |                  |
| ACY11728.1                                                                                                                                           | VFG004978(gi:15927404)     | <i>selo</i>   | Enterotoxin-like O                                        |                  |
| ADI97633.1                                                                                                                                           | VFG005013(gi:15924938)     | <i>selp</i>   | Enterotoxin-like P                                        |                  |
| CAI81387.1                                                                                                                                           | VFG004970(gi:82751420)     | <i>selU</i>   | Enterotoxin-like U                                        |                  |
| ACY11724.1                                                                                                                                           | VFG004966(gi:15927400)     | <i>yent2</i>  | Enterotoxin Yent2                                         |                  |
| ACY11725.1                                                                                                                                           | VFG004968(gi:15927401)     | <i>yent1</i>  | Enterotoxin Yent1                                         |                  |
| AFR73191.1                                                                                                                                           | VFG004877(gi:82750780)     | <i>eta</i>    | Exfoliative toxin type A                                  |                  |
| ACY10313.1                                                                                                                                           | VFG004942(gi:15926105)     | <i>set12</i>  | exotoxin                                                  |                  |
| AFR72485.1                                                                                                                                           | VFG004959(gi:15926099)     | <i>set6</i>   |                                                           |                  |
| AFR72486.1                                                                                                                                           | VFG004956(gi:15926100)     | <i>set7</i>   |                                                           |                  |
| AFR72487.1; AFR72488.1                                                                                                                               | VFG004964(gi:49482653)     | <i>set2</i>   |                                                           |                  |
| AFR72490.1                                                                                                                                           | VFG004963(gi:49482655)     | <i>set10</i>  |                                                           |                  |
| AFR72492.1                                                                                                                                           | VFG004965(gi:49482656)     | <i>set11</i>  |                                                           |                  |
| AFR72493.1                                                                                                                                           | VFG004961(gi:49482657)     | <i>set13</i>  |                                                           |                  |
| AFR72494.1                                                                                                                                           | VFG004962(gi:49482658)     | <i>set14</i>  |                                                           |                  |
| AFR72497.1                                                                                                                                           | VFG004901(gi:82750145)     | <i>set15</i>  |                                                           |                  |
| ADI98315.1                                                                                                                                           | VFG004862(gi:82751408)     | <i>lukD</i>   |                                                           |                  |
| ADI98372.1                                                                                                                                           | VFG004852(gi:82750532)     | <i>lukE</i>   | Leukotoxin E                                              |                  |
| ADI98503.1; SaureusN305_02303                                                                                                                        | VFG044014(gi:87162038)     | <i>lukH</i>   | leukocidin family protein                                 |                  |
