# Supplementary material for: Genomic islands and the evolution of livestock-associatedStaphylococcus aureusgenomes
Source: Oxford University Press journal article supplement (doi:10.1042/bsr20202287), 2020-11-01
Supplement: bsr-2020-2287_supp1.pdf [file bsr-2020-2287_supp1.pdf]

| Protein ID | 08BA2176 | 08S974 | 71193 | E154 | ED98 | ED133 | ISU935 | LGA251 | Newbould_305 | NZ15 | O11 | O46 | RF122 | ST398 | COG Accessio | COG Class | Function                                                |
|------------|----------|--------|-------|------|------|-------|--------|--------|--------------|------|-----|-----|-------|-------|--------------|-----------|---------------------------------------------------------|
| APE88908.1 | -        | -      | -     | +    | -    | -     | -      | -      | -            | -    | -   | -   | -     | -     | NA           | NA        | hypothetical protein AS852_09550                        |
| APE88909.1 | -        | -      | -     | +    | -    | -     | -      | -      | -            | -    | -   | -   | -     | -     | NA           | NA        | hypothetical protein AS852_09555                        |
| APE88911.1 | -        | -      | -     | +    | -    | +     | -      | -      | +            | -    | -   | -   | -     | +     | NA           | NA        | hypothetical protein AS852_09565                        |
| APE88913.1 | -        | -      | -     | +    | -    | -     | -      | -      | -            | -    | -   | -   | +     | +     | NA           | NA        | hypothetical protein AS852_09575                        |
| APE88917.1 | -        | -      | -     | +    | -    | +     | +      | -      | -            | +    | +   | -   | +     | +     | NA           | NA        | hypothetical protein AS852_09595                        |
| APE88918.1 | -        | -      | -     | +    | -    | +     | -      | +      | -            | -    | -   | -   | +     | -     | NA           | NA        | hypothetical protein AS852_09600                        |
| APE88919.1 | -        | -      | -     | +    | -    | +     | -      | -      | -            | -    | -   | -   | +     | -     | COG0305      | L         | damage-inducible protein                                |
| APE88920.1 | -        | -      | -     | +    | -    | +     | -      | +      | -            | -    | -   | +   | +     | -     | NA           | NA        | hypothetical protein AS852_09610                        |
| APE88921.1 | -        | -      | -     | +    | -    | +     | -      | +      | -            | -    | -   | -   | +     | -     | NA           | NA        | DnaD domain protein                                     |
| APE88922.1 | -        | -      | -     | +    | -    | +     | +      | +      | +            | +    | +   | +   | +     | +     | NA           | NA        | hypothetical protein AS852_09620                        |
| APE88963.1 | -        | -      | -     | +    | -    | -     | -      | -      | -            | -    | -   | +   | -     | -     | NA           | NA        | hypothetical protein AS852_09870                        |
| APE88964.1 | -        | -      | -     | +    | -    | -     | -      | -      | -            | -    | -   | +   | -     | -     | NA           | NA        | glucosamine-6-phosphate isomerase                       |
| AFR72383.1 | +        | -      | +     | -    | +    | +     | -      | -      | -            | -    | -   | +   | -     | +     | NA           | NA        | Phage Holin                                             |
| APE89083.1 | -        | -      | -     | +    | -    | -     | +      | -      | -            | +    | +   | +   | -     | +     | COG0028      | EH        | acetolactate synthase, large subunit, biosynthetic type |
| APE89084.1 | -        | -      | -     | +    | -    | -     | -      | -      | -            | +    | -   | -   | -     | +     | COG0440      | E         | acetolactate synthase I regulatory subunit              |
| AFR72384.1 | +        | -      | +     | -    | +    | +     | -      | -      | -            | -    | -   | +   | -     | +     | NA           | NA        | amidase                                                 |
| APE89093.1 | -        | -      | -     | +    | -    | -     | -      | -      | -            | +    | +   | +   | -     | -     | COG1191      | K         | RNA polymerase sigma factor SigB                        |
| APE89094.1 | -        | -      | -     | +    | -    | -     | -      | -      | -            | +    | +   | +   | -     | -     | COG2172      | T         | anti-sigma B factor RsbW                                |
| APE89095.1 | -        | -      | -     | +    | -    | -     | -      | -      | -            | +    | +   | +   | -     | -     | COG1366      | T         | anti-anti-sigma factor                                  |
| APE89096.1 | -        | -      | -     | +    | -    | -     | -      | -      | -            | +    | +   | +   | -     | -     | COG2208      | TK        | serine/threonine protein phosphatase                    |
| APE89097.1 | -        | -      | -     | +    | -    | -     | -      | -      | -            | -    | -   | -   | -     | -     | NA           | NA        | hypothetical protein AS852_10755                        |
| APE89098.1 | -        | -      | -     | +    | -    | -     | -      | -      | -            | -    | -   | -   | -     | -     | COG2337      | V         | PemK family transcriptional regulator                   |
| APE89099.1 | -        | -      | -     | +    | -    | -     | -      | -      | -            | +    | +   | -   | -     | -     | NA           | NA        | antitoxin MazE                                          |
| APE89100.1 | -        | -      | -     | +    | -    | -     | -      | -      | -            | +    | +   | +   | -     | -     | COG0787      | M         | alanine racemase                                        |
| APE89101.1 | -        | -      | -     | +    | -    | -     | -      | -      | -            | -    | +   | +   | +     | -     | COG0736      | I         | holo-ACP synthase                                       |
| AFR72460.1 | +        | -      | +     | -    | +    | +     | -      | +      | -            | -    | -   | -   | +     | +     | COG0518      | F         | putative GMP synthase                                   |
| APE89102.1 | -        | -      | -     | +    | -    | -     | -      | -      | -            | +    | +   | +   | -     | -     | COG3402      | S         | hypothetical protein AS852_10780                        |
| APE89103.1 | -        | -      | -     | +    | -    | -     | -      | -      | -            | +    | +   | +   | -     | -     | COG3428      | S         | hypothetical protein AS852_10785                        |
| APE89104.1 | -        | -      | -     | +    | -    | -     | -      | -      | -            | -    | -   | -   | -     | -     | NA           | NA        | hypothetical protein AS852_10790                        |
| AFR72461.1 | +        | -      | +     | -    | -    | +     | -      | +      | +            | -    | -   | -   | +     | +     | COG0582      | LX        | Integrase                                               |
| AFR72462.1 | -        | -      | -     | -    | -    | +     | -      | -      | -            | -    | -   | -   | +     | +     | NA           | NA        | Transcriptional regulator                               |
| AFR72463.1 | +        | -      | -     | -    | -    | +     | -      | -      | -            | -    | -   | -   | +     | +     | NA           | NA        | phage protein                                           |
| AFR72464.1 | +        | -      | -     | -    | -    | +     | -      | -      | +            | -    | -   | -   | +     | +     | NA           | NA        | pathogenicity island protein                            |
| AFR72465.1 | +        | -      | -     | -    | +    | +     | -      | +      | +            | -    | -   | -   | +     | +     | NA           | NA        | hypothetical protein C248_0452                          |
| AFR72037.1 | +        | -      | +     | -    | -    | +     | -      | +      | -            | -    | +   | -   | +     | +     | NA           | NA        | putative exported protein                               |
| APE89536.1 | -        | -      | -     | +    | -    | -     | -      | -      | -            | +    | -   | -   | -     | -     | NA           | NA        | restriction endonuclease                                |
| AFR72466.1 | +        | -      | -     | -    | +    | +     | -      | +      | +            | -    | -   | -   | +     | +     | NA           | NA        | hypothetical protein C248_0453                          |
| AFR72467.1 | +        | -      | -     | -    | +    | +     | -      | +      | +            | -    | -   | -   | +     | +     | NA           | NA        | Hypothetical protein C248_0454                          |
| AD196568.1 | -        | -      | -     | -    | -    | +     | -      | -      | -            | -    | -   | -   | -     | -     | NA           | NA        | conserved hypothetical protein                          |
| AD196569.1 | -        | -      | -     | -    | -    | +     | -      | -      | -            | -    | -   | -   | -     | -     | NA           | NA        | putative helicase                                       |
| AFR72468.1 | +        | -      | -     | -    | -    | +     | -      | +      | +            | -    | -   | -   | -     | +     | NA           | NA        | putative primase                                        |
| AD196570.1 | -        | -      | -     | -    | -    | +     | -      | -      | -            | -    | -   | -   | -     | -     | NA           | NA        | hypothetical protein SAOV_0028                          |
| AD196571.1 | -        | -      | -     | -    | -    | +     | -      | -      | -            | -    | -   | -   | -     | -     | NA           | NA        | hypothetical protein SAOV_0029                          |
| AD196572.1 | -        | -      | -     | -    | -    | +     | -      | -      | -            | -    | -   | -   | -     | -     | COG2963      | X         | putative insertion element protein                      |
| AD196573.1 | -        | -      | -     | -    | -    | +     | -      | -      | -            | -    | -   | -   | -     | -     | COG2801      | X         | putative insertion element protein                      |
| AD196575.1 | -        | -      | -     | -    | -    | +     | -      | -      | -            | -    | -   | -   | -     | -     | NA           | NA        | putative transposase, truncation                        |
| AD196576.1 | -        | -      | -     | -    | -    | +     | -      | -      | -            | -    | -   | -   | +     | +     | COG0042      | J         | hypothetical protein SAOV_0034                          |
| AD196577.1 | -        | -      | -     | -    | -    | +     | -      | -      | -            | -    | -   | -   | -     | -     | NA           | NA        | hypothetical protein SAOV_0035                          |
| AD196578.1 | -        | -      | -     | -    | +    | +     | -      | +      | +            | -    | -   | -   | +     | +     | COG0730      | S         | hypothetical protein SAOV_0036                          |
| AD196579.1 | -        | -      | -     | -    | +    | +     | -      | +      | +            | -    | -   | -   | +     | +     | COG1937      | K         | conserved hypothetical protein                          |
| AFR72469.1 | +        | -      | -     | -    | +    | +     | -      | +      | +            | -    | -   | -   | +     | +     | NA           | NA        | hypothetical protein C248_0456                          |

|            |   |   |   |   |   |   |   |   |   |   |   |   |   |   |         |    |                                                       |
|------------|---|---|---|---|---|---|---|---|---|---|---|---|---|---|---------|----|-------------------------------------------------------|
| ADI96580.1 | - | - | - | - | + | + | - | + | + | - | - | - | + | + | COG0425 | O  | conserved hypothetical protein                        |
| ADI96581.1 | - | - | - | - | + | + | - | + | + | - | - | - | + | - | COG0607 | P  | metallo-beta-lactamase family protein                 |
| ADI96582.1 | - | - | - | - | + | + | - | + | + | - | - | - | + | - | COG0446 | I  | conserved hypothetical protein                        |
| ADI96583.1 | - | - | - | - | + | + | - | + | + | - | + | + | - | - | COG0042 | J  | hypothetical protein SAOV_0041                        |
| ADI96584.1 | - | - | - | - | + | + | - | - | - | - | + | + | - | - | NA      | NA | hypothetical protein SAOV_0042                        |
| ADI96585.1 | - | - | - | - | + | + | - | + | + | - | - | + | - | - | COG3070 | K  | conserved hypothetical protein                        |
| ADI96586.1 | - | - | - | - | + | + | - | - | + | - | + | + | - | - | NA      | NA | hypothetical protein SAOV_0044                        |
| ADI96587.1 | - | - | - | - | + | + | - | + | + | - | - | - | - | - | COG1112 | L  | hypothetical protein SAOV_0045                        |
| ADI96588.1 | - | - | - | - | + | + | - | + | + | - | + | + | - | - | NA      | NA | hypothetical protein SAOV_0046                        |
| AFR72470.1 | + | - | - | - | - | + | - | - | + | - | - | - | - | + | NA      | NA | hypothetical protein C248_0457                        |
| ADI96591.1 | - | - | - | - | + | + | - | + | + | - | - | - | - | - | NA      | NA | l-phosphatidylinositol phosphodiesterase              |
| ADI96592.1 | - | - | - | - | + | - | - | + | - | - | - | - | - | - | COG2207 | K  | putative transcriptional regulator                    |
| ADI96593.1 | - | - | - | - | + | - | - | + | - | - | - | - | - | - | COG1473 | R  | putative peptidase                                    |
| ADI96811.1 | - | - | - | - | + | + | - | + | - | - | - | + | - | - | NA      | NA | putative prophage integrase                           |
| ADI96812.1 | - | - | - | - | - | + | - | - | - | - | - | + | - | - | COG1266 | O  | CAAX amino terminal protease family                   |
| ADI96813.1 | - | - | - | - | - | + | - | - | - | - | - | - | - | - | NA      | NA | hypothetical protein SAOV_0276                        |
| ADI96814.1 | - | - | - | - | - | + | - | - | - | - | - | + | - | - | NA      | NA | putative lipoprotein                                  |
| ADI96815.1 | - | - | - | - | - | + | - | - | - | - | + | + | - | + | NA      | NA | hypothetical phage-related protein                    |
| ADI96816.1 | - | - | - | - | - | + | - | - | - | - | + | - | - | - | COG1396 | K  | phage repressor                                       |
| AFR72471.1 | + | - | - | - | - | + | - | - | + | - | - | - | - | + | NA      | NA | hypothetical protein C248_0458                        |
| ADI96817.1 | - | - | - | - | - | + | - | - | - | - | - | + | + | - | NA      | NA | hypothetical phage-related protein                    |
| ADI96818.1 | - | - | - | - | - | + | - | - | - | - | - | - | - | - | NA      | NA | hypothetical protein SAOV_0281                        |
| ADI96819.1 | - | - | - | - | - | + | - | - | - | - | + | + | - | - | NA      | NA | hypothetical protein SAOV_0282                        |
| ADI96824.1 | - | - | - | - | - | + | - | - | - | - | - | - | - | - | NA      | NA | hypothetical protein SAOV_0287                        |
| ADI96825.1 | - | - | - | - | - | + | - | - | - | - | + | - | - | + | NA      | NA | hypothetical protein SAOV_0288                        |
| ADI96826.1 | - | - | - | - | - | + | - | - | - | - | - | - | - | + | NA      | NA | putative topoisomerase                                |
| AFR72472.1 | + | - | - | - | - | + | - | - | + | - | - | - | - | + | NA      | NA | hypothetical protein C248_0459                        |
| ADI96827.1 | - | - | - | - | - | + | - | - | - | - | - | - | - | - | COG0629 | L  | Single-stranded DNA-binding protein, phage associated |
| ADI96829.1 | - | - | - | - | - | + | - | - | - | - | - | - | - | - | NA      | NA | Phage replication initiation                          |
| ADI96832.1 | - | - | - | - | - | + | - | - | - | - | - | - | - | - | NA      | NA | hypothetical phage-related protein                    |
| ADI96836.1 | - | - | - | - | - | + | - | - | - | - | + | - | - | - | NA      | NA | Transcriptional regulator, Cro/C1 family              |
| AFR72473.1 | - | - | - | - | - | - | - | - | - | - | - | - | - | - | NA      | NA | adenosine deaminase                                   |
| ADI96841.1 | - | - | - | - | - | + | - | - | - | - | - | + | + | - | NA      | NA | hypothetical protein SAOV_0304                        |
| ADI96844.1 | - | - | - | - | - | + | - | - | - | - | - | + | - | - | NA      | NA | hypothetical protein SAOV_0307                        |
| ADI96845.1 | - | - | - | - | - | + | - | - | - | - | - | - | - | - | NA      | NA | hypothetical protein SAOV_0308                        |
| AFR72474.1 | + | - | - | + | - | + | - | - | + | - | - | - | - | - | NA      | NA | Hypothetical protein C248_0461                        |
| AFR72038.1 | + | - | - | - | - | + | - | - | + | - | - | + | + | + | NA      | NA | putative exported protein                             |
| AFR72476.1 | + | - | - | - | - | - | - | - | - | - | - | - | - | - | NA      | NA | hypothetical protein C248_0463                        |
| ADI96867.1 | - | - | - | - | - | + | - | - | - | - | - | - | - | - | NA      | NA | Phage tail length tape-measure protein                |
| ADI96868.1 | - | - | - | - | - | + | - | - | - | - | - | - | - | - | NA      | NA | Phage tail length tape-measure protein                |
| AFR72477.1 | + | - | - | - | - | - | - | - | - | - | - | - | - | - | NA      | NA | hypothetical protein C248_0464                        |
| ADI96877.1 | - | - | - | - | - | + | - | - | - | - | - | - | - | - | NA      | NA | hypothetical protein SAOV_0340                        |
| ADI96880.1 | - | - | - | - | - | + | - | - | - | - | - | - | - | - | NA      | NA | hypothetical protein SAOV_0343                        |
| ADI96881.1 | - | - | - | - | - | + | - | - | + | - | - | + | + | - | NA      | NA | hypothetical protein SAOV_0344                        |
| ADI96882.1 | - | - | - | - | - | + | - | - | - | - | - | - | - | - | NA      | NA | hypothetical protein SAOV_0345                        |
| ADI96883.1 | - | - | - | - | - | + | - | - | - | - | - | - | - | - | COG0657 | I  | hypothetical protein SAOV_0346c                       |
| ADI96884.1 | - | - | - | - | - | + | - | - | - | - | - | - | - | - | COG1902 | C  | NADH-dependent flavin oxidoreductase                  |
| AFR72478.1 | - | - | - | - | - | + | + | - | - | - | - | + | - | - | NA      | NA | hypothetical protein C248_0465                        |
| ADI96955.1 | - | - | - | - | - | + | - | - | - | - | - | - | - | - | NA      | NA | pathogenicity island protein                          |
| AFR72479.1 | + | - | - | + | - | - | - | + | - | - | - | - | - | - | NA      | NA | hypothetical protein C248_0466                        |
| ADI96961.1 | - | - | - | - | - | + | - | - | - | - | - | - | - | - | NA      | NA | pathogenicity island protein                          |

|            |   |   |   |   |   |   |   |   |   |   |   |   |   |   |         |    |                                                  |
|------------|---|---|---|---|---|---|---|---|---|---|---|---|---|---|---------|----|--------------------------------------------------|
| AD196962.1 | - | - | - | - | - | + | - | - | - | - | - | - | - | - | NA      | NA | pathogenicity island protein, putative terminase |
| AD196964.1 | - | - | - | - | - | + | - | - | - | - | - | - | + | - | NA      | NA | pathogenicity island protein                     |
| AD196965.1 | - | - | - | - | - | + | - | + | - | - | - | - | + | - | NA      | NA | pathogenicity island protein                     |
| AD196966.1 | - | - | - | - | - | + | - | - | - | - | - | - | + | - | NA      | NA | staphylococcal enterotoxin C-ovine               |
| AD196967.1 | - | - | - | - | - | + | + | + | - | - | - | - | + | - | NA      | NA | staphylococcal enterotoxin L                     |
| AD197584.1 | - | - | - | - | - | + | - | - | - | - | - | - | - | - | NA      | NA | hypothetical protein SAOV_1071c                  |
| AD197585.1 | - | - | - | - | - | + | - | - | - | - | - | - | - | - | NA      | NA | hypothetical protein SAOV_1072c                  |
| AD197586.1 | - | - | - | - | - | + | - | - | - | - | - | - | - | - | NA      | NA | hypothetical protein SAOV_1073c                  |
| AD197588.1 | - | - | - | - | - | + | - | - | - | - | - | - | - | - | NA      | NA | hypothetical protein SAOV_1075                   |
| AD197589.1 | - | - | - | - | - | + | - | - | - | - | - | - | - | - | NA      | NA | hypothetical phage-related protein               |
| AD197590.1 | - | - | - | - | - | + | - | + | - | - | - | - | - | - | COG3617 | X  | prophage, antirepressor, putative                |
| AD197598.1 | - | - | - | - | - | + | - | + | - | + | + | + | + | - | NA      | NA | hypothetical phage-related protein               |
| AD197599.1 | - | - | - | - | - | + | - | - | - | - | - | - | - | - | NA      | NA | hypothetical phage-related protein               |
| AD197606.1 | - | - | - | - | - | + | - | - | - | - | - | - | - | - | NA      | NA | hypothetical protein SAOV_1093                   |
| AD197607.1 | - | - | - | - | - | + | - | - | - | - | - | - | - | - | NA      | NA | hypothetical protein SAOV_1094                   |
| AFR72484.1 | - | - | - | - | - | - | - | - | - | - | - | - | - | - | NA      | NA | hypothetical protein C248_0471                   |
| AFR72039.1 | + | - | + | - | - | + | - | + | - | - | + | + | + | + | COG1235 | P  | metallo-beta-lactamase superfamily protein       |
| AD197627.1 | - | - | - | - | - | + | - | - | - | - | - | - | - | - | COG5412 | X  | Phage tail length tape-measure protein           |
| AD197628.1 | - | - | - | - | - | + | - | - | - | - | - | - | - | - | NA      | NA | Phage tail length tape-measure protein           |
| AD197632.1 | - | - | - | - | - | + | + | - | - | - | + | - | - | - | NA      | NA | hypothetical phage protein                       |
| AD197633.1 | - | - | - | - | - | + | + | - | - | - | - | - | + | - | NA      | NA | Enterotoxin, phage associated                    |
| AD197635.1 | - | - | - | - | - | + | + | - | - | - | - | - | - | - | NA      | NA | Phage amidase                                    |
| AD197665.1 | - | - | - | - | - | + | + | - | - | - | - | - | - | - | NA      | NA | hypothetical protein SAOV_1152                   |
| AD197666.1 | - | - | - | - | - | + | + | - | - | - | - | - | - | - | NA      | NA | hypothetical protein SAOV_1153c                  |
| AD197670.1 | - | - | - | - | - | + | - | - | - | - | - | - | - | - | NA      | NA | hypothetical protein SAOV_1157c                  |
| AD197675.1 | - | - | - | - | - | + | + | - | - | + | - | - | + | - | NA      | NA | hypothetical protein SAOV_1162                   |
| AD197683.1 | - | - | - | - | - | + | - | - | - | - | - | - | + | - | NA      | NA | probable membrane protein                        |
| AFR72489.1 | + | - | + | - | - | - | - | - | - | - | - | - | - | - | NA      | NA | Hypothetical protein C248_0476                   |
| AD197947.1 | - | - | - | - | - | + | - | - | - | - | - | - | - | - | NA      | NA | conserved hypothetical protein                   |
| AFR72491.1 | + | - | - | - | - | - | - | - | - | - | - | - | - | - | NA      | NA | hypothetical protein C248_0478                   |
| AD198288.1 | - | - | - | - | - | + | - | - | - | - | + | - | - | - | COG1131 | V  | ABC transporter, ATP-binding protein             |
| AD198289.1 | - | - | - | - | - | + | - | - | - | - | + | - | - | - | NA      | NA | putative ABC transporter permease protein        |
| AD198290.1 | - | - | - | - | - | + | + | - | - | - | + | - | - | - | NA      | NA | conserved hypothetical protein                   |
| AD198291.1 | - | - | - | - | - | + | - | - | - | - | - | - | - | - | NA      | NA | hypothetical protein SAOV_1787                   |
| AD198295.1 | - | - | - | - | - | + | - | + | - | - | - | - | - | - | NA      | NA | hypothetical protein SAOV_1791                   |
| AD198296.1 | - | - | - | - | - | + | - | - | - | - | - | - | - | - | NA      | NA | hypothetical protein SAOV_1792                   |
| AD198299.1 | - | - | - | - | - | + | + | - | - | + | + | + | + | - | COG3591 | E  | serine proteinase                                |
| AD198300.1 | - | - | - | - | - | + | + | - | - | + | - | - | + | - | COG3591 | E  | serine proteinase                                |
| AD198301.1 | - | - | - | - | - | + | + | - | + | - | + | - | + | - | COG3591 | E  | serine proteinase                                |
| AD198302.1 | - | - | - | - | - | + | + | - | - | + | - | - | + | - | NA      | NA | beta-lactamase                                   |
| AD198303.1 | - | - | - | - | - | + | - | + | - | - | - | + | - | - | NA      | NA | putative lantibiotic ABC transporter protein     |
| AD198304.1 | - | - | - | - | - | + | - | + | - | - | - | + | - | - | NA      | NA | putative lantibiotic ABC transporter protein     |
| AD198305.1 | - | - | - | - | - | + | - | - | - | - | - | - | + | - | COG1131 | V  | epidermin immunity protein F                     |
| AD198306.1 | - | - | - | - | - | + | - | + | - | - | - | - | + | - | COG1404 | O  | probable serine protease precursor               |
| AD198307.1 | - | - | - | - | - | + | - | + | - | - | - | - | + | - | COG0452 | H  | Epidermin biosynthesis protein epiD              |
| AD198308.1 | - | - | - | - | - | + | - | + | - | - | - | - | + | - | NA      | NA | Epidermin biosynthesis protein epiC              |
| AD198309.1 | - | - | - | - | - | + | - | + | - | - | - | - | + | - | NA      | NA | epidermin biosynthesis protein EpiB              |
| AD198310.1 | - | - | - | - | - | + | - | - | - | - | - | - | + | - | NA      | NA | hypothetical protein SAOV_1807                   |
| AD198311.1 | - | - | - | - | - | + | - | - | - | - | - | - | + | - | NA      | NA | hypothetical protein SAOV_1808                   |
| AD198314.1 | - | - | - | - | - | + | - | + | - | - | - | - | + | - | NA      | NA | hypothetical protein SAOV_1811                   |
| AD198315.1 | - | - | - | - | - | + | + | - | + | - | + | + | + | - | NA      | NA | leukotoxin D subunit                             |

|            |   |   |   |   |   |   |   |   |   |   |   |   |   |   |         |     |                                                   |
|------------|---|---|---|---|---|---|---|---|---|---|---|---|---|---|---------|-----|---------------------------------------------------|
| ADI98316.1 | - | - | - | - | + | + | + | - | + | - | - | - | + | - | NA      | NA  | hypothetical protein SAOV_1814                    |
| ADI98317.1 | - | - | - | - | + | + | + | - | + | - | - | - | + | - | NA      | NA  | hypothetical protein SAOV_1815                    |
| ADI98318.1 | - | - | - | - | + | + | - | - | + | - | - | - | - | - | NA      | NA  | hypothetical protein SAOV_1816                    |
| AFR72040.1 | + | - | + | - | - | + | - | + | - | - | + | - | + | + | COG0737 | FV  | putative 5'-nucleotidase                          |
| ADI98372.1 | - | - | - | - | + | + | + | - | + | - | + | - | + | - | NA      | NA  | leukocidin chain lukM precursor                   |
| ADI98373.1 | - | - | - | - | - | + | - | - | - | - | + | - | - | - | NA      | NA  | lytic enzyme                                      |
| ADI98374.1 | - | - | - | - | - | + | - | - | - | - | + | + | - | - | COG5546 | S   | phage-associated holin                            |
| ADI98381.1 | - | - | - | - | + | + | - | - | - | - | + | - | - | - | NA      | NA  | hypothetical protein SAOV_1919c                   |
| ADI98382.1 | - | - | - | - | + | + | - | - | - | - | + | - | - | - | NA      | NA  | hypothetical protein SAOV_1920c                   |
| ADI98383.1 | - | - | - | - | + | + | - | - | - | - | + | - | - | - | NA      | NA  | hypothetical protein SAOV_1921c                   |
| ADI98384.1 | - | - | - | - | + | + | - | - | - | - | + | - | - | - | NA      | NA  | hypothetical protein SAOV_1922c                   |
| ADI98385.1 | - | - | - | - | + | + | - | - | - | - | + | - | - | - | NA      | NA  | hypothetical phage related protein                |
| ADI98386.1 | - | - | - | - | - | + | - | - | - | - | - | - | - | - | NA      | NA  | hypothetical protein SAOV_1924c                   |
| ADI98387.1 | - | - | - | - | + | + | - | - | - | - | + | + | - | - | NA      | NA  | DNA packaging protein                             |
| ADI98388.1 | - | - | - | - | + | + | - | - | - | - | + | + | - | - | NA      | NA  | hypothetical protein SAOV_1926c                   |
| ADI98389.1 | - | - | - | - | + | + | - | - | - | - | + | + | - | - | NA      | NA  | Phage capsid protein                              |
| ADI98390.1 | - | - | - | - | + | + | - | - | - | - | + | + | - | - | NA      | NA  | Prohead protease                                  |
| ADI98391.1 | - | - | - | - | + | + | - | - | - | - | + | + | - | - | NA      | NA  | Phage portal protein                              |
| ADI98392.1 | - | - | - | - | + | + | - | - | - | - | + | + | - | - | NA      | NA  | phi PVL orf 3-like protein-related protein        |
| ADI98393.1 | - | - | - | - | + | + | - | - | - | - | + | + | - | - | COG4626 | X   | Terminase large subunit, phage associated         |
| ADI98394.1 | - | - | - | - | + | + | - | - | - | - | + | + | - | - | NA      | NA  | Phage Terminase Small Subunit                     |
| ADI98395.1 | - | - | - | - | + | + | - | - | - | - | + | + | - | - | COG1403 | V   | hypothetical protein SAOV_1933c                   |
| ADI98396.1 | - | - | - | - | + | + | - | - | - | - | + | + | - | - | NA      | NA  | hypothetical phage-related protein                |
| AFR72498.1 | - | - | - | - | - | - | - | - | - | - | - | - | - | - | NA      | NA  | putative exported protein                         |
| AFR72499.1 | + | - | - | - | - | - | - | - | - | - | - | - | - | - | NA      | NA  | hypothetical protein C248_0486                    |
| ADI98412.1 | - | - | - | - | - | + | - | - | - | - | - | - | - | - | NA      | NA  | DNA helicase, phage-associated                    |
| ADI98416.1 | - | - | - | - | - | + | - | - | - | - | + | - | - | - | NA      | NA  | hypothetical protein SAOV_1954c                   |
| ADI98419.1 | - | - | - | - | + | + | + | + | + | - | + | + | - | - | NA      | NA  | hypothetical protein SAOV_1957c                   |
| ADI98420.1 | - | - | - | - | + | + | + | + | + | - | + | + | - | - | NA      | NA  | hypothetical protein SAOV_1958c                   |
| ADI98421.1 | - | - | - | - | + | + | - | - | + | - | - | - | - | - | NA      | NA  | hypothetical protein SAOV_1959c                   |
| ADI98423.1 | - | - | - | - | - | + | - | - | - | - | - | - | - | - | NA      | NA  | hypothetical protein SAOV_1961c                   |
| ADI98424.1 | - | - | - | - | - | + | - | - | - | - | - | - | - | - | NA      | NA  | hypothetical protein SAOV_1962c                   |
| ADI98425.1 | - | - | - | - | - | + | - | - | - | - | + | - | - | - | NA      | NA  | hypothetical protein SAOV_1963                    |
| ADI98426.1 | - | - | - | - | - | + | - | - | - | - | - | - | - | - | NA      | NA  | hypothetical phage-related protein                |
| ADI98428.1 | - | - | - | - | - | + | - | - | - | - | - | - | - | - | NA      | NA  | hypothetical protein SAOV_1966                    |
| ADI98429.1 | - | - | - | - | + | + | - | - | - | - | + | - | - | + | NA      | NA  | hypothetical protein SAOV_1967c                   |
| ADI98430.1 | - | - | - | - | - | + | - | - | - | - | - | - | - | - | NA      | NA  | hypothetical protein SAOV_1968c                   |
| ADI98431.1 | - | - | - | - | + | + | - | - | + | - | - | - | - | - | NA      | NA  | hypothetical protein SAOV_1969c                   |
| ADI98433.1 | - | - | - | - | - | + | - | - | - | - | + | - | - | - | NA      | NA  | hypothetical protein SAOV_1971                    |
| ADI98435.1 | - | - | - | - | - | + | - | - | - | - | + | + | - | - | NA      | NA  | hypothetical protein SAOV_1973                    |
| ADI98436.1 | - | - | - | - | + | + | + | + | - | - | + | + | - | - | NA      | NA  | prophage integrase                                |
| ADI98503.1 | - | - | - | - | - | + | - | - | + | - | + | - | - | - | NA      | NA  | probable leukocidin S subunit                     |
| ADI98504.1 | - | - | - | - | - | + | - | - | + | - | + | - | + | - | COG0624 | E   | probable succinyldiaminopimelate desuccinylase    |
| ADI98505.1 | - | - | - | - | - | + | - | - | - | - | - | - | - | - | COG0697 | GER | Permease of the drug/metabolite transporter (DMT) |
| ADI98506.1 | - | - | - | - | - | + | - | - | - | - | - | - | + | - | COG0156 | H   | 5-aminolevulinate synthase                        |
| ADI98507.1 | - | - | - | - | - | + | - | - | + | - | + | - | + | - | COG0168 | P   | probable sodium transport protein                 |
| ADI98508.1 | - | - | - | - | - | + | - | - | - | - | - | - | + | - | NA      | NA  | transposase                                       |
| ADI98509.1 | - | - | - | - | - | + | - | - | - | - | + | + | - | - | NA      | NA  | phage-like protein                                |
| ADI98510.1 | - | - | - | - | - | + | - | - | + | - | + | - | + | + | NA      | NA  | hypothetical protein SAOV_2049                    |
| ADI98511.1 | - | - | - | - | - | + | - | - | - | - | - | - | - | - | NA      | NA  | hypothetical protein SAOV_2050                    |
| ADI98517.1 | - | - | - | - | - | + | - | - | - | - | - | - | - | - | NA      | NA  | hypothetical protein SAOV_2056c                   |

|            |   |   |   |   |   |   |   |   |   |   |   |   |   |   |   |   |         |    |                                                    |
|------------|---|---|---|---|---|---|---|---|---|---|---|---|---|---|---|---|---------|----|----------------------------------------------------|
| ADI98522.1 | - | - | - | - | - | + | - | - | - | - | - | - | - | - | + | - | NA      | NA | hypothetical protein SAOV_2061c                    |
| ADI98523.1 | - | - | - | - | - | + | - | - | - | - | - | - | - | - | - | - | NA      | NA | putative prophage antirepressor                    |
| ADI98524.1 | - | - | - | - | + | + | - | - | - | - | - | - | - | - | - | - | NA      | NA | putative transcriptional regulator                 |
| ADI98525.1 | - | - | - | - | - | + | - | - | - | - | - | - | - | - | - | - | COG1396 | K  | putative transcriptional regulator                 |
| ADI98526.1 | - | - | - | - | - | + | - | - | - | - | - | - | - | - | + | - | COG0582 | LX | probable integrase                                 |
| ADI98527.1 | - | - | - | - | - | + | - | - | - | - | - | - | - | - | + | + | COG0459 | O  | 60 kDa chaperonin protein                          |
| AFR72041.1 | + | - | + | - | - | - | - | - | - | - | - | - | - | - | + | + | COG1576 | J  | hypothetical protein C248_0027                     |
| ADI98883.1 | - | - | - | - | - | + | - | - | - | - | - | - | - | - | + | - | NA      | NA | hypothetical protein SAOV_2443c                    |
| ADI98893.1 | - | - | - | - | - | + | + | + | + | + | - | - | - | - | + | - | COG4115 | V  | conserved hypothetical protein                     |
| ADI98894.1 | - | - | - | - | - | + | + | + | + | + | - | - | - | - | + | - | COG2161 | V  | hypothetical protein SAOV_2454c                    |
| ADI98980.1 | - | - | - | - | - | + | + | + | + | + | - | - | - | - | - | - | NA      | NA | permease, putative                                 |
| ADI98990.1 | - | - | - | - | - | + | - | - | - | - | - | - | - | - | - | - | NA      | NA | hypothetical protein SAOV_2551c                    |
| ADI98991.1 | - | - | - | - | - | + | - | - | - | - | - | - | - | - | - | - | NA      | NA | hypothetical protein SAOV_2552c                    |
| ACY09979.1 | - | - | - | - | - | + | - | - | - | - | - | - | - | - | - | - | NA      | NA | hypothetical protein SAAV_0030                     |
| ACY09980.1 | - | - | - | - | - | + | - | - | - | - | - | - | - | - | - | - | NA      | NA | conserved hypothetical protein                     |
| ACY09993.1 | - | - | - | - | - | + | - | - | - | - | - | - | - | - | - | - | NA      | NA | hypothetical protein SAAV_0044                     |
| ACY10313.1 | - | - | - | - | - | + | - | - | - | - | - | - | - | - | - | - | NA      | NA | superantigen-like protein                          |
| ACY10325.1 | - | - | - | - | - | + | - | - | - | - | - | - | - | - | - | - | NA      | NA | putative lipoprotein                               |
| ACY10326.1 | - | - | - | - | - | + | - | - | - | - | - | - | - | - | - | - | NA      | NA | putative lipoprotein                               |
| ACY10327.1 | - | - | - | - | - | + | - | - | - | - | - | - | - | - | + | - | NA      | NA | putative lipoprotein                               |
| ACY10330.1 | - | - | - | - | - | + | - | - | - | - | - | - | - | - | - | - | NA      | NA | conserved hypothetical protein                     |
| ACY10703.1 | - | - | - | - | - | + | - | - | - | + | - | - | - | - | - | - | COG1464 | P  | ABC transporter, substrate-binding protein         |
| AFR72514.1 | + | - | + | - | - | + | - | - | - | + | - | - | - | - | + | - | COG0523 | R  | putative cobalamin synthesis protein               |
| ACY10705.1 | - | - | - | - | - | + | - | - | - | - | - | - | - | - | - | - | NA      | NA | SAP domain protein                                 |
| ACY10706.1 | - | - | - | - | - | + | - | - | - | + | - | - | - | - | - | - | NA      | NA | conserved hypothetical protein                     |
| ACY10711.1 | - | - | - | - | - | + | - | - | - | + | - | - | - | - | - | - | NA      | NA | pathogenicity island protein                       |
| ACY10713.1 | - | - | - | - | - | + | - | - | - | - | - | - | - | - | + | - | NA      | NA | pathogenicity island protein ORF15                 |
| ACY10714.1 | - | - | - | - | - | + | - | - | - | - | - | - | - | - | + | - | COG5519 | S  | pathogenicity island protein ORF 14/13             |
| AFR72515.1 | + | - | + | - | - | + | - | - | - | + | - | - | - | - | + | - | COG1009 | CP | Putative NADH Ubiquinone plastoquinone protein     |
| AFR72042.1 | + | - | - | - | - | - | - | - | - | - | - | - | - | - | - | - | COG1397 | O  | ADP-ribosylglycohydrolase                          |
| ACY10716.1 | - | - | - | - | - | + | - | - | - | + | + | - | - | - | + | - | NA      | NA | pathogenicity island protein ORF11                 |
| ACY10717.1 | - | - | - | - | - | + | - | - | - | + | + | - | - | - | + | - | NA      | NA | pathogenicity island protein ORF10                 |
| ACY10718.1 | - | - | - | - | - | + | - | - | - | - | + | - | - | - | + | - | NA      | NA | pathogenicity island protein ORF9                  |
| ACY10719.1 | - | - | - | - | - | + | - | - | - | - | + | - | - | - | + | - | NA      | NA | pathogenicity island protein ORF8                  |
| ACY10721.1 | - | - | - | - | - | + | - | - | - | + | + | - | - | - | + | - | NA      | NA | pathogenicity island protein ORF6                  |
| ACY10722.1 | - | - | - | - | - | + | - | - | - | + | + | - | - | - | + | - | COG3728 | X  | pathogenicity island protein ORF5; phage terminase |
| ACY10723.1 | - | - | - | - | - | + | - | - | - | + | + | - | - | - | - | - | NA      | NA | hypothetical protein SAAV_0806                     |
| ACY10724.1 | - | - | - | - | - | + | - | - | - | - | - | - | - | - | - | - | NA      | NA | conserved hypothetical protein                     |
| AFR72516.1 | + | - | + | - | - | + | - | - | - | + | - | - | - | - | + | - | COG3002 | S  | hypothetical protein C248_0503                     |
| ACY10725.1 | - | - | - | - | - | + | - | - | - | - | - | - | - | - | - | - | NA      | NA | conserved hypothetical protein                     |
| ACY10727.1 | - | - | - | - | - | + | - | - | - | - | - | - | - | - | - | - | NA      | NA | hypothetical protein SAAV_0810                     |
| ACY10728.1 | - | - | - | - | - | + | - | - | - | + | + | - | - | - | - | - | COG3237 | S  | hypothetical protein SAAV_0811                     |
| ACY10736.1 | - | - | - | - | - | + | - | - | - | - | - | - | - | - | - | - | NA      | NA | DNA adenine methylase                              |
| ACY10737.1 | - | - | - | - | - | + | - | - | - | - | - | - | - | - | - | - | COG0338 | L  | putative methylase                                 |
| ACY10738.1 | - | - | - | - | - | + | - | - | - | - | - | - | - | - | - | - | NA      | NA | conserved hypothetical phage protein               |
| AFR72517.1 | + | - | + | - | - | + | - | - | - | + | - | - | - | - | + | - | COG5609 | S  | hypothetical protein C248_0504                     |
| ACY10743.1 | - | - | - | - | - | + | - | - | - | - | - | - | - | - | + | - | NA      | NA | conserved hypothetical phage protein               |
| ACY10745.1 | - | - | - | - | - | + | - | - | - | - | - | - | - | - | - | - | NA      | NA | conserved hypothetical phage protein               |
| ACY10746.1 | - | - | - | - | - | + | - | - | - | - | - | - | - | - | - | - | NA      | NA | conserved hypothetical phage protein               |
| ACY10747.1 | - | - | - | - | - | + | - | - | - | + | + | - | - | - | - | - | NA      | NA | conserved hypothetical phage protein               |
| AFR72518.1 | - | - | - | - | - | + | - | - | - | - | - | - | - | - | + | - | NA      | NA | putative membrane protein                          |

|            |   |   |   |   |   |   |   |   |   |   |   |   |   |   |         |    |                                                   |
|------------|---|---|---|---|---|---|---|---|---|---|---|---|---|---|---------|----|---------------------------------------------------|
| ACY10753.1 | - | - | - | - | + | - | - | - | - | - | - | - | - | - | NA      | NA | hypothetical phage protein                        |
| ACY10754.1 | - | - | - | - | + | - | - | - | - | - | - | - | - | - | NA      | NA | conserved hypothetical phage protein              |
| ACY10755.1 | - | - | - | - | + | - | - | - | - | - | - | - | - | - | NA      | NA | putative phage replication protein                |
| ACY10756.1 | - | - | - | - | + | - | + | - | + | - | + | + | - | - | COG1484 | L  | DnaC                                              |
| ACY10757.1 | - | - | - | - | + | - | - | - | + | - | - | - | - | - | NA      | NA | conserved hypothetical phage protein              |
| ACY10760.1 | - | - | - | - | + | - | - | - | - | - | - | - | - | - | NA      | NA | PVL ORF-50 family protein                         |
| AFR72519.1 | + | - | + | - | + | - | - | + | - | - | + | - | - | - | COG0671 | I  | putative membrane protein                         |
| ACY10761.1 | - | - | - | - | + | - | - | - | - | - | - | - | - | - | NA      | NA | conserved hypothetical phage protein              |
| ACY10763.1 | - | - | - | - | + | - | - | - | - | - | - | - | - | - | NA      | NA | conserved hypothetical phage protein              |
| ACY10766.1 | - | - | - | - | + | - | - | - | - | - | + | + | - | - | NA      | NA | conserved hypothetical phage protein              |
| AFR72520.1 | - | - | + | - | + | - | - | + | - | - | + | - | - | - | COG1647 | Q  | hypothetical protein C248_0507                    |
| AFR72521.1 | + | - | + | - | + | - | - | + | - | - | + | - | - | - | COG0733 | R  | sodium:neurotransmitter symporter family protein  |
| ACY10790.1 | - | - | - | - | + | - | - | - | - | - | - | - | - | - | NA      | NA | holin, SPP1 family                                |
| AFR72522.1 | + | - | + | - | + | - | - | + | - | - | + | - | - | - | COG0031 | E  | pyridoxal-phosphate dependent enzyme              |
| ACY10791.1 | - | - | - | - | + | - | - | - | - | - | - | - | - | - | NA      | NA | phage amidase                                     |
| ACY10792.1 | - | - | - | - | + | - | - | - | - | - | - | - | - | - | NA      | NA | Ear-like protein                                  |
| ACY10793.1 | - | - | - | - | + | - | - | - | + | - | - | - | - | - | NA      | NA | hypothetical phage protein                        |
| ACY10794.1 | - | - | - | - | + | - | - | - | - | - | - | - | - | - | NA      | NA | hypothetical phage protein                        |
| ACY10795.1 | - | - | - | - | + | - | - | - | + | - | - | - | - | - | NA      | NA | hypothetical phage protein                        |
| AFR72523.1 | + | - | + | - | + | - | - | + | - | - | + | - | - | - | COG0626 | E  | putative Cys/Met metabolism PLP-dependent enzyme  |
| ACY11036.1 | - | - | - | - | + | - | - | - | + | - | - | - | - | - | NA      | NA | conserved hypothetical protein                    |
| ACY11038.1 | - | - | - | - | + | - | - | + | - | - | - | - | - | - | COG3464 | X  | IS1181 transposase                                |
| AFR72524.1 | + | - | + | - | + | - | - | + | - | - | + | - | - | - | COG1135 | E  | ABC transporter ATP-binding protein               |
| AFR72525.1 | - | - | - | - | + | - | - | - | - | - | + | - | - | - | COG2011 | E  | putative transport system membrane protein        |
| AFR72043.1 | + | - | - | - | - | - | - | - | - | - | - | - | - | - | NA      | NA | putative permease                                 |
| ACY11317.1 | - | - | - | - | + | - | - | - | + | - | - | - | - | - | NA      | NA | hypothetical protein SAAV_1415                    |
| ACY11319.1 | - | - | - | - | + | - | - | - | - | - | - | - | - | - | NA      | NA | surface protein, ECM binding protein-like protein |
| ACY11320.1 | - | - | - | - | + | - | - | - | - | - | - | - | - | - | NA      | NA | surface protein, ECM binding protein-like protein |
| ACY11321.1 | - | - | - | - | + | - | - | - | - | - | - | - | - | - | COG5281 | X  | surface protein, ECM binding protein-like protein |
| ACY11701.1 | - | - | - | - | + | - | - | - | - | - | - | - | - | - | COG2801 | X  | transposase                                       |
| ACY11702.1 | - | - | - | - | + | - | - | - | - | - | - | - | - | - | COG4584 | X  | transposase                                       |
| ACY11706.1 | - | - | - | - | + | - | - | - | - | - | + | - | - | - | COG3591 | E  | serine protease SplD, putative                    |
| ACY11709.1 | - | - | - | - | + | - | - | + | + | - | + | - | - | - | COG3591 | E  | serine protease SplA                              |
| ACY11711.1 | - | - | - | - | + | - | - | - | - | - | - | - | - | - | NA      | NA | hypothetical protein SAAV_1823                    |
| ACY11712.1 | - | - | - | - | + | - | - | - | + | - | - | - | - | - | NA      | NA | epidermin immunity protein F                      |
| ACY11713.1 | - | - | - | - | + | - | - | - | + | - | - | - | - | - | NA      | NA | conserved hypothetical protein                    |
| ACY11714.1 | - | - | - | - | + | - | - | - | + | - | - | - | - | - | NA      | NA | conserved hypothetical protein                    |
| ACY11715.1 | - | - | - | - | + | - | - | - | - | - | - | - | - | - | NA      | NA | hypothetical protein SAAV_1827                    |
| ACY11718.1 | - | - | - | - | + | - | + | - | - | - | - | - | - | - | NA      | NA | hypothetical protein SAAV_1830                    |
| ACY11722.1 | - | - | - | - | + | - | - | - | - | - | - | - | - | - | NA      | NA | staphylococcal enterotoxin G                      |
| ACY11723.1 | - | - | - | - | + | - | - | - | - | - | - | - | - | - | NA      | NA | staphylococcal enterotoxin N                      |
| ACY11724.1 | - | - | - | - | + | - | + | - | - | - | - | - | - | - | NA      | NA | staphylococcal enterotoxin Yent1                  |
| ACY11725.1 | - | - | - | - | + | - | - | - | - | - | - | - | - | - | NA      | NA | staphylococcal enterotoxin Yent2                  |
| ACY11727.1 | - | - | - | - | + | - | + | - | - | - | - | - | - | - | NA      | NA | staphylococcal enterotoxin M                      |
| ACY11728.1 | - | - | - | - | + | - | + | - | - | - | - | - | + | - | NA      | NA | staphylococcal enterotoxin O                      |
| AFR72582.1 | + | - | - | + | - | - | + | - | - | - | - | - | - | - | NA      | NA | hypothetical protein C248_0573                    |
| ACY11887.1 | - | - | - | - | + | - | - | - | - | - | - | - | - | - | NA      | NA | conserved hypothetical phage protein              |
| ACY11890.1 | - | - | - | - | + | - | - | - | - | - | - | - | - | - | NA      | NA | conserved hypothetical phage protein              |
| ACY11892.1 | - | - | - | - | + | - | - | - | - | - | - | - | - | - | NA      | NA | hypothetical phage protein                        |
| ACY12283.1 | - | - | - | - | + | - | - | - | - | - | + | + | - | - | COG2223 | P  | nitrite extrusion protein                         |
| AFR72044.1 | - | - | - | - | - | - | - | - | - | - | - | - | - | - | COG0524 | G  | putative kinase                                   |

|            |   |   |   |   |   |   |   |   |   |   |   |   |   |   |         |    |                                                                  |
|------------|---|---|---|---|---|---|---|---|---|---|---|---|---|---|---------|----|------------------------------------------------------------------|
| ACY12392.1 | - | - | - | - | + | - | - | - | - | - | - | - | - | - | NA      | NA | LPXTG-motif protein                                              |
| ACY12393.1 | - | - | - | - | + | - | + | - | + | - | - | - | - | - | COG1846 | K  | staphylococcal accessory regulator T                             |
| ACY12394.1 | - | - | - | - | + | - | - | + | - | - | - | - | - | - | COG1846 | K  | Staphylococcal accessory regulator U                             |
| ACY12397.1 | - | - | - | - | + | - | - | - | - | - | - | - | - | - | NA      | NA | hypothetical protein SAAV_2567                                   |
| ACY12604.1 | - | - | - | - | + | - | - | - | - | - | - | - | - | - | NA      | NA | hypothetical protein SAAV_2775                                   |
| ACY12606.1 | - | - | - | - | + | - | - | - | - | - | - | - | - | - | COG1476 | K  | transcriptional regulator, Cro/Ci family                         |
| AFR72869.1 | + | - | - | - | - | - | - | - | - | - | - | - | - | - | NA      | NA | hypothetical protein C248_0875                                   |
| ACY12607.1 | - | - | - | - | + | - | - | - | - | - | - | - | - | - | NA      | NA | hypothetical protein SAAV_2778                                   |
| ACY12608.1 | - | - | - | - | + | - | - | - | - | - | - | - | - | - | NA      | NA | hypothetical protein SAAV_2779                                   |
| ACY12609.1 | - | - | - | - | + | - | - | - | - | - | - | - | - | - | COG1475 | D  | ParB family chromosome partitioning protein                      |
| ACY12610.1 | - | - | - | - | + | - | - | - | - | - | - | - | - | - | COG0357 | J  | 16S rRNA methyltransferase GidB                                  |
| ACY12611.1 | - | - | - | - | + | - | - | - | - | - | - | - | - | - | COG0445 | J  | tRNA uridine 5-carboxymethylaminomethyl modification enzyme GidA |
| ACY12612.1 | - | - | - | - | + | - | - | - | - | - | - | - | - | - | COG0486 | J  | tRNA modification GTPase TrmE                                    |
| ACY12613.1 | - | - | - | - | + | - | - | - | - | - | - | - | - | - | COG0594 | J  | ribonuclease P protein component                                 |
| ACY12614.1 | - | - | - | - | + | - | - | - | - | - | - | - | - | - | COG0230 | J  | 50S ribosomal protein L34                                        |
| AFR72870.1 | - | - | - | - | + | - | - | - | - | - | - | - | - | - | NA      | NA | Hypothetical protein C248_0876                                   |
| ASC0314.1  | - | - | - | - | - | - | + | - | - | - | - | - | - | - | COG0557 | K  | ribonuclease R                                                   |
| ASC0315.1  | - | - | - | - | - | - | + | - | - | - | - | - | - | + | COG0691 | O  | SsrA-binding protein                                             |
| ASC0316.1  | - | - | - | - | - | - | - | - | - | - | - | - | - | - | NA      | NA | hypothetical protein A2V17_04080                                 |
| ASC0317.1  | - | - | - | - | - | - | + | - | + | - | - | - | - | - | NA      | NA | hypothetical protein A2V17_04085                                 |
| ASC0318.1  | - | - | - | - | - | - | - | - | - | - | - | - | - | - | NA      | NA | hypothetical protein A2V17_04090                                 |
| ASC0323.1  | - | - | - | - | - | - | + | - | - | - | - | - | - | - | NA      | NA | clumping factor A                                                |
| AFR72874.1 | + | - | - | - | - | - | - | - | - | - | - | - | - | - | NA      | NA | Putative coagulase                                               |
| AFR72875.1 | - | - | - | - | - | - | - | - | - | - | - | - | - | - | NA      | NA | von Willebrand factor binding protein                            |
| ASC0361.1  | - | - | - | - | - | - | + | - | - | - | - | - | - | - | NA      | NA | hypothetical protein A2V17_04305                                 |
| ASC0362.1  | - | - | - | - | - | - | + | - | - | - | - | - | - | - | COG0463 | M  | glycosyl transferase family A                                    |
| ASC0363.1  | - | - | - | - | - | - | - | - | - | - | - | - | - | - | COG1396 | K  | DNA-binding protein                                              |
| ASC0364.1  | - | - | - | - | - | - | + | - | - | - | - | - | - | - | NA      | NA | transcriptional regulator                                        |
| ASC52276.1 | - | - | - | - | - | - | + | - | - | - | - | - | - | - | NA      | NA | hypothetical protein A2V17_04325                                 |
| AFR72045.1 | + | - | - | - | - | - | - | - | - | - | - | - | + | + | COG3316 | X  | putative transposase                                             |
| ASC0366.1  | - | - | - | - | - | - | + | + | - | - | - | - | - | - | NA      | NA | hypothetical protein A2V17_04340                                 |
| ASC0375.1  | - | - | - | - | - | - | - | - | - | + | + | - | - | - | NA      | NA | replication protein                                              |
| ASC0386.1  | - | - | - | - | - | - | + | - | + | - | - | - | - | - | NA      | NA | hypothetical protein A2V17_04445                                 |
| AFR72879.1 | + | - | - | - | - | - | - | - | - | - | - | - | - | + | NA      | NA | Hypothetical protein C248_0885                                   |
| ASC0944.1  | - | - | - | - | - | - | - | - | - | - | - | - | - | - | NA      | NA | hypothetical protein A2V17_07350                                 |
| ASC0945.1  | - | - | - | - | - | - | + | - | - | - | - | - | - | - | NA      | NA | hypothetical protein A2V17_07355                                 |
| AFR72046.1 | + | - | - | - | - | - | - | - | - | - | - | - | - | - | NA      | NA | HMG-CoA synthase                                                 |
| AFR72028.1 | + | - | - | + | - | - | - | - | - | - | - | - | + | - | COG2021 | E  | putative hydrolase                                               |
| AFR72887.1 | + | - | - | - | - | - | - | - | - | - | - | - | - | - | COG0406 | G  | phosphoglycerate mutase family protein                           |
| ASC51455.1 | - | - | - | - | - | - | - | - | - | - | - | - | - | - | NA      | NA | hypothetical protein A2V17_10200                                 |
| ASC51456.1 | - | - | - | - | - | - | + | - | + | - | - | - | - | - | NA      | NA | hypothetical protein A2V17_10205                                 |
| ASC51569.1 | - | - | - | - | - | - | + | - | - | - | - | - | - | - | COG0394 | T  | arsenate reductase (thioredoxin)                                 |
| ASC51570.1 | - | - | - | - | - | - | - | - | - | - | - | - | - | - | NA      | NA | ATP-binding protein                                              |
| ASC51571.1 | - | - | - | - | - | - | + | - | - | - | - | - | - | - | COG2801 | X  | transposase                                                      |
| ASC51572.1 | - | - | - | - | - | - | + | - | - | - | - | - | + | - | COG1961 | L  | transposon DNA-invertase                                         |
| ASC51573.1 | - | - | - | - | - | - | + | + | - | - | - | - | - | - | COG3682 | K  | penicillinase repressor BlaI                                     |
| ASC51574.1 | - | - | - | - | - | - | + | + | - | - | - | - | - | - | COG2602 | V  | BlaR1 family beta-lactam sensor/signal transducer                |
| ASC51575.1 | - | - | - | - | - | - | - | - | - | - | - | - | - | - | COG2367 | V  | BlaZ family class A beta-lactamase                               |
| ASC51576.1 | - | - | - | - | - | - | + | - | - | - | - | - | - | - | NA      | NA | hypothetical protein A2V17_10870                                 |
| ASC51577.1 | - | - | - | - | - | - | + | - | - | - | - | - | - | - | COG0640 | K  | transcriptional regulator                                        |
| ASC51578.1 | - | - | - | - | - | - | - | - | - | - | - | - | - | - | COG0701 | S  | permease                                                         |

|            |   |   |   |   |   |   |   |   |   |   |   |   |   |         |         |                                                    |                               |
|------------|---|---|---|---|---|---|---|---|---|---|---|---|---|---------|---------|----------------------------------------------------|-------------------------------|
| ASC51579.1 | - | - | - | - | - | - | - | + | - | - | - | - | - | -       | NA      | NA                                                 | methyltransferase             |
| AFR72892.1 | + | - | - | - | - | - | - | - | - | - | - | - | - | -       | COG0778 | C                                                  | nitroreductase family protein |
| AFR72964.1 | - | - | - | - | - | - | - | - | - | - | - | - | + | COG0179 | Q       | fumarylacetoacetate (FAA) hydrolase family protein |                               |
| AFR72965.1 | + | - | - | - | - | - | - | - | - | - | - | - | + | NA      | NA      | putative membrane protein                          |                               |
| ASC52030.1 | - | - | - | - | - | - | - | - | + | - | - | - | - | NA      | NA      | hypothetical protein A2V17_13270                   |                               |
| ASC52031.1 | - | - | - | - | - | - | - | + | - | - | - | - | - | NA      | NA      | Accumulation-associated protein                    |                               |
| AFR72047.1 | + | - | - | - | - | - | - | - | - | - | - | - | - | NA      | NA      | putative membrane protein                          |                               |
| CCC86798.1 | - | - | - | - | - | - | - | - | - | - | - | - | - | NA      | NA      | putative membrane protein                          |                               |
| CCC86799.1 | - | - | - | - | - | - | - | + | - | - | - | - | - | NA      | NA      | putative exported protein                          |                               |
| CCC86800.1 | - | - | - | - | - | - | - | + | - | - | - | - | - | NA      | NA      | conserved hypothetical protein                     |                               |
| CCC86801.1 | - | - | - | - | - | - | - | - | - | - | - | - | - | COG2003 | L       | conserved hypothetical protein                     |                               |
| CCC86828.1 | - | - | - | - | - | - | - | + | - | - | - | - | - | NA      | NA      | putative membrane protein                          |                               |
| CCC86829.1 | - | - | - | - | - | - | - | + | - | - | - | - | - | NA      | NA      | hypothetical protein SARLGA251_00600               |                               |
| CCC86830.1 | - | - | - | - | - | - | - | + | + | - | - | - | - | NA      | NA      | hypothetical protein SARLGA251_00610               |                               |
| AFR72967.1 | + | - | - | - | - | - | - | - | - | - | - | - | - | NA      | NA      | hypothetical protein C248_0973                     |                               |
| CCC86837.1 | - | - | - | - | - | - | - | - | - | - | - | - | - | COG0589 | T       | hypothetical protein SARLGA251_00680               |                               |
| CCC86840.1 | - | - | - | - | - | - | - | + | - | - | - | - | - | COG2814 | G       | Major Facilitator Superfamily protein              |                               |
| CCC86841.1 | - | - | - | - | - | - | - | + | - | - | - | - | - | COG0655 | C       | conserved hypothetical protein                     |                               |
| AFR72969.1 | - | - | - | - | - | - | - | - | - | - | - | - | - | NA      | NA      | hypothetical protein C248_0975                     |                               |
| CCC86842.1 | - | - | - | - | - | - | - | + | - | - | - | - | - | COG0583 | K       | LysR family regulatory protein                     |                               |
| CCC87126.1 | - | - | - | - | - | - | - | + | + | - | - | - | - | COG1683 | S       | conserved hypothetical protein                     |                               |
| CCC87182.1 | - | - | - | - | - | - | - | + | - | - | - | - | - | NA      | NA      | putative membrane protein                          |                               |
| CCC87223.1 | - | - | - | - | - | - | - | + | - | - | - | - | - | NA      | NA      | hypothetical protein SARLGA251_04550               |                               |
| AFR72048.1 | - | - | - | - | - | - | - | - | - | - | - | - | + | COG0584 | I       | glycerophosphoryl diester phosphodiesterase        |                               |
| CCC87516.1 | - | - | - | - | - | - | - | + | - | - | - | + | - | NA      | NA      | pathogenicity island protein                       |                               |
| AFR72978.1 | + | - | - | - | + | - | - | - | - | - | - | - | + | NA      | NA      | hypothetical protein C248_0984                     |                               |
| CCC87522.1 | - | - | - | - | - | - | - | + | - | - | - | - | - | NA      | NA      | pathogenicity island protein                       |                               |
| CCC87523.1 | - | - | - | - | - | - | - | + | - | - | - | - | - | NA      | NA      | pathogenicity island replication protein           |                               |
| CCC87524.1 | - | - | - | - | - | - | - | + | - | - | - | - | - | NA      | NA      | pathogenicity island protein                       |                               |
| CCC87527.1 | - | - | - | - | - | - | - | + | - | - | - | - | - | NA      | NA      | pathogenicity island protein                       |                               |
| CCC87528.1 | - | - | - | - | - | - | - | + | - | - | - | - | - | NA      | NA      | pathogenicity island protein                       |                               |
| CCC87536.1 | - | - | - | - | - | - | - | + | - | - | - | - | - | NA      | NA      | pathogenicity island protein                       |                               |
| CCC87538.1 | - | - | - | - | - | - | - | + | - | - | - | - | - | COG2035 | S       | putative membrane protein                          |                               |
| CCC87539.1 | - | - | - | - | - | - | - | + | - | - | - | - | - | COG0396 | O       | ABC transporter ATP-binding protein                |                               |
| CCC87540.1 | - | - | - | - | - | - | - | + | - | - | - | - | - | COG0719 | O       | conserved hypothetical protein                     |                               |
| CCC87541.1 | - | - | - | - | - | - | - | + | - | - | - | - | - | COG0520 | E       | putative selenocysteine lyase                      |                               |
| CCC87542.1 | - | - | - | - | - | - | - | + | - | - | - | - | - | COG0822 | O       | NifU-like protein                                  |                               |
| CCC87545.1 | - | - | - | - | - | - | - | + | - | - | - | - | - | NA      | NA      | phage protein                                      |                               |
| CCC87547.1 | - | - | - | - | - | - | - | + | - | - | - | - | - | NA      | NA      | phage DNA-binding protein                          |                               |
| CCC87548.1 | - | - | - | - | - | - | - | + | - | - | - | - | - | NA      | NA      | phage protein                                      |                               |
| CCC87549.1 | - | - | - | - | - | - | - | + | - | - | - | - | - | NA      | NA      | phage protein                                      |                               |
| AFR72982.1 | + | - | - | - | + | - | - | - | - | - | - | - | - | NA      | NA      | hypothetical protein C248_0988                     |                               |
| CCC87565.1 | - | - | - | - | - | - | - | + | - | - | - | - | - | NA      | NA      | phage protein                                      |                               |
| CCC87568.1 | - | - | - | - | - | - | - | + | - | + | - | - | + | NA      | NA      | phage protein                                      |                               |
| CCC87582.1 | - | - | - | - | - | - | - | + | - | - | - | - | - | NA      | NA      | phage protein                                      |                               |
| CCC87589.1 | - | - | - | - | - | - | - | + | - | - | - | - | - | NA      | NA      | phage protein                                      |                               |
| AFR72986.1 | + | - | - | - | - | - | - | - | - | - | - | - | - | NA      | NA      | hypothetical protein C248_0992                     |                               |
| AFR72049.1 | - | - | - | - | - | - | - | - | - | - | - | - | + | COG2030 | I       | acyl dehydratase                                   |                               |
| AFR72988.1 | + | - | - | - | - | - | - | - | - | - | - | - | - | NA      | NA      | Putative transposase                               |                               |
| CCC88454.1 | - | - | - | - | - | - | - | + | - | - | - | - | - | COG0739 | M       | peptidase family M23/M37 protein                   |                               |
| CCC88458.1 | - | - | - | - | - | - | - | + | - | + | - | - | - | COG3591 | E       | serine protease                                    |                               |



|                   |   |   |   |   |   |   |   |   |   |   |   |   |   |   |         |         |                                                    |                                        |
|-------------------|---|---|---|---|---|---|---|---|---|---|---|---|---|---|---------|---------|----------------------------------------------------|----------------------------------------|
| CCC88475.1        | - | - | - | - | - | - | - | - | + | - | - | - | - | - | NA      | NA      | hypothetical protein SARLGA251_17100               |                                        |
| AFR72993.1        | + | - | - | - | - | - | - | - | - | - | - | - | - | - | NA      | NA      | hypothetical protein C248_0999                     |                                        |
| CCC89034.1        | - | - | - | - | - | - | - | - | + | + | - | - | - | - | NA      | NA      | putative helicase                                  |                                        |
| CCC89035.1        | - | - | - | - | - | - | - | - | + | + | - | - | - | - | COG0494 | V       | putative NUDIX hydrolase                           |                                        |
| AFR73173.1        | + | - | - | - | - | + | + | - | + | + | - | - | - | + | +       | COG0622 | R                                                  | hypothetical protein C248_1181         |
| AFR73174.1        | + | - | - | + | - | + | + | - | - | - | - | - | - | + | +       | NA      | NA                                                 | Hypothetical protein C248_1182         |
| AFR72050.1        | + | - | - | - | - | - | - | - | + | - | - | - | - | + | +       | COG0768 | DM                                                 | penicillin-binding protein 2 prime     |
| SaureusN305_00073 | - | - | - | - | - | - | - | - | + | - | - | - | - | + | -       | NA      | NA                                                 | TSorf172 domain protein                |
| SaureusN305_00074 | - | - | - | - | - | - | - | - | + | - | - | - | - | + | -       | NA      | NA                                                 | hypothetical protein                   |
| AFR73175.1        | + | - | - | + | - | + | + | - | + | + | - | - | - | + | +       | NA      | NA                                                 | putative exported protein              |
| SaureusN305_00083 | - | - | - | - | - | - | - | - | + | - | - | - | - | - | COG3591 | E       | Serine protease SpIC precursor                     |                                        |
| SaureusN305_00084 | - | - | - | - | - | - | - | - | + | - | - | - | - | - | NA      | NA      | Serine protease SpIC precursor                     |                                        |
| AFR73176.1        | + | - | - | + | - | + | + | - | + | + | - | - | - | + | +       | NA      | NA                                                 | FPRL1 inhibitory protein               |
| AFR73177.1        | + | - | - | + | - | + | + | - | + | + | - | - | - | + | +       | NA      | NA                                                 | putative membrane protein              |
| SaureusN305_00161 | - | - | - | - | - | - | - | - | + | - | - | + | - | + | COG0624 | E       | Putative dipeptidase                               |                                        |
| SaureusN305_00368 | - | - | - | - | - | - | - | - | + | - | - | - | - | - | NA      | NA      | hypothetical protein                               |                                        |
| SaureusN305_00371 | - | - | - | - | - | - | - | - | + | - | - | - | - | - | NA      | NA      | Surface protein G precursor                        |                                        |
| AFR73178.1        | + | - | + | - | + | + | - | + | + | - | - | - | - | + | +       | NA      | NA                                                 | fibrinogen-binding protein precursor   |
| AFR73179.1        | + | - | + | - | + | + | - | + | + | - | - | - | - | + | +       | NA      | NA                                                 | putative exported protein              |
| SaureusN305_00384 | - | - | - | - | - | - | - | - | + | + | - | - | - | + | -       | NA      | NA                                                 | hypothetical protein                   |
| SaureusN305_00385 | - | - | - | - | - | - | - | - | + | - | - | - | - | + | -       | NA      | NA                                                 | putative sulfoacetate transporter SauU |
| SaureusN305_00386 | - | - | - | - | - | - | - | - | + | - | - | - | - | + | -       | COG0586 | S                                                  | Inner membrane protein YqjA            |
| SaureusN305_00626 | - | - | - | - | - | - | - | - | + | - | - | - | - | - | COG0042 | J       | putative tRNA-dihydrouridine synthase              |                                        |
| AFR73180.1        | + | - | - | - | + | + | - | + | + | - | - | - | - | + | +       | NA      | NA                                                 | Hypothetical protein C248_1188         |
| SaureusN305_00637 | - | - | - | - | - | - | - | - | + | - | - | - | - | - | NA      | NA      | 1-phosphatidylinositol phosphodiesterase precursor |                                        |
| AFR73181.1        | + | - | - | - | + | + | - | + | + | - | - | - | - | + | +       | NA      | NA                                                 | hypothetical protein C248_1189         |
| SaureusN305_00938 | - | - | - | - | - | - | - | - | + | - | - | - | - | - | NA      | NA      | Helix-turn-helix                                   |                                        |
| SaureusN305_00939 | - | - | - | - | - | - | - | - | + | - | - | - | - | - | NA      | NA      | Helix-turn-helix                                   |                                        |
| AFR73182.1        | + | - | - | - | + | + | - | + | + | - | - | - | - | + | +       | NA      | NA                                                 | Alpha-hemolysin                        |
| SaureusN305_00948 | - | - | - | - | - | - | - | - | + | - | - | - | - | - | NA      | NA      | hypothetical protein                               |                                        |
| SaureusN305_00949 | - | - | - | - | - | - | - | - | + | - | - | - | - | - | NA      | NA      | Aminodeoxyfualosine deaminase                      |                                        |
| SaureusN305_00952 | - | - | - | - | - | - | - | - | + | - | - | - | - | - | NA      | NA      | hypothetical protein                               |                                        |
| SaureusN305_00953 | - | - | - | - | - | - | - | - | + | - | - | - | - | - | NA      | NA      | hypothetical protein                               |                                        |
| SaureusN305_00955 | - | - | - | - | - | - | - | - | + | - | - | - | - | - | NA      | NA      | hypothetical protein                               |                                        |

|                   |   |   |   |   |   |   |   |   |   |   |   |   |   |   |         |    |                                                  |
|-------------------|---|---|---|---|---|---|---|---|---|---|---|---|---|---|---------|----|--------------------------------------------------|
| AFR73183.1        | + | - | + | + | + | + | - | + | + | - | - | - | + | + | NA      | NA | hypothetical protein C248_1191                   |
| SaureusN305_00960 | - | - | - | - | - | - | - | - | + | - | - | - | - | - | NA      | NA | hypothetical protein                             |
| AFR73184.1        | + | - | + | - | + | + | - | + | + | - | - | - | + | + | NA      | NA | exotoxin                                         |
| AFR72051.1        | + | - | - | - | - | - | - | - | - | - | - | - | - | - | COG3316 | X  | Transposase for insertion sequence element IS431 |
| AFR73185.1        | + | - | + | - | + | + | - | + | + | - | - | - | + | + | NA      | NA | exotoxin                                         |
| SaureusN305_01293 | - | - | - | - | - | - | - | - | + | - | - | - | - | - | NA      | NA | Clumping factor A precursor                      |
| AFR73186.1        | + | - | + | - | + | + | - | + | - | - | - | - | + | + | NA      | NA | exotoxin                                         |
| AFR73187.1        | + | - | + | - | + | + | - | + | + | - | - | - | + | + | COG0078 | E  | ornithine carbamoyltransferase                   |
| AFR73188.1        | + | - | + | - | + | + | - | + | + | - | - | - | + | + | COG0549 | E  | putative carbamate kinase                        |
| AFR73189.1        | + | - | + | - | + | + | - | + | + | - | - | - | + | + | COG1288 | R  | putative membrane protein                        |
| AFR73190.1        | - | - | - | - | + | - | - | + | + | - | - | - | - | - | NA      | NA | putative membrane protein                        |
| SaureusN305_01842 | - | - | - | - | - | - | - | - | + | - | - | - | - | - | NA      | NA | hypothetical protein                             |
| SaureusN305_01843 | - | - | - | - | - | - | - | - | + | - | - | - | - | - | NA      | NA | hypothetical protein                             |
| SaureusN305_01851 | - | - | - | - | - | - | - | - | + | - | - | - | - | - | NA      | NA | hypothetical protein                             |
| SaureusN305_01852 | - | - | - | - | - | - | - | - | + | - | - | - | - | - | COG0286 | V  | N-6 DNA Methylase                                |
| AFR73191.1        | + | - | + | - | + | + | - | + | + | - | - | - | + | + | COG1275 | V  | exfoliative toxin A/B                            |
| SaureusN305_01854 | - | - | - | - | - | - | - | - | + | - | - | - | - | - | NA      | NA | hypothetical protein                             |
| SaureusN305_01856 | - | - | - | - | - | - | - | - | + | - | - | - | - | - | NA      | NA | hypothetical protein                             |
| SaureusN305_01858 | - | - | - | - | - | - | - | - | + | - | - | - | - | - | NA      | NA | hypothetical protein                             |
| SaureusN305_01860 | - | - | - | - | - | - | - | - | + | - | - | - | - | - | NA      | NA | hypothetical protein                             |
| AFR73192.1        | + | - | + | - | + | + | - | + | + | - | - | - | + | + | NA      | NA | putative DNA binding protein                     |
| SaureusN305_01889 | - | - | - | - | - | - | - | - | + | - | - | - | - | - | NA      | NA | Phage tail repeat like protein                   |
| SaureusN305_01890 | - | - | - | - | - | - | - | - | + | - | - | - | - | - | NA      | NA | hypothetical protein                             |
| AFR73193.1        | + | - | + | - | + | + | - | + | + | - | - | - | - | + | NA      | NA | antibacterial protein                            |
| SaureusN305_01962 | - | - | - | - | - | - | - | - | + | - | - | - | - | - | NA      | NA | Tyrosine recombinase XerD                        |
| SaureusN305_01963 | - | - | - | - | - | - | - | - | + | - | - | - | - | - | COG0582 | LX | site-specific tyrosine recombinase XerC          |
| SaureusN305_01964 | - | - | - | - | - | - | - | - | + | - | + | - | - | - | NA      | NA | Host cell surface-exposed lipoprotein            |
| SaureusN305_01965 | - | - | - | - | - | - | - | - | + | - | - | - | - | - | NA      | NA | hypothetical protein                             |
| SaureusN305_01966 | - | - | - | - | - | - | - | - | + | - | - | - | - | - | NA      | NA | transcriptional repressor DicA                   |
| SaureusN305_01968 | - | - | - | - | - | - | - | - | + | - | - | - | - | - | NA      | NA | hypothetical protein                             |
| SaureusN305_01969 | - | - | - | - | - | - | - | - | + | - | - | - | - | - | NA      | NA | hypothetical protein                             |
| SaureusN305_1970  | - | - | - | - | - | - | - | - | + | - | - | - | - | - | NA      | NA | hypothetical protein                             |
| SaureusN305_      | - | - | - | - | - | - | - | - | + | - | - | - | - | - | NA      | NA | hypothetical protein                             |



|                  |   |   |   |   |   |   |   |   |   |   |   |   |   |   |    |         |                                |                                                           |
|------------------|---|---|---|---|---|---|---|---|---|---|---|---|---|---|----|---------|--------------------------------|-----------------------------------------------------------|
| SaureusN305_2006 | - | - | - | - | - | - | - | - | - | + | - | - | - | - | -  | NA      | NA                             | hypothetical protein                                      |
| SaureusN305_2007 | - | - | - | - | - | - | - | - | - | + | - | - | - | - | -  | NA      | NA                             | hypothetical protein                                      |
| SaureusN305_2008 | - | - | - | - | - | - | - | - | - | + | - | - | - | - | -  | NA      | NA                             | Holin family protein                                      |
| SaureusN305_2009 | - | - | - | - | - | - | - | - | - | + | - | - | - | - | -  | NA      | NA                             | N-acetylmuramoyl-L-alanine amidase CwIA precursor         |
| SaureusN305_2140 | - | - | - | - | - | - | - | - | - | + | - | - | - | - | -  | NA      | NA                             | Extracellular matrix-binding protein EbhA                 |
| AFR73461.1       | + | - | + | + | - | - | + | + | - | - | - | - | + | - | NA | NA      | hypothetical protein C248_1471 |                                                           |
| SaureusN305_2292 | - | - | - | - | - | - | - | - | - | + | - | - | - | + | -  | NA      | NA                             | putative MFS-type transporter EfpA                        |
| SaureusN305_2293 | - | - | - | - | - | - | - | - | - | + | - | - | - | + | -  | NA      | NA                             | hypothetical protein                                      |
| SaureusN305_2295 | - | - | - | - | - | - | - | - | - | + | - | - | - | - | -  | NA      | NA                             | hypothetical protein                                      |
| SaureusN305_2299 | - | - | - | - | - | - | - | - | - | + | - | - | - | - | -  | COG0614 | P                              | Iron(3+)-hydroxamate-binding protein PhuD precursor       |
| SaureusN305_2300 | - | - | - | - | - | - | - | - | - | + | - | - | - | - | -  | COG3315 | Q                              | Leucine carboxyl methyltransferase                        |
| SaureusN305_2303 | - | - | - | - | - | - | - | - | - | + | - | + | - | - | -  | NA      | NA                             | putative leukocidin-like protein 1 precursor              |
| SaureusN305_2309 | - | - | - | - | - | - | - | - | - | + | - | + | - | - | +  | COG1131 | V                              | ABC transporter ATP-binding protein YtrB                  |
| SaureusN305_2310 | - | - | - | - | - | - | - | - | - | + | - | + | - | - | +  | NA      | NA                             | hypothetical protein                                      |
| SaureusN305_2312 | - | - | - | - | - | - | - | - | - | + | - | + | - | - | +  | NA      | NA                             | ABC-2 family transporter protein                          |
| SaureusN305_2313 | - | - | - | - | - | - | - | - | - | + | - | + | - | - | +  | COG0526 | O                              | hypothetical protein                                      |
| SaureusN305_2314 | - | - | - | - | - | - | - | - | - | + | - | + | - | - | +  | NA      | NA                             | hypothetical protein                                      |
| SaureusN305_2315 | - | - | - | - | - | - | - | - | - | + | - | + | - | - | +  | NA      | NA                             | hypothetical protein                                      |
| SaureusN305_2316 | - | - | - | - | - | - | - | - | - | + | - | + | - | - | -  | NA      | NA                             | hypothetical protein                                      |
| SaureusN305_2317 | - | - | - | - | - | - | - | - | - | + | - | + | - | - | -  | COG4927 | R                              | Acyl-coenzyme A:6-aminopenicillanic acid acyl-transferase |
| SaureusN305_2318 | - | - | - | - | - | - | - | - | - | + | - | + | - | - | -  | NA      | NA                             | hypothetical protein                                      |
| SaureusN305_2319 | - | - | - | - | - | - | - | - | - | + | - | + | - | - | -  | NA      | NA                             | YolD-like protein                                         |
| SaureusN305_2320 | - | - | - | - | - | - | - | - | - | + | - | + | - | - | -  | COG2706 | G                              | 6-phosphogluconolactonase                                 |
| SaureusN305_2321 | - | - | - | - | - | - | - | - | - | + | - | + | - | - | -  | COG1012 | C                              | Aldehyde dehydrogenase                                    |
| SaureusN305_2322 | - | - | - | - | - | - | - | - | - | + | - | + | - | - | -  | COG1227 | CP                             | putative manganese-dependent inorganic pyrophosphatase    |
| SaureusN305_2323 | - | - | - | - | - | - | - | - | - | + | - | + | - | - | -  | COG1335 | HR                             | Peroxyureidoacrylate/ureidoacrylate amidohydrolase RutB   |
| SaureusN305_2324 | - | - | - | - | - | - | - | - | - | + | - | + | - | - | -  | NA      | NA                             | Plasmin and fibronectin-binding protein A precursor       |

|                  |   |   |   |   |   |   |   |   |   |   |   |   |   |   |   |         |    |                                                        |
|------------------|---|---|---|---|---|---|---|---|---|---|---|---|---|---|---|---------|----|--------------------------------------------------------|
| SaureusN305_2325 | - | - | - | - | - | - | - | - | - | + | - | + | - | - | - | COG0471 | G  | Sodium-dependent dicarboxylate transporter SdcS        |
| SaureusN305_2326 | - | - | - | - | - | - | - | - | - | + | - | + | - | - | - | COG0077 | E  | P-protein                                              |
| SaureusN305_2327 | - | - | - | - | - | - | - | - | - | + | - | + | - | - | - | COG4362 | P  | Nitric oxide synthase oxygenase                        |
| SaureusN305_2328 | - | - | - | - | - | - | - | - | - | + | - | + | - | - | - | COG1488 | H  | Nicotinate phosphoribosyltransferase pncB2             |
| SaureusN305_2355 | - | - | - | - | - | - | - | - | - | + | - | + | - | - | - | NA      | NA | hypothetical protein                                   |
| SaureusN305_2356 | - | - | - | - | - | - | - | - | - | + | - | + | - | - | - | COG4758 | S  | hypothetical protein                                   |
| SaureusN305_2357 | - | - | - | - | - | - | - | - | - | + | - | + | - | - | - | COG4585 | T  | Sensor protein VraS                                    |
| SaureusN305_2359 | - | - | - | - | - | - | - | - | - | + | - | + | - | - | - | COG1295 | S  | hypothetical protein                                   |
| SaureusN305_2360 | - | - | - | - | - | - | - | - | - | + | - | + | - | - | - | NA      | NA | hypothetical protein                                   |
| SaureusN305_2361 | - | - | - | - | - | - | - | - | - | + | - | + | + | - | - | COG0394 | T  | Low molecular weight protein-tyrosine-phosphatase PtpA |
| AFR72053.1       | + | - | - | - | - | - | - | - | - | - | - | - | - | - | + | NA      | NA | hypothetical protein C248_0039                         |
| SaureusN305_2362 | - | - | - | - | - | - | - | - | - | + | - | + | + | - | - | NA      | NA | hypothetical protein                                   |
| SaureusN305_2363 | - | - | - | - | - | - | - | - | - | + | - | + | + | - | - | COG2309 | E  | Aminopeptidase PepS                                    |
| SaureusN305_2364 | - | - | - | - | - | - | - | - | - | + | - | + | + | - | - | COG1607 | I  | putative acyl-CoA thioester hydrolase                  |
| SaureusN305_2365 | - | - | - | - | - | - | - | - | - | + | - | + | + | - | - | COG0535 | R  | 7-carboxy-7-deazaguanine synthase                      |
| SaureusN305_2366 | - | - | - | - | - | - | - | - | - | + | - | - | - | - | - | NA      | NA | hypothetical protein                                   |
| SaureusN305_2367 | - | - | - | - | - | - | - | - | - | + | - | - | - | - | - | COG0693 | R  | Putative cysteine protease YraA                        |
| SaureusN305_2368 | - | - | - | - | - | - | - | - | - | + | - | - | - | - | - | COG0744 | M  | Monofunctional glycosyltransferase                     |
| SaureusN305_2369 | - | - | - | - | - | - | - | - | - | + | - | - | - | - | - | COG2137 | O  | Regulatory protein RecX                                |
| SaureusN305_2370 | - | - | - | - | - | - | - | - | - | + | - | - | - | - | - | NA      | NA | hypothetical protein                                   |
| SaureusN305_2371 | - | - | - | - | - | - | - | - | - | + | - | - | - | - | - | COG1134 | GM | Teichoic acids export ATP-binding protein TagH         |
| SaureusN305_2431 | - | - | - | - | - | - | - | - | - | + | - | - | - | - | - | NA      | NA | Putative surface protein precursor                     |
| SaureusN305_2440 | - | - | - | - | - | - | - | - | - | + | + | - | - | - | - | NA      | NA | putative lipoprotein precursor                         |
| SaureusN305_2442 | - | - | - | - | - | - | - | - | - | + | - | - | - | - | - | NA      | NA | hypothetical protein                                   |
| SaureusN305_2444 | - | - | - | - | - | - | - | - | - | + | + | - | - | - | - | NA      | NA | hypothetical protein                                   |
| SaureusN305_2445 | - | - | - | - | - | - | - | - | - | + | + | - | - | - | - | COG4221 | C  | putative oxidoreductase                                |
| AFR72054.1       | + | - | - | - | - | - | - | - | - | - | - | - | - | - | + | NA      | NA | hypothetical protein C248_0040                         |
| AFR73801.1       | + | - | + | - | - | - | + | - | - | - | - | - | - | - | + | NA      | NA | Hypothetical Protein C248_1811                         |

|                           |   |   |   |   |   |   |   |   |   |   |   |   |   |   |         |    |                                                         |                                     |
|---------------------------|---|---|---|---|---|---|---|---|---|---|---|---|---|---|---------|----|---------------------------------------------------------|-------------------------------------|
| SaureusNZMR<br>0322_01447 | - | - | - | - | - | - | - | - | - | - | - | - | - | - | -       | NA | NA                                                      | chromosome segregation protein      |
| SaureusNZMR<br>0322_01754 | - | - | - | - | - | - | - | - | - | - | - | - | - | - | -       | NA | NA                                                      | ribulose-1,5-biphosphate synthetase |
| AFR73803.1                | + | - | + | - | - | + | - | - | - | - | - | - | - | - | COG0054 | H  | 6,7-dimethyl-8-ribityllumazine synthase                 |                                     |
| AFR73835.1                | + | - | + | - | + | + | - | - | - | - | - | - | + | + | NA      | NA | putative lipoprotein                                    |                                     |
| SaureusNZMR<br>0322_01857 | - | - | - | - | - | - | - | - | - | - | - | - | - | - | NA      | NA | hypothetical protein                                    |                                     |
| AFR73836.1                | + | - | + | - | + | + | - | - | - | - | - | - | + | + | NA      | NA | hypothetical protein C248_1846                          |                                     |
| SaureusNZMR<br>0322_01897 | - | - | - | - | - | - | - | - | - | - | - | - | - | - | NA      | NA | hypothetical protein                                    |                                     |
| SaureusNZMR<br>0322_02007 | - | - | - | - | - | - | - | - | - | - | - | - | - | - | COG0533 | J  | tRNA N6-adenosine threonylcarbamoyltransferase          |                                     |
| SaureusNZMR<br>0322_02008 | - | - | - | - | - | - | - | - | - | - | - | - | - | - | COG0456 | J  | ribosomal-protein-alanine N-acetyltransferase           |                                     |
| SaureusNZMR<br>0322_02009 | - | - | - | - | - | - | - | - | - | - | - | - | - | - | COG1214 | J  | tRNA threonylcarbamoyladenine biosynthesis protein TsaB |                                     |
| SaureusNZMR<br>0322_02010 | - | - | - | - | - | - | - | - | - | - | - | - | - | - | COG0802 | J  | tRNA threonylcarbamoyladenine biosynthesis protein TsaE |                                     |
| AFR73837.1                | + | - | + | - | + | + | - | - | - | - | - | - | + | + | NA      | NA | hypothetical protein C248_1847                          |                                     |
| SaureusNZMR<br>0322_02011 | - | - | - | - | - | - | - | - | - | - | - | - | - | - | COG0129 | EG | Dihydroxy-acid dehydratase                              |                                     |
| SaureusNZMR<br>0322_02020 | - | - | - | - | - | - | - | - | - | - | - | - | - | - | NA      | NA | Cell wall-associated hydrolase                          |                                     |
| AFR73838.1                | + | - | + | - | - | - | - | - | - | - | - | - | - | + | NA      | NA | hypothetical protein C248_1848                          |                                     |
| AFR73839.1                | + | - | + | - | - | - | - | - | - | - | - | - | - | + | NA      | NA | hypothetical protein C248_1849                          |                                     |
| SaureusNZMR<br>0322_02123 | - | - | - | - | - | - | - | - | - | - | - | - | - | - | NA      | NA | Transposon Tn7 transposition protein TnsC               |                                     |
| SaureusNZMR<br>0322_02124 | - | - | - | - | - | - | - | - | - | - | - | - | - | - | COG3464 | X  | Transposase                                             |                                     |
| SaureusNZMR<br>0322_02125 | - | - | - | - | - | - | - | - | - | - | - | - | - | - | COG3666 | X  | Transposase DDE domain protein                          |                                     |
| SaureusNZMR<br>0322_02126 | - | - | - | - | - | - | - | - | - | - | - | - | - | - | COG3666 | X  | hypothetical protein                                    |                                     |
| AFR73840.1                | + | - | + | - | - | - | - | - | - | - | - | - | - | + | NA      | NA | hypothetical protein C248_1850                          |                                     |
| AFR72055.1                | - | - | - | - | - | - | - | - | - | - | - | - | - | - | NA      | NA | hypothetical protein C248_0041                          |                                     |
| AFR73841.1                | + | - | + | - | - | - | - | - | - | - | - | - | - | + | NA      | NA | Transposase                                             |                                     |
| AFR73843.1                | + | - | + | - | - | - | - | - | - | - | - | - | - | + | NA      | NA | Hypothetical protein C248_1853                          |                                     |
| SaureusNZMR<br>0322_02186 | - | - | - | - | - | - | - | - | - | - | - | - | - | - | NA      | NA | hypothetical protein                                    |                                     |
| SaureusNZMR<br>0322_02187 | - | - | - | - | - | - | - | - | - | - | - | - | - | - | NA      | NA | hypothetical protein                                    |                                     |
| SaureusNZMR<br>0322_02188 | - | - | - | - | - | - | - | - | - | - | - | - | - | + | NA      | NA | YopX protein                                            |                                     |
| AFR73844.1                | + | - | + | - | + | - | - | - | - | - | - | - | + | + | NA      | NA | hypothetical protein C248_1854                          |                                     |
| AFR73845.1                | - | - | - | - | - | - | - | - | - | - | - | - | - | - | NA      | NA | putative exported protein                               |                                     |
| SaureusNZMR<br>0322_02211 | - | - | - | - | - | - | - | - | - | - | - | - | - | - | NA      | NA | hypothetical protein                                    |                                     |
| SaureusNZMR<br>0322_02212 | - | - | - | - | - | - | - | - | - | - | - | - | - | - | NA      | NA | hypothetical protein                                    |                                     |
| AFR73846.1                | + | - | + | - | - | - | - | - | - | - | - | - | + | + | NA      | NA | hyaluronate lyase precursor 1                           |                                     |
| AFR73847.1                | + | - | + | - | + | + | - | - | - | - | - | - | + | + | NA      | NA | putative exported protein                               |                                     |
| SaureusNZMR               | - | - | - | - | - | - | - | - | - | - | - | - | - | - | COG1251 | C  | Nitrite reductase (NAD(P)H)                             |                                     |



|            |   |   |   |   |   |   |   |   |   |   |   |   |   |   |   |         |    |                                                            |
|------------|---|---|---|---|---|---|---|---|---|---|---|---|---|---|---|---------|----|------------------------------------------------------------|
| AFR72057.1 | + | - | - | - | - | - | - | - | - | - | - | - | - | - | + | NA      | NA | hypothetical protein C248_0043                             |
| ATV03361.1 | - | - | - | - | - | - | - | - | - | - | - | - | - | - | - | NA      | NA | Putative deoxyadenosine kinase protein                     |
| AFR74023.1 | - | - | - | + | - | - | - | - | - | - | + | + | - | - | + | COG2183 | K  | putative RNA binding protein                               |
| ATV04437.1 | - | - | - | - | - | - | - | - | - | - | - | + | + | - | - | NA      | NA | Hypothetical protein SaO11_01611                           |
| ATV04473.1 | - | - | - | - | - | - | - | - | - | - | - | + | - | - | - | NA      | NA | hypothetical protein SaO11_01647                           |
| ATV04475.1 | - | - | - | - | - | - | - | - | - | - | - | + | - | - | - | NA      | NA | Putative membrane protein                                  |
| ATV04477.1 | - | - | - | - | - | - | - | - | - | - | - | + | - | - | - | NA      | NA | NTPase                                                     |
| ATV04535.1 | - | - | - | - | - | - | - | - | - | - | - | + | - | - | - | NA      | NA | Phage protein                                              |
| ATV04562.1 | - | - | - | - | - | - | - | - | - | - | - | + | - | - | - | NA      | NA | Phage protein                                              |
| ATV04567.1 | - | - | - | - | - | - | - | - | - | - | - | + | - | - | - | NA      | NA | hypothetical protein SaO11_01741                           |
| ATV04572.1 | - | - | - | - | - | - | - | - | - | - | - | + | - | - | - | NA      | NA | hypothetical protein SaO11_01746                           |
| AFR72058.1 | + | - | - | - | - | - | - | - | - | - | - | - | - | - | + | NA      | NA | Hypothetical protein C248_0044                             |
| ATV04584.1 | - | - | - | - | - | - | - | - | - | - | - | + | + | - | - | NA      | NA | hypothetical protein SaO11_01758                           |
| AFR74376.1 | + | - | + | + | - | - | - | - | - | - | - | + | - | - | + | COG5504 | S  | hypothetical protein C248_2436                             |
| ATV04604.1 | - | - | - | - | - | - | - | - | - | - | - | + | - | - | - | COG0024 | J  | Putative metalloproteinase                                 |
| ATV04605.1 | - | - | - | - | - | - | - | - | - | - | - | + | - | - | - | COG4129 | S  | Putative membrane protein                                  |
| ATV04606.1 | - | - | - | - | - | - | - | - | - | - | - | + | - | - | - | NA      | NA | Hypothetical protein SaO11_01780                           |
| ATV04607.1 | - | - | - | - | - | - | - | - | - | - | - | + | - | - | - | COG3442 | R  | Hypothetical protein SaO11_01781                           |
| ATV04608.1 | - | - | - | - | - | - | - | - | - | - | - | + | - | - | - | COG0769 | M  | Mur ligase family protein                                  |
| ATV04609.1 | - | - | - | - | - | - | - | - | - | - | - | + | - | - | - | COG1528 | P  | Ferritin                                                   |
| ATV04610.1 | - | - | - | - | - | - | - | - | - | - | - | + | - | - | - | COG0847 | L  | Putative exonuclease                                       |
| ATV04611.1 | - | - | - | - | - | - | - | - | - | - | - | + | - | - | - | COG0389 | L  | ImpB/MucB/SamB family protein                              |
| ATV04612.1 | - | - | - | - | - | - | - | - | - | - | - | + | - | - | - | NA      | NA | Putative membrane protein                                  |
| ATV04613.1 | - | - | - | - | - | - | - | - | - | - | - | + | - | - | - | COG2265 | J  | Putative RNA methyltransferase                             |
| ATV04614.1 | - | - | - | - | - | - | - | - | - | - | - | + | - | - | - | COG1597 | IR | Hypothetical protein SaO11_01788                           |
| ATV04615.1 | - | - | - | - | - | - | - | - | - | - | - | + | - | - | - | NA      | NA | hypothetical protein SaO11_01789                           |
| ATV04616.1 | - | - | - | - | - | - | - | - | - | - | - | + | - | - | - | COG0064 | J  | Glutamyl-tRNA amidotransferase subunit B                   |
| ATV04617.1 | - | - | - | - | - | - | - | - | - | - | - | + | - | - | - | COG0154 | J  | Glutamyl-tRNA amidotransferase subunit A                   |
| ATV04618.1 | - | - | - | - | - | - | - | - | - | - | - | + | - | - | - | COG0721 | J  | Aspartyl/glutamyl-tRNA(Asn/Gln) amidotransferase subunit C |
| ATV04619.1 | - | - | - | - | - | - | - | - | - | - | - | + | - | - | - | COG0591 | E  | High affinity proline permease                             |
| ATV04620.1 | - | - | - | - | - | - | - | - | - | - | - | + | - | - | - | COG1733 | K  | Transcriptional regulator                                  |
| ATV04621.1 | - | - | - | - | - | - | - | - | - | - | - | + | - | - | - | COG2070 | R  | Nitronate monooxygenase                                    |
| ATV04622.1 | - | - | - | - | - | - | - | - | - | - | - | + | - | - | - | COG4851 | R  | Putative lipoprotein                                       |
| ATV04623.1 | - | - | - | - | - | - | - | - | - | - | - | + | - | - | - | COG0272 | L  | DNA ligase                                                 |
| ATV04624.1 | - | - | - | - | - | - | - | - | - | - | - | + | - | - | - | COG0210 | L  | ATP-dependent DNA helicase                                 |
| ATV04625.1 | - | - | - | - | - | - | - | - | - | - | - | + | - | - | - | COG1646 | I  | PerB family protein                                        |
| ATV04626.1 | - | - | - | - | - | - | - | - | - | - | - | + | - | - | - | COG4496 | S  | hypothetical protein SaO11_01800                           |
| ATV04627.1 | - | - | - | - | - | - | - | - | - | - | - | + | - | - | - | COG0015 | F  | Adenylosuccinate lyase                                     |
| ATV04628.1 | - | - | - | - | - | - | - | - | - | - | - | + | - | - | - | NA      | NA | Staphopain A                                               |
| ATV04629.1 | - | - | - | - | - | - | - | - | - | - | - | + | - | - | - | COG4843 | S  | hypothetical protein SaO11_01803                           |
| ATV04630.1 | - | - | - | - | - | - | - | - | - | - | - | + | - | - | - | COG0171 | H  | NAD(+) synthetase                                          |
| ATV04638.1 | - | - | - | - | - | - | - | - | - | - | - | + | - | - | - | NA      | NA | hypothetical protein SaO11_01812                           |
| ATV04652.1 | - | - | - | - | - | - | - | - | - | - | - | + | - | - | + | COG1725 | K  | GntR family transcriptional regulator                      |
| ATV04653.1 | - | - | - | - | - | - | - | - | - | - | - | + | - | - | + | NA      | NA | hypothetical protein SaO11_01827                           |
| ATV04654.1 | - | - | - | - | - | - | - | - | - | - | - | + | - | - | + | COG0436 | E  | Hypothetical protein SaO11_01828                           |
| ATV04655.1 | - | - | - | - | - | - | - | - | - | - | - | + | - | - | - | NA      | NA | Extracellular adherence protein Eap/Map                    |
| ATV04656.1 | - | - | - | - | - | - | - | - | - | - | - | + | - | - | - | NA      | NA | Extracellular adherence protein of broad specificity       |
| ATV04661.1 | - | - | - | - | - | - | - | - | - | - | - | + | - | - | - | NA      | NA | hypothetical protein SaO11_01835                           |
| ATV04666.1 | - | - | - | - | - | - | - | - | - | - | - | + | - | - | - | COG0234 | O  | 10 kDa chaperonin                                          |
| ATV04667.1 | - | - | - | - | - | - | - | - | - | - | - | + | - | - | - | COG1266 | O  | Putative membrane protein                                  |
| ATV04668.1 | - | - | - | - | - | - | - | - | - | - | - | + | - | - | - | NA      | NA | Serine-aspartate repeat family protein, SdrH               |



|            |   |   |   |   |   |   |   |   |   |   |   |   |   |   |   |         |    |                                              |
|------------|---|---|---|---|---|---|---|---|---|---|---|---|---|---|---|---------|----|----------------------------------------------|
| ATV04669.1 | - | - | - | - | - | - | - | - | - | - | - | - | - | - | - | COG3560 | R  | Hypothetical protein SaO11_01843             |
| ATV04670.1 | - | - | - | - | - | - | - | - | - | - | - | - | - | - | - | COG0388 | R  | Putative carbon-nitrogen hydrolase           |
| ATV04671.1 | - | - | - | - | - | - | - | - | - | - | - | - | - | - | - | NA      | NA | Delta-hemolysin                              |
| ATV04672.1 | - | - | - | - | - | - | - | - | - | - | - | - | - | - | - | NA      | NA | Accessory regulator protein B                |
| ATV04673.1 | - | - | - | - | - | - | - | - | - | - | - | - | - | - | - | NA      | NA | AgrD protein                                 |
| ATV04674.1 | - | - | - | - | - | - | - | - | - | - | - | - | - | - | - | NA      | NA | Autoinducer sensor AgrC                      |
| ATV04675.1 | - | - | - | - | - | - | - | - | - | - | - | - | - | - | - | COG3279 | KT | DNA-binding response regulator               |
| ATV04676.1 | - | - | - | - | - | - | - | - | - | - | - | - | - | - | - | COG0524 | G  | hypothetical protein SaO11_01850             |
| ATV04677.1 | - | - | - | - | - | - | - | - | - | - | - | - | - | - | - | COG1621 | G  | Invertase                                    |
| ATV04678.1 | - | - | - | - | - | - | - | - | - | - | - | - | - | - | - | COG1609 | K  | Sucrose operon repressor                     |
| AFR72059.1 | - | - | - | - | - | - | - | - | - | - | - | - | - | - | - | NA      | NA | hypothetical protein C248_0045               |
| ATV04679.1 | - | - | - | - | - | - | - | - | - | - | - | - | - | - | - | COG0004 | P  | Ammonium transporter family protein          |
| ATV04680.1 | - | - | - | - | - | - | - | - | - | - | - | - | - | - | - | COG0425 | O  | SirA family protein                          |
| ATV04681.1 | - | - | - | - | - | - | - | - | - | - | - | - | - | - | - | COG2391 | R  | Membrane protein                             |
| ATV04682.1 | - | - | - | - | - | - | - | - | - | - | - | - | - | - | - | COG2344 | K  | Hypothetical protein SaO11_01856             |
| ATV04683.1 | - | - | - | - | - | - | - | - | - | - | - | - | - | - | - | NA      | NA | ABC transporter ATP-binding protein          |
| ATV04684.1 | - | - | - | - | - | - | - | - | - | - | - | - | - | - | - | COG0249 | L  | Putative membrane protein                    |
| ATV04691.1 | - | - | - | - | - | - | - | - | - | - | - | - | - | - | - | NA      | NA | Acetolactate synthase 1 regulatory subunit   |
| ATV04704.1 | - | - | - | - | - | - | - | - | - | - | - | - | - | - | - | COG2337 | V  | Endoribonuclease MazF                        |
| ATV05031.1 | - | - | - | - | - | - | - | - | - | - | - | - | - | - | - | NA      | NA | Addiction module antitoxin                   |
| AUG72740.1 | - | - | - | - | - | - | - | - | - | - | - | - | - | - | - | NA      | NA | hypothetical protein SAO46_00265             |
| AUG72752.1 | - | - | - | - | - | - | - | - | - | - | - | - | - | - | - | NA      | NA | Nuclease                                     |
| AFR74393.1 | + | - | - | - | - | + | + | + | + | - | - | - | - | - | - | COG0803 | P  | putative solute binding lipoprotein          |
| AUG72754.1 | - | - | - | - | - | - | - | - | - | - | - | - | - | - | - | NA      | NA | hypothetical protein SAO46_00280             |
| AUG72755.1 | - | - | - | - | - | - | - | - | - | - | - | - | - | - | - | NA      | NA | PVL ORF-50-like family protein               |
| AFR74394.1 | + | - | - | - | - | + | + | + | + | - | - | - | - | - | - | COG1651 | O  | putative lipoprotein                         |
| AFR72060.1 | - | - | - | - | - | - | + | + | + | - | - | - | - | - | - | COG1961 | L  | Recombinase CcrC                             |
| AUG72767.1 | - | - | - | - | - | - | - | - | - | - | - | - | - | - | - | NA      | NA | hypothetical protein SAO46_00293             |
| AFR74395.1 | + | - | - | - | - | + | + | + | + | - | - | - | - | - | - | NA      | NA | putative lipoprotein                         |
| AFR74488.1 | - | - | - | - | - | - | - | - | - | - | - | - | - | - | - | COG1109 | G  | putative phosphomannomutase                  |
| AUG72787.1 | - | - | - | - | - | - | - | - | - | - | - | - | - | - | - | NA      | NA | Phage protein                                |
| AUG72790.1 | - | - | - | - | - | - | - | - | - | - | - | - | - | - | - | NA      | NA | Phage-like protein                           |
| AUG72791.1 | - | - | - | - | - | - | - | - | - | - | - | - | - | - | - | NA      | NA | XkdX family protein                          |
| AFR74489.1 | + | - | - | + | + | + | - | + | + | + | - | + | + | - | - | NA      | NA | putative exported protein                    |
| AFR74490.1 | - | - | - | + | + | - | - | - | + | + | - | - | + | + | - | NA      | NA | putative membrane protein                    |
| AFR74491.1 | + | - | - | + | + | + | + | + | + | + | - | + | + | + | - | COG1210 | M  | UTP--glucose-1-phosphate uridylyltransferase |
| AFR74492.1 | + | - | - | - | - | - | - | - | - | - | - | - | - | - | - | NA      | NA | Fibronectin-binding protein A                |
| AUG74185.1 | - | - | - | - | - | - | - | - | - | - | - | - | - | - | - | NA      | NA | Nitrogen regulation protein NIFR3            |
| AFR74494.1 | + | - | - | - | - | - | - | - | - | - | - | - | - | - | - | NA      | NA | Fibronectin binding protein precursor        |
| AFR74493.1 | - | - | - | - | - | - | - | - | - | - | - | - | - | - | - | NA      | NA | Hypothetical protein C248_2553               |
| AFR74495.1 | + | - | - | + | + | + | + | + | + | + | - | + | + | + | - | NA      | NA | Fibronectin-binding protein A                |
| AUG74243.1 | - | - | - | - | - | - | - | - | - | - | - | - | - | - | - | NA      | NA | Phage protein                                |
| AFR74496.1 | - | - | - | - | - | - | - | - | - | - | - | - | - | - | - | NA      | NA | Hypothetical protein C248_2556               |
| AFR72061.1 | + | - | - | - | - | - | - | - | - | - | - | - | - | - | - | NA      | NA | Hypothetical protein C248_0047               |
| AUG74246.1 | - | - | - | - | - | - | - | - | - | - | - | - | - | - | - | NA      | NA | hypothetical protein SAO46_01835             |
| AUG74249.1 | - | - | - | - | - | - | - | - | - | - | - | - | - | - | - | NA      | NA | hypothetical protein SAO46_01838             |
| AUG74250.1 | - | - | - | - | - | - | - | - | - | - | - | - | - | - | - | COG0305 | L  | DNA helicase, phage-associated               |
| AFR74497.1 | - | - | - | - | + | + | + | + | + | + | - | + | + | + | - | COG2610 | GR | putative gluconate permease                  |
| AUG74263.1 | - | - | - | - | - | - | - | - | - | - | - | - | - | - | - | NA      | NA | hypothetical protein SAO46_01852             |
| AFR74498.1 | + | - | - | + | + | + | + | + | + | + | - | + | + | + | - | COG1070 | G  | putative gluconokinase                       |
| AUG74264.1 | - | - | - | - | - | - | - | - | - | - | - | - | - | - | - | NA      | NA | hypothetical protein SAO46_01853             |

|                           |   |   |   |   |   |   |   |   |   |   |   |   |   |   |         |    |                                                         |
|---------------------------|---|---|---|---|---|---|---|---|---|---|---|---|---|---|---------|----|---------------------------------------------------------|
| AFR74499.1                | + | - | + | + | - | + | - | + | + | + | - | + | + | + | COG1802 | K  | gluconate operon transcriptional repressor              |
| AFR74500.1                | + | - | + | + | - | + | - | - | + | + | + | + | + | + | COG0789 | K  | MerR family regulatory protein                          |
| AFR74501.1                | - | - | + | + | - | + | - | - | + | + | - | + | + | + | COG2357 | FT | hypothetical protein C248_2561                          |
| AFR74502.1                | + | - | + | + | - | - | - | - | + | + | - | + | + | + | COG4876 | S  | hypothetical protein C248_2562                          |
| AFR74503.1                | + | - | + | + | - | - | - | - | + | + | - | + | + | + | COG1289 | S  | putative membrane protein                               |
| AFR72480.1                | + | + | + | - | + | - | - | + | + | + | - | - | - | + | COG2963 | X  | Transposase                                             |
| AFR72481.1                | + | + | + | - | + | - | - | + | + | - | - | - | - | - | NA      | NA | hypothetical protein C248_0468                          |
| AFR72482.1                | - | + | - | - | + | - | - | - | + | + | - | - | - | - | COG3759 | S  | Hypothetical Protein C248_0469                          |
| AFR72062.1                | + | - | - | - | - | - | - | - | - | - | - | - | - | + | NA      | NA | hypothetical protein C248_0048                          |
| CAI79713.1                | - | - | - | - | - | - | - | - | - | - | - | - | - | + | NA      | NA | conserved hypothetical protein                          |
| CAI79714.1                | - | - | - | - | - | - | - | - | - | - | - | - | - | + | NA      | NA | probable enterotoxin protein                            |
| AFR72483.1                | + | + | + | - | + | - | - | + | + | - | - | - | - | - | COG0702 | R  | hypothetical protein C248_0470                          |
| CAI79911.1                | - | - | - | - | - | - | - | - | - | - | - | - | - | + | COG4842 | S  | conserved hypothetical protein                          |
| CAI79912.1                | - | - | - | - | - | - | - | - | - | - | - | - | - | + | COG1511 | S  | probable membrane protein                               |
| CAI79914.1                | - | - | - | - | - | - | - | - | - | - | - | - | - | + | COG5417 | S  | conserved hypothetical protein                          |
| CAI79915.1                | - | - | - | - | - | - | - | - | - | - | - | - | - | + | COG4499 | S  | probable membrane protein                               |
| CAI79916.1                | - | - | - | - | - | - | - | - | - | - | - | - | - | + | COG1674 | D  | probable DNA segregation ATPase and related             |
| CAI79917.1                | - | - | - | - | - | - | - | - | - | - | - | - | - | + | NA      | NA | hypothetical protein SAB0229                            |
| CAI79918.1                | - | - | - | - | - | - | - | - | - | - | - | - | - | + | NA      | NA | hypothetical protein SAB0230                            |
| CAI79919.1                | - | - | - | - | - | - | - | - | - | - | - | - | - | + | NA      | NA | hypothetical protein SAB0231                            |
| CAI79920.1                | - | - | - | - | - | - | - | - | - | - | - | - | - | + | NA      | NA | hypothetical protein SAB0232                            |
| AFR72485.1                | + | + | + | - | + | - | - | + | + | - | - | - | - | - | NA      | NA | superantigen-like protein                               |
| CAI79922.1                | - | - | - | - | - | - | - | - | - | - | - | - | - | + | NA      | NA | conserved hypothetical protein                          |
| CAI79923.1                | - | - | - | - | - | - | - | - | - | - | - | - | - | + | NA      | NA | hypothetical protein SAB0235                            |
| CAI79924.1                | - | - | - | - | - | - | - | - | - | - | - | - | - | + | NA      | NA | truncated hypothetical protein                          |
| CAI79929.1                | - | - | - | - | - | - | - | - | - | - | - | - | - | + | NA      | NA | probable membrane protein                               |
| CAI79930.1                | - | - | - | - | - | - | - | - | - | - | - | - | - | + | COG2116 | P  | probable formate/nitrite transport protein              |
| CAI79931.1                | - | - | - | - | - | - | - | - | - | - | - | - | - | + | COG1114 | E  | probable branched-chain amino acid transport system     |
| AFR72486.1                | + | + | + | - | + | - | - | + | + | - | - | - | - | - | NA      | NA | exotoxin                                                |
| CAI80035.1                | - | - | - | - | - | - | - | - | - | - | - | - | - | + | NA      | NA | hypothetical bovine pathogenicity island protein        |
| CAI80036.1                | - | - | - | - | - | - | - | - | - | - | - | - | - | + | NA      | NA | bovine pathogenicity island protein Orf17               |
| AFR72487.1                | - | + | - | - | + | - | - | - | + | + | - | - | - | - | NA      | NA | exotoxin                                                |
| CAI80042.1                | - | - | - | - | - | - | - | - | - | - | - | - | - | + | NA      | NA | bovine pathogenicity island protein Orf10               |
| AFR72488.1                | + | + | + | - | + | - | - | + | + | - | - | - | - | - | NA      | NA | Exotoxin                                                |
| CAI80078.1                | - | - | - | - | - | - | - | - | - | - | - | - | - | + | NA      | NA | probable lipoprotein                                    |
| CAI80079.1                | - | - | - | - | - | - | - | - | - | - | - | - | - | + | NA      | NA | hypothetical protein SAB0391                            |
| AFR72490.1                | + | + | + | - | + | - | - | + | + | - | - | - | - | - | NA      | NA | superantigen-like protein                               |
| AFR72492.1                | + | + | + | - | + | - | - | + | + | - | - | - | - | - | NA      | NA | exotoxin 1                                              |
| AFR72493.1                | + | + | + | - | + | - | - | + | + | - | - | - | - | - | NA      | NA | exotoxin 5                                              |
| CAI80428.1                | - | - | - | - | - | - | - | - | - | - | - | - | - | - | NA      | NA | hypothetical protein SAB0740                            |
| AFR72494.1                | + | + | + | - | + | + | - | + | + | - | - | - | - | + | NA      | NA | exotoxin 4                                              |
| CAI80432.1                | - | - | - | - | - | - | - | - | - | - | - | - | - | - | NA      | NA | truncated clumping factor                               |
| AFR72495.1                | - | + | + | - | + | + | - | + | + | - | - | - | - | + | COG0286 | V  | putative type I restriction enzyme modification         |
| AFR72063.1                | + | - | - | - | - | - | - | - | - | - | - | - | - | + | NA      | NA | hypothetical protein C248_0049                          |
| CAI80711.1                | - | - | - | - | - | - | - | - | - | - | - | - | - | + | NA      | NA | probable membrane protein                               |
| AFR72496.1                | + | + | + | - | + | + | - | + | + | - | - | - | - | + | COG0732 | V  | Restriction modification system DNA specificity subunit |
| AFR72497.1                | + | + | + | - | + | - | - | + | + | - | + | - | - | - | NA      | NA | Exotoxin type C                                         |
| CAI80726.1                | - | - | - | - | - | - | - | - | - | - | - | - | - | + | NA      | NA | hypothetical protein SAB1038                            |
| CAI80978.1                | - | - | - | - | - | - | - | - | - | - | - | - | - | + | NA      | NA | truncated cell surface fibronectin-binding protein      |
| Saureus08S<br>00974_00415 | - | + | + | - | + | - | - | + | + | - | + | + | + | + | NA      | NA | hypothetical protein                                    |
| CAI80979.1                | - | - | - | - | - | - | - | - | - | - | - | - | - | + | NA      | NA | truncated cell surface fibronectin-binding protein      |

|            |   |   |   |   |   |   |   |   |   |   |   |   |   |   |   |   |         |     |                                                    |
|------------|---|---|---|---|---|---|---|---|---|---|---|---|---|---|---|---|---------|-----|----------------------------------------------------|
| CAI80980.1 | - | - | - | - | - | - | - | - | - | - | - | - | - | - | + | - | NA      | NA  | truncated cell surface fibronectin-binding protein |
| CAI80981.1 | - | - | - | - | - | - | - | - | - | - | - | - | - | - | + | - | NA      | NA  | truncated cell surface fibronectin-binding protein |
| CAI80982.1 | - | - | - | - | - | - | - | - | - | - | - | - | - | - | + | - | NA      | NA  | truncated cell surface fibronectin-binding protein |
| CAI80984.1 | - | - | - | - | - | - | - | - | - | - | - | - | - | - | + | - | NA      | NA  | hypothetical protein SABI295                       |
| CAI80985.1 | - | - | - | - | - | - | - | - | - | - | - | - | - | - | + | - | COG0604 | CR  | probable alcohol dehydrogenase                     |
| CAI80986.1 | - | - | - | - | - | - | - | - | - | - | - | - | - | - | + | - | COG1846 | K   | conserved hypothetical protein                     |
| CAI80989.1 | - | - | - | - | - | - | - | - | - | - | - | - | - | - | + | - | NA      | NA  | truncated cell surface fibronectin-binding protein |
| AFR72500.1 | - | + | + | - | - | + | - | - | - | - | - | - | - | + | + | - | NA      | NA  | putative exported protein                          |
| AFR72501.1 | + | + | + | - | + | - | - | - | + | - | - | - | - | - | + | - | NA      | NA  | putative lipoprotein                               |
| CAI81349.1 | - | - | - | - | - | - | - | - | - | - | - | - | - | - | + | - | NA      | NA  | conserved hypothetical protein                     |
| CAI81350.1 | - | - | - | - | - | - | - | - | - | - | - | - | - | - | + | - | NA      | NA  | conserved hypothetical protein                     |
| AFR72502.1 | + | + | + | - | - | - | - | - | - | - | - | - | - | - | - | - | NA      | NA  | putative lipoprotein                               |
| CAI81359.1 | - | - | - | - | - | - | - | - | - | - | - | - | - | - | + | - | COG3591 | E   | serine proteinase                                  |
| CAI81363.1 | - | - | - | - | - | - | - | - | - | - | - | - | - | - | + | - | NA      | NA  | hypothetical protein SABI674c, partial             |
| AFR72503.1 | + | + | + | + | + | - | - | - | + | + | - | - | - | - | + | + | NA      | NA  | putative lipoprotein                               |
| AFR72504.1 | - | + | + | - | - | + | + | - | - | + | + | - | - | - | + | - | NA      | NA  | putative lipoprotein                               |
| CAI81377.1 | - | - | - | - | - | - | - | - | - | - | - | - | - | - | + | - | NA      | NA  | hypothetical protein SABI688                       |
| CAI81378.1 | - | - | - | - | - | - | - | - | - | - | - | - | - | - | + | - | NA      | NA  | hypothetical protein SABI689c                      |
| CAI81381.1 | - | - | - | - | - | - | - | - | - | - | - | - | - | - | + | - | NA      | NA  | hypothetical protein SABI692                       |
| CAI81384.1 | - | - | - | - | - | - | - | - | - | - | - | - | - | - | + | - | NA      | NA  | hypothetical protein SABI695                       |
| CAI81385.1 | - | - | - | - | - | - | - | - | - | - | - | - | - | - | + | - | NA      | NA  | enterotoxin G                                      |
| AFR72505.1 | + | + | + | - | - | - | - | - | - | - | - | - | - | - | - | - | NA      | NA  | putative lipoprotein                               |
| CAI81387.1 | - | - | - | - | - | - | - | - | - | - | - | - | - | - | + | - | NA      | NA  | enterotoxin type C variant                         |
| CAI81391.1 | - | - | - | - | - | - | - | - | - | - | - | - | - | - | + | - | NA      | NA  | hypothetical protein SABI702c                      |
| CAI81394.1 | - | - | - | - | - | - | - | - | - | - | - | - | - | - | + | - | NA      | NA  | phage-related tail fiber                           |
| AFR72506.1 | + | + | + | - | - | - | - | - | - | - | - | - | - | - | - | - | NA      | NA  | putative lipoprotein                               |
| AFR72064.1 | - | - | - | - | - | - | - | - | - | - | - | - | - | - | - | - | NA      | NA  | hypothetical protein C248_0050                     |
| AFR72507.1 | + | + | - | - | - | - | - | - | - | - | - | - | - | - | - | - | NA      | NA  | putative lipoprotein                               |
| CAI81413.1 | - | - | - | - | - | - | - | - | - | - | - | - | - | - | + | - | NA      | NA  | hypothetical phage-related protein                 |
| CAI81416.1 | - | - | - | - | - | - | - | - | - | - | - | - | - | - | + | - | COG3728 | X   | hypothetical mobile-element-associated protein     |
| AFR72508.1 | + | + | - | - | - | - | - | - | - | - | - | - | - | - | - | - | NA      | NA  | putative lipoprotein                               |
| CAI81420.1 | - | - | - | - | - | - | - | - | - | - | - | - | - | - | + | - | NA      | NA  | hypothetical phage-related protein                 |
| AFR72509.1 | + | + | + | - | + | - | - | - | + | - | - | - | - | - | + | - | NA      | NA  | putative lipoprotein                               |
| AFR72510.1 | + | + | + | - | - | - | - | - | + | - | - | - | - | - | + | - | NA      | NA  | hypothetical protein C248_0497                     |
| CAI81439.1 | - | - | - | - | - | - | - | - | - | - | - | - | - | - | + | - | NA      | NA  | hypothetical protein SABI750c                      |
| CAI81441.1 | - | - | - | - | - | - | - | - | - | - | - | - | - | - | + | - | NA      | NA  | hypothetical protein SABI752c                      |
| CAI81444.1 | - | - | - | - | - | - | - | - | - | - | - | - | - | - | + | - | NA      | NA  | phage anti-repressor protein                       |
| CAI81445.1 | - | - | - | - | - | - | - | - | - | - | - | - | - | - | + | - | NA      | NA  | hypothetical phage-related protein                 |
| CAI81447.1 | - | - | - | - | - | - | - | - | - | - | - | - | - | - | + | - | NA      | NA  | hypothetical protein SABI758                       |
| AFR72511.1 | - | + | + | - | - | + | - | - | - | - | - | - | - | - | + | - | NA      | NA  | hypothetical protein C248_0498                     |
| CAI81448.1 | - | - | - | - | - | - | - | - | - | - | - | - | - | - | + | - | NA      | NA  | hypothetical protein SABI759                       |
| CAI81450.1 | - | - | - | - | - | - | - | - | - | - | - | - | - | - | + | - | NA      | NA  | hypothetical protein SABI761c                      |
| CAI81452.1 | - | - | - | - | - | - | - | - | - | - | - | - | - | - | + | - | COG1232 | H   | protoporphyrinogen oxidase                         |
| CAI81453.1 | - | - | - | - | - | - | - | - | - | - | - | - | - | - | + | - | COG0276 | H   | ferrochelatase                                     |
| CAI81454.1 | - | - | - | - | - | - | - | - | - | - | - | - | - | - | + | - | COG0407 | H   | uroporphyrinogen decarboxylase                     |
| CAI81567.1 | - | - | - | - | - | - | - | - | - | - | - | - | - | - | + | - | NA      | NA  | truncated hypothetical protein                     |
| CAI81568.1 | - | - | - | - | - | - | - | - | - | - | - | - | - | - | + | - | COG0697 | GER | hypothetical protein SABI879c                      |
| AFR72512.1 | - | - | - | - | - | + | - | - | - | - | - | - | - | - | + | - | NA      | NA  | hypothetical protein C248_0499                     |
| CAI81570.1 | - | - | - | - | - | - | - | - | - | - | - | - | - | - | + | - | NA      | NA  | hypothetical protein SABI881c                      |
| CAI81577.1 | - | - | - | - | - | - | - | - | - | - | - | - | - | - | + | - | NA      | NA  | hypothetical protein SABI888c                      |
| CAI81579.1 | - | - | - | - | - | - | - | - | - | - | - | - | - | - | + | - | NA      | NA  | hypothetical protein SABI890                       |

|                           |   |   |   |   |   |   |   |   |   |   |   |   |   |         |    |                                                                               |
|---------------------------|---|---|---|---|---|---|---|---|---|---|---|---|---|---------|----|-------------------------------------------------------------------------------|
| AFR72513.1                | + | + | - | - | + | - | - | + | - | - | + | - | - | NA      | NA | putative membrane protein                                                     |
| CAI81582.1                | - | - | - | - | - | - | - | - | - | - | - | + | - | NA      | NA | hypothetical protein SAB1893c                                                 |
| CAI81589.1                | - | - | - | - | - | - | - | - | - | - | - | + | - | NA      | NA | hypothetical protein SAB1900c                                                 |
| CAI81590.1                | - | - | - | - | - | - | - | - | - | - | - | + | - | NA      | NA | hypothetical protein SAB1901c                                                 |
| Saureus08S<br>00974_00487 | - | + | + | - | - | - | - | - | - | + | - | - | - | COG0037 | J  | tRNA(Ile)-lysidine synthase                                                   |
| AFR72575.1                | + | + | - | + | - | - | - | - | + | + | - | - | - | COG0634 | F  | putative hypoxanthine phosphoribosyltransferase                               |
| AFR72576.1                | - | + | - | + | - | - | - | - | + | + | - | - | + | COG0465 | O  | putative cell division protein                                                |
| AFR72065.1                | + | - | - | - | - | - | - | - | - | - | - | - | - | NA      | NA | type I restriction-modification system restriction subunit                    |
| CAI81734.1                | - | - | - | - | - | - | - | - | - | - | - | + | - | COG3464 | X  | transposase                                                                   |
| CAI81735.1                | - | - | - | - | - | - | - | - | - | - | - | + | - | COG3464 | X  | probable transposase                                                          |
| CAI81740.1                | - | - | - | - | - | - | - | - | - | - | - | + | - | COG1272 | U  | probable hemolysin                                                            |
| AFR72577.1                | + | + | + | + | - | - | - | + | + | + | - | - | + | COG1281 | O  | putative chaperonin                                                           |
| AFR72578.1                | + | + | + | + | - | - | + | + | + | + | - | - | + | COG0031 | E  | Cysteine synthase                                                             |
| CAI82058.1                | - | - | - | - | - | - | - | - | - | - | - | + | - | NA      | NA | hypothetical protein SAB2370c                                                 |
| AFR72579.1                | - | + | - | + | - | - | - | - | + | + | - | - | + | COG0294 | H  | dihydropteroate synthase                                                      |
| CAI82064.1                | - | - | - | - | - | - | - | - | - | - | - | + | - | NA      | NA | hypothetical protein SAB2376c                                                 |
| AFR72580.1                | + | + | + | + | - | - | + | + | + | + | - | - | + | COG1539 | H  | dihydroneopterin aldolase                                                     |
| CAI82075.1                | - | - | - | - | - | - | - | - | - | - | - | + | - | NA      | NA | hypothetical protein SAB2387                                                  |
| AFR72581.1                | + | + | + | + | - | - | + | + | + | + | - | - | + | COG0801 | H  | putative 2-amino-4-hydroxy-6-hydroxymethylidihydropteridine pyrophosphokinase |
| YP_005732836              | - | - | - | - | - | - | - | - | - | - | - | - | + | NA      | NA | conserved hypothetical protein                                                |
| YP_00573283               | - | - | - | - | - | - | - | - | - | - | - | - | + | NA      | NA | conserved hypothetical protein                                                |
| AFR72583.1                | + | + | + | + | - | - | + | + | + | + | - | - | + | COG1190 | J  | lysyl-tRNA synthetase                                                         |
| YP_00573283               | - | - | - | - | - | - | - | - | - | - | - | - | + | NA      | NA | conserved hypothetical protein                                                |
| YP_005732840              | - | - | - | - | - | - | - | - | - | - | - | - | + | NA      | NA | conserved hypothetical protein                                                |
| YP_005732842              | - | - | - | - | - | - | - | - | - | - | - | - | + | NA      | NA | conserved hypothetical protein                                                |
| YP_005732844              | - | - | - | - | - | - | - | - | - | - | - | - | + | NA      | NA | conserved hypothetical protein                                                |
| YP_005732846              | - | - | - | - | - | - | - | - | - | - | - | - | + | NA      | NA | conserved hypothetical protein                                                |
| YP_005732847              | - | - | - | - | - | - | - | - | - | - | - | - | + | NA      | NA | conserved hypothetical protein                                                |
| AFR72584.1                | + | + | + | + | - | - | + | + | + | + | - | - | + | COG1167 | KE | GntR family regulatory protein                                                |
| YP_005732849              | - | - | - | - | - | - | - | - | - | - | - | - | + | NA      | NA | probable HMG-CoA synthase                                                     |
| Saureus08S<br>00974_00545 | - | + | + | + | - | + | - | + | + | + | + | - | + | COG0590 | J  | tRNA-specific adenosine deaminase                                             |
| YP_005732865              | - | - | - | - | - | - | - | - | - | - | - | - | + | COG0550 | L  | DNA topoisomerase III                                                         |
| YP_005732866              | - | - | - | - | - | - | - | - | - | - | - | - | + | NA      | NA | conserved hypothetical protein                                                |
| YP_005732867              | - | - | - | - | - | - | - | - | - | - | - | - | + | NA      | NA | cassette chromosome recombinase A                                             |
| YP_005732868              | - | - | - | - | - | - | - | - | - | - | - | - | + | NA      | NA | conserved hypothetical protein                                                |
| AFR72991.1                | - | - | - | - | - | - | - | - | - | - | - | - | - | COG0561 | HR | putative haloacid dehalogenase-like hydrolase                                 |
| YP_005732869              | - | - | - | - | - | - | - | - | - | - | - | - | + | COG2217 | P  | cadmium-translocating P-type ATPase                                           |
| YP_005732870              | - | - | - | - | - | - | - | - | - | - | - | - | + | COG0607 | P  | metallo-beta-lactamase family protein                                         |
| YP_005732871              | - | - | - | - | - | - | - | - | - | - | - | - | + | COG0491 | R  | metallo-beta-lactamase family protein                                         |
| YP_005732875              | - | - | - | - | - | - | - | - | - | - | - | - | + | NA      | NA | copper P-type ATPase AtkB                                                     |
| YP_005732876              | - | - | - | - | - | - | - | - | - | - | - | - | + | NA      | NA | lipoprotein, putative                                                         |
| Saureus08S<br>00974_00547 | - | + | + | + | - | + | - | + | + | + | + | - | + | COG0431 | C  | FMN-dependent NADPH-azoreductase                                              |
| AFR72066.1                | - | - | - | - | - | - | - | - | - | - | - | - | - | COG1518 | V  | CasI family protein                                                           |
| AFR72030.1                | + | - | + | - | - | + | - | + | - | - | - | + | + | COG3887 | T  | putative membrane protein                                                     |
| YP_005733149              | - | - | - | - | - | - | - | - | - | - | - | - | + | COG1396 | K  | repressor                                                                     |
| YP_005733150              | - | - | - | - | - | - | - | - | - | - | - | - | + | NA      | NA | conserved hypothetical protein                                                |
| YP_005733151              | - | - | - | - | - | - | - | - | - | - | - | - | + | NA      | NA | phage regulatory protein, Rha family                                          |
| YP_005733153              | - | - | - | - | - | - | - | - | - | - | - | - | + | NA      | NA | conserved hypothetical protein                                                |

|                           |   |   |   |   |   |   |   |   |   |   |   |   |   |   |   |   |         |    |                                                             |
|---------------------------|---|---|---|---|---|---|---|---|---|---|---|---|---|---|---|---|---------|----|-------------------------------------------------------------|
| YP_005733155              | - | - | - | - | - | - | - | - | - | - | - | - | - | - | - | + | NA      | NA | conserved hypothetical protein                              |
| Saureus08S<br>00974_00548 | - | + | + | + | - | + | - | - | - | - | - | - | - | - | - | + | NA      | NA | Serine-aspartate repeat-containing protein C precursor      |
| Saureus08S<br>00974_00549 | - | + | + | + | - | + | - | - | - | - | - | - | - | - | - | + | NA      | NA | Serine-aspartate repeat-containing protein D precursor      |
| YP_005733169              | - | - | - | - | - | - | - | - | - | - | - | - | - | - | - | + | NA      | NA | conserved hypothetical protein                              |
| Saureus08S<br>00974_00550 | - | + | + | + | - | + | - | - | - | - | - | - | - | - | - | + | NA      | NA | Serine-aspartate repeat-containing protein E precursor      |
| Saureus08S<br>00974_00551 | - | + | + | + | - | + | - | - | - | - | - | - | - | - | - | + | COG0438 | M  | putative poly(glycerol-phosphate) alpha-glucosyltransferase |
| YP_005733195              | - | - | - | - | - | - | - | - | - | - | - | - | - | - | - | + | NA      | NA | prophage L54a, tail tape measure protein,                   |
| Saureus08S<br>00974_00552 | - | + | - | - | - | - | - | - | - | - | - | - | - | - | - | + | COG2826 | X  | Integrase core domain protein                               |
| Saureus08S<br>00974_00553 | - | + | + | + | - | + | - | - | - | - | - | - | - | - | - | + | COG0438 | M  | putative poly(glycerol-phosphate) alpha-glucosyltransferase |
| Saureus08S<br>00974_00554 | - | + | - | - | - | - | - | - | - | - | + | - | - | - | - | + | COG1469 | H  | GTP cyclohydrolase FofE2                                    |
| Saureus08S<br>00974_00555 | - | + | - | - | - | - | - | - | - | - | + | - | - | - | - | + | COG2120 | G  | Mycothiol S-conjugate amidase                               |
| Saureus08S<br>00974_00556 | - | + | - | - | - | - | - | - | - | - | - | + | - | - | - | + | NA      | NA | hypothetical protein                                        |
| YP_005733447              | - | - | - | - | - | - | - | - | - | - | - | - | - | - | - | + | COG0546 | C  | indigoidine synthesis protein                               |
| Saureus08S<br>00974_00557 | - | + | - | - | - | - | - | - | - | - | - | - | - | - | - | + | COG0363 | G  | Glucosamine-6-phosphate deaminase                           |
| AFR72067.1                | + | - | - | - | - | - | - | - | - | - | - | - | - | - | - | - | NA      | NA | CRISPR-associated protein Cas2                              |
| YP_005733664              | - | - | - | - | - | - | - | - | - | - | - | - | - | - | - | + | NA      | NA | clumping factor A                                           |
| YP_005733665              | - | - | - | - | - | - | - | - | - | - | - | - | - | - | - | + | NA      | NA | hypothetical protein SAPIG0865                              |
| YP_005733666              | - | - | - | - | - | - | - | - | - | - | - | - | - | - | - | + | NA      | NA | lpxtg-motif cell wall anchor domain                         |
| Saureus08S<br>00974_00558 | - | + | - | - | - | - | - | - | - | - | - | - | - | - | - | + | COG0269 | G  | 3-hexulose-6-phosphate synthase                             |
| Saureus08S<br>00974_00559 | - | + | - | - | - | - | - | - | - | - | - | - | - | - | - | + | COG0794 | GM | 3-hexulose-6-phosphate isomerase                            |
| YP_005733749              | - | - | - | - | - | - | - | - | - | - | - | - | - | - | - | + | COG1074 | L  | recombination helicase AddA                                 |
| AFR72867.1                | - | + | + | + | - | - | - | - | - | - | - | - | - | - | - | + | NA      | NA | hypothetical protein C248_0873                              |
| AFR72868.1                | + | + | + | + | - | - | + | - | + | + | - | - | + | + | + | + | NA      | NA | putative lipoprotein                                        |
| YP_005733767              | - | - | - | - | - | - | - | - | - | - | - | - | - | - | - | + | NA      | NA | conjugative transposon protein                              |
| YP_005733949              | - | - | - | - | - | - | - | - | - | - | - | - | - | - | - | + | NA      | NA | hypothetical protein SAPIG1152                              |
| AFR72871.1                | + | + | + | + | - | - | + | - | + | + | - | - | + | + | + | + | NA      | NA | putative membrane protein                                   |
| AFR72872.1                | - | - | - | - | - | - | - | - | - | - | - | - | - | - | - | + | COG3153 | R  | putative acetyltransferase                                  |
| AFR72873.1                | + | + | + | + | - | - | - | - | - | - | + | - | - | - | - | - | NA      | NA | clumping factor                                             |
| YP_005734281              | - | - | - | - | - | - | - | - | - | - | - | - | - | - | - | + | NA      | NA | conserved hypothetical protein                              |
| AFR72475.1                | - | - | - | + | - | + | - | - | + | + | - | - | + | + | + | + | NA      | NA | secreted von Willebrand factor-binding protein precursor    |
| YP_005734284              | - | - | - | - | - | - | - | - | - | - | - | - | - | - | - | + | NA      | NA | conserved hypothetical protein                              |
| YP_005734285              | - | - | - | - | - | - | - | - | - | - | - | - | - | - | - | + | NA      | NA | hypothetical protein SAPIG1489                              |
| YP_005734286              | - | - | - | - | - | - | - | - | - | - | - | - | - | - | - | + | NA      | NA | conserved hypothetical protein                              |
| AFR72876.1                | + | + | + | + | - | - | + | - | + | + | - | - | + | + | + | + | NA      | NA | putative exported protein                                   |
| YP_005734292              | - | - | - | - | - | - | - | - | - | - | - | - | - | - | - | + | NA      | NA | conserved hypothetical protein                              |
| YP_005734293              | - | - | - | - | - | - | - | - | - | - | - | - | - | - | - | + | NA      | NA | hypothetical phage-related protein                          |
| AFR72877.1                | + | + | + | + | - | - | + | - | + | + | - | - | + | + | + | + | NA      | NA | hypothetical protein C248_0883                              |
| AFR72068.1                | - | - | - | - | - | - | - | - | - | - | - | - | - | - | - | + | COG1353 | V  | CRISPR-associated Csm1 family protein                       |
| AFR72878.1                | + | + | + | + | - | - | + | - | + | + | - | - | + | + | + | + | COG1525 | L  | thermonuclease precursor                                    |
| AFR72880.1                | - | - | - | - | - | - | - | - | - | - | - | - | - | - | - | + | COG1278 | K  | putative cold shock protein                                 |

|                           |   |   |   |   |   |   |   |   |   |   |   |   |   |         |    |                                                                 |
|---------------------------|---|---|---|---|---|---|---|---|---|---|---|---|---|---------|----|-----------------------------------------------------------------|
| AFR72881.1                | + | + | + | + | - | - | + | - | + | + | - | - | - | NA      | NA | hypothetical protein C248_0887                                  |
| AFR72882.1                | + | + | + | + | - | - | + | - | + | + | - | - | + | NA      | NA | hypothetical protein C248_0888                                  |
| YP_005734599              | - | - | - | - | - | - | - | - | - | - | - | - | + | COG0115 | EH | D-amino acid aminotransferase                                   |
| AFR72883.1                | + | + | + | + | - | - | + | - | + | + | - | - | + | NA      | NA | putative exported protein                                       |
| AFR72884.1                | + | + | + | + | - | - | + | - | + | + | - | - | + | NA      | NA | Hypothetical protein C248_0890                                  |
| Saureus08S<br>00974_00791 | - | + | + | + | - | - | + | - | + | + | - | - | - | NA      | NA | hypothetical protein                                            |
| YP_005734680              | - | - | - | - | - | - | - | - | - | - | - | - | + | NA      | NA | conserved hypothetical protein                                  |
| YP_005734789              | - | - | - | - | - | - | - | - | - | - | - | - | + | NA      | NA | conserved hypothetical protein                                  |
| YP_005734790              | - | - | - | - | - | - | - | - | - | - | - | - | + | COG2826 | X  | transposase InsI for insertion sequence element                 |
| AFR72885.1                | + | + | + | + | - | - | + | - | + | + | - | - | + | NA      | NA | hypothetical protein C248_0891                                  |
| YP_005734791              | - | - | - | - | - | - | - | - | - | - | - | - | + | NA      | NA | N-region of transposase of                                      |
| YP_005734793              | - | - | - | - | - | - | - | - | - | - | - | - | + | NA      | NA | conserved hypothetical protein                                  |
| YP_005734794              | - | - | - | - | - | - | - | - | - | - | - | - | + | COG3942 | M  | transfer complex protein TraG                                   |
| YP_005734795              | - | - | - | - | - | - | - | - | - | - | - | - | + | NA      | NA | membrane protein, putative                                      |
| YP_005734796              | - | - | - | - | - | - | - | - | - | - | - | - | + | NA      | NA | ftsk/spoiii family protein                                      |
| YP_005734797              | - | - | - | - | - | - | - | - | - | - | - | - | + | NA      | NA | ftsk/spoiii family protein                                      |
| YP_005734798              | - | - | - | - | - | - | - | - | - | - | - | - | + | NA      | NA | conserved hypothetical protein                                  |
| YP_005734799              | - | - | - | - | - | - | - | - | - | - | - | - | + | NA      | NA | conserved hypothetical protein                                  |
| YP_005734800              | - | - | - | - | - | - | - | - | - | - | - | - | + | NA      | NA | conserved hypothetical protein                                  |
| AFR72886.1                | + | + | + | + | - | - | + | - | + | + | - | - | + | NA      | NA | Hypothetical protein C248_0892                                  |
| YP_005734801              | - | - | - | - | - | - | - | - | - | - | - | - | + | NA      | NA | conserved hypothetical protein                                  |
| YP_005734802              | - | - | - | - | - | - | - | - | - | - | - | - | + | NA      | NA | replication initiation factor family protein                    |
| YP_005734803              | - | - | - | - | - | - | - | - | - | - | - | - | + | NA      | NA | replication initiation factor family protein                    |
| YP_005734804              | - | - | - | - | - | - | - | - | - | - | - | - | + | NA      | NA | conserved hypothetical protein                                  |
| YP_005734805              | - | - | - | - | - | - | - | - | - | - | - | - | + | NA      | NA | conserved hypothetical protein                                  |
| YP_005734806              | - | - | - | - | - | - | - | - | - | - | - | - | + | NA      | NA | conserved hypothetical protein                                  |
| YP_005734807              | - | - | - | - | - | - | - | - | - | - | - | - | + | NA      | NA | conserved hypothetical protein                                  |
| Saureus08S<br>00974_00794 | - | + | + | + | - | - | + | - | + | + | - | - | + | COG0406 | G  | Putative phosphoserine phosphatase 2                            |
| AFR72069.1                | + | - | - | - | - | - | - | - | - | - | - | - | - | NA      | NA | CRISPR-associated Csm2 protein                                  |
| AFR72888.1                | + | + | + | + | - | - | + | - | + | + | - | - | + | COG1279 | E  | putative LysE type translocator protein                         |
| YP_005734970              | - | - | - | - | - | - | - | - | - | - | - | - | + | NA      | NA | transcriptional antiterminator, BglG family/DNA-binding protein |
| AFR72889.1                | + | + | + | + | - | - | + | - | + | + | - | - | + | COG1670 | JO | hypothetical protein C248_0895                                  |
| AFR72890.1                | + | + | + | + | - | - | + | - | + | + | - | - | + | COG1764 | V  | OsmC-like protein                                               |
| AFR72891.1                | + | + | + | + | - | - | + | - | + | + | - | - | + | COG0710 | E  | putative type I 3-dehydroquinase                                |
| AFR72966.1                | + | + | + | + | - | - | + | - | + | + | - | - | + | NA      | NA | Putative transposon integrase                                   |
| AFR72968.1                | + | + | + | + | - | - | + | - | + | + | - | - | + | NA      | NA | Hypothetical protein C248_0974                                  |
| AFR72970.1                | + | + | + | + | - | - | + | - | + | + | - | - | + | NA      | NA | hypothetical protein C248_0976                                  |
| AFR72971.1                | + | + | + | + | - | - | + | - | + | + | - | - | + | NA      | NA | hypothetical protein C248_0977                                  |
| AFR72972.1                | + | + | + | + | - | - | + | - | + | + | - | - | + | COG1396 | K  | transcriptional regulator, putative                             |
| AFR72973.1                | + | + | + | + | - | - | + | - | + | + | - | - | + | COG0480 | J  | tetracycline resistance protein                                 |
| AFR72070.1                | + | - | - | - | - | - | - | - | - | - | - | - | - | NA      | NA | CRISPR-associated RAMP protein, Csm3 family                     |
| AFR72974.1                | + | + | + | + | - | - | + | - | + | + | - | - | + | NA      | NA | Hypothetical protein C248_0980                                  |
| AFR72975.1                | + | + | + | + | - | - | + | - | + | + | - | - | + | COG0791 | M  | hypothetical protein C248_0981                                  |
| AFR72976.1                | + | + | + | + | - | - | + | - | + | + | - | - | + | NA      | NA | Hypothetical protein C248_0982                                  |
| AFR72977.1                | + | + | + | + | - | - | + | - | + | + | - | - | + | COG0433 | L  | hypothetical protein C248_0983                                  |
| AFR72979.1                | + | + | + | + | - | - | + | - | + | + | - | - | + | NA      | NA | Antirestriction protein                                         |
| AFR72980.1                | + | + | + | + | - | - | + | - | + | + | - | - | + | NA      | NA | hypothetical protein C248_0986                                  |
| AFR72981.1                | + | + | + | + | - | - | + | - | + | + | - | - | + | NA      | NA | Transcriptional regulator                                       |
| AFR72983.1                | + | + | + | + | - | - | + | - | + | + | - | - | + | COG1674 | D  | hypothetical protein C248_0989                                  |
| AFR72984.1                | + | + | + | + | - | - | + | - | + | + | - | - | + | NA      | NA | hypothetical protein C248_0990                                  |

|                           |   |   |   |   |   |   |   |   |   |   |   |   |   |   |         |    |                                             |
|---------------------------|---|---|---|---|---|---|---|---|---|---|---|---|---|---|---------|----|---------------------------------------------|
| AFR72985.1                | + | + | - | + | - | - | - | - | - | + | - | - | - | - | NA      | NA | hypothetical protein C248_0991              |
| AFR72071.1                | + | - | - | - | - | - | - | - | - | - | - | - | - | - | NA      | NA | CRISPR-associated RAMP protein              |
| AFR72987.1                | - | - | + | - | - | - | - | - | - | + | - | - | - | + | COG3666 | X  | putative transposase                        |
| AFR72989.1                | + | - | - | - | - | - | - | - | - | + | - | - | - | + | NA      | NA | Putative transposase                        |
| AFR72990.1                | + | + | - | + | - | - | - | - | - | + | - | - | - | + | COG0446 | I  | coenzyme A disulfide reductase              |
| AFR72992.1                | + | + | - | + | - | - | - | - | - | + | - | - | - | - | COG2151 | O  | hypothetical protein C248_0998              |
| AFR72994.1                | + | + | - | + | - | - | - | - | - | + | - | - | - | - | NA      | NA | putative membrane protein                   |
| AFR72995.1                | - | + | + | + | - | - | - | - | - | + | - | - | - | - | COG0542 | O  | putative ATPase subunit of an ATP-dependent |
| AFR73458.1                | + | + | + | + | + | + | + | + | + | - | + | + | + | + | NA      | NA | hypothetical protein C248_1468              |
| AFR73459.1                | + | + | + | + | + | + | + | + | + | - | + | + | + | + | COG1413 | R  | Conserved virulence factor C                |
| AFR73460.1                | - | + | + | + | + | + | + | + | + | - | + | + | + | + | NA      | NA | hypothetical protein C248_1470              |
| AFR72072.1                | + | - | - | - | - | - | - | - | - | - | - | - | - | - | NA      | NA | CRISPR-associated RAMP protein, Csm5 family |
| AFR73462.1                | + | + | + | + | + | + | + | + | + | - | + | + | + | + | COG1738 | S  | putative membrane protein                   |
| AFR73463.1                | + | + | + | + | + | + | + | + | + | - | + | + | + | + | COG0328 | L  | hypothetical protein C248_1473              |
| AFR73464.1                | + | + | + | + | - | - | - | - | + | - | - | - | - | + | NA      | NA | Extracellular matrix-binding protein ebbB   |
| Saureus08S<br>00974_01342 | - | + | + | + | + | + | + | + | + | + | - | + | + | + | NA      | NA | Quinolone resistance protein NorB           |
| Saureus08S<br>00974_01343 | - | + | + | + | + | + | + | + | + | + | - | + | + | + | COG0531 | E  | Serine/threonine exchanger SteT             |
| Saureus08S<br>00974_01344 | - | + | + | + | + | + | + | + | + | + | - | + | + | + | COG1171 | E  | L-threonine dehydratase catabolic TdcB      |
| Saureus08S<br>00974_01345 | - | + | + | - | + | + | + | + | + | - | + | - | - | + | COG0686 | E  | Alanine dehydrogenase 1                     |
| Saureus08S<br>00974_01346 | - | + | - | - | - | - | - | - | + | - | - | - | - | - | COG0258 | L  | 5'-3' exonuclease                           |
| Saureus08S<br>00974_01397 | - | + | - | + | - | + | + | + | + | + | - | - | + | + | NA      | NA | Bacteriophage holin                         |
| AFR72382.1                | - | - | + | + | + | + | + | + | + | + | + | + | + | + | NA      | NA | putative phage protein                      |
| AFR72073.1                | + | - | - | - | - | - | - | - | - | - | - | - | - | - | NA      | NA | CRISPR-associated protein, Csm6 family      |
| AFR72381.1                | + | + | - | + | + | + | + | + | + | + | - | - | - | + | NA      | NA | putative phage protein                      |
| AFR72380.1                | + | + | - | + | + | + | + | + | + | + | - | - | - | + | NA      | NA | putative phage protein                      |
| AFR72379.1                | + | + | - | + | + | + | + | + | + | + | - | + | - | + | NA      | NA | putative phage protein                      |
| AFR72378.1                | - | + | + | + | + | + | + | + | + | + | + | + | + | + | NA      | NA | putative phage protein                      |
| AFR72377.1                | + | + | - | - | + | + | + | + | + | + | - | - | - | + | NA      | NA | putative phage protein                      |
| AFR72376.1                | + | + | - | - | + | + | + | + | + | + | + | + | - | + | NA      | NA | putative phage protein                      |
| AFR72375.1                | - | + | - | - | + | + | + | + | + | + | - | - | - | + | NA      | NA | putative phage protein                      |
| AFR72374.1                | + | + | - | - | + | - | + | - | - | + | + | + | - | + | NA      | NA | putative phage protein                      |
| AFR72373.1                | + | + | - | - | + | + | + | + | + | + | + | + | - | + | NA      | NA | hypothetical protein C248_0360              |
| AFR72372.1                | + | + | - | - | + | + | + | + | + | + | + | + | - | + | NA      | NA | hypothetical protein C248_0359              |
| AFR72074.1                | + | - | - | - | - | - | - | - | - | - | - | - | - | - | NA      | NA | CRISPR-associated protein C                 |
| AFR72371.1                | - | + | - | - | + | + | + | + | + | + | + | + | - | + | COG5492 | R  | major tail protein                          |
| AFR73789.1                | + | + | + | - | - | + | + | + | + | + | - | - | + | - | NA      | NA | putative exported protein                   |
| AFR73790.1                | + | + | + | + | + | + | + | + | + | + | - | + | + | + | COG1187 | J  | RNA pseudouridine synthase                  |
| AFR73791.1                | - | - | + | + | + | + | + | + | + | + | + | + | + | + | COG2244 | M  | Polysaccharide biosynthesis protein         |
| AFR73792.1                | + | + | + | + | + | + | + | + | + | + | + | + | + | + | COG2081 | R  | putative exported protein                   |
| AFR73793.1                | + | + | + | + | - | - | - | + | + | + | + | + | - | + | NA      | NA | putative surface anchored protein           |
| AFR73794.1                | + | + | + | + | + | + | + | + | + | + | + | + | + | + | COG0607 | P  | hypothetical protein C248_1804              |
| AFR73795.1                | + | + | + | + | + | + | + | + | + | + | + | + | + | + | COG0495 | J  | leucyl-tRNA synthetase                      |
| AFR73796.1                | - | + | + | + | + | + | + | + | + | + | + | + | + | + | COG2814 | G  | putative membrane protein                   |
| AFR73797.1                | + | + | + | + | + | + | + | + | + | + | + | + | + | + | COG1242 | R  | hypothetical protein C248_1807              |
| AFR72075.1                | + | - | + | + | - | - | - | - | - | - | - | - | - | - | NA      | NA | hypothetical protein C248_0061              |
| AFR73798.1                | - | - | + | + | + | + | + | + | + | + | - | + | + | + | COG0500 | QR | hypothetical protein C248_1808              |

|                           |   |   |   |   |   |   |   |   |   |   |   |   |   |   |         |         |                       |                                                        |
|---------------------------|---|---|---|---|---|---|---|---|---|---|---|---|---|---|---------|---------|-----------------------|--------------------------------------------------------|
| AFR73799.1                | + | + | + | + | + | + | + | + | + | + | + | + | + | + | +       | COG1846 | K                     | Toxin repressor                                        |
| AFR73800.1                | + | + | + | + | + | + | + | + | + | - | - | + | + | + | +       | COG2267 | I                     | hypothetical protein C248_1810                         |
| AFR73802.1                | - | - | - | - | - | + | - | - | - | - | + | - | + | + | COG0506 | E       | proline dehydrogenase |                                                        |
| Saureus08S<br>00974_01807 | + | - | - | + | - | - | - | - | - | - | + | - | + | - | -       | COG0219 | J                     | tRNA (cytidine(34)-2'-O)-methyltransferase             |
| Saureus08S<br>00974_01808 | - | + | - | + | - | - | + | - | - | - | + | - | + | - | -       | COG1600 | J                     | Epoxyqueuosine reductase                               |
| Saureus08S<br>00974_01809 | - | + | - | + | - | - | + | - | - | + | + | + | + | + | +       | COG1126 | E                     | L-cystine import ATP-binding protein TcyC              |
| Saureus08S<br>00974_01810 | - | + | - | + | - | - | + | - | - | - | + | - | + | - | -       | COG0834 | ET                    | Arginine transport system permease protein ArtQ        |
| Saureus08S<br>00974_01811 | - | + | - | + | - | - | + | - | - | - | + | - | + | - | -       | COG3641 | S                     | Phosphotransferase system, EIIC                        |
| Saureus08S<br>00974_01841 | - | + | - | + | - | - | + | - | - | + | + | - | + | - | -       | COG0735 | P                     | Peroxide-responsive repressor PerR                     |
| AFR72076.1                | + | - | - | - | - | - | - | - | - | - | - | - | - | - | -       | NA      | NA                    | Putative transposase                                   |
| AFR72031.1                | - | - | - | - | - | + | - | - | - | - | - | - | - | + | +       | COG0359 | J                     | 50S ribosomal protein L9                               |
| Saureus08S00974_01        | - | + | - | + | - | - | + | - | - | + | + | - | + | - | -       | COG0111 | HR                    | Glyoxylate/hydroxyppyruvate reductase B                |
| Saureus08S<br>00974_01843 | - | + | - | + | - | - | + | - | - | + | + | - | + | - | -       | COG1225 | O                     | Putative peroxiredoxin bep                             |
| Saureus08S<br>00974_01844 | - | + | - | + | - | - | + | - | - | + | + | - | + | - | -       | COG0001 | H                     | Glutamate-1-semialdehyde 2,1-aminomutase 2             |
| Saureus08S<br>00974_01845 | - | + | - | + | - | - | + | - | - | + | + | - | + | - | -       | COG4129 | S                     | Fusaric acid resistance protein family protein         |
| Saureus08S<br>00974_01846 | - | + | - | + | - | - | + | - | - | + | + | - | + | - | -       | COG1132 | V                     | Putative multidrug export ATP-binding/permease protein |
| Saureus08S<br>00974_01847 | - | + | - | + | - | - | + | - | - | + | + | - | + | - | -       | COG3557 | S                     | hypothetical protein                                   |
| Saureus08S<br>00974_01848 | - | + | - | + | - | - | + | - | - | + | + | - | + | - | -       | COG1194 | L                     | putative A/G-specific adenine glycosylase YfbQ         |
| Saureus08S<br>00974_01849 | - | + | - | + | - | - | + | - | - | + | + | - | + | - | -       | COG1988 | R                     | hypothetical protein                                   |
| Saureus08S<br>00974_02069 | - | + | - | - | - | + | - | - | - | - | - | - | - | - | -       | COG3666 | X                     | Transposase DDE domain protein                         |
| Saureus08S<br>00974_02070 | - | + | - | - | - | - | - | - | - | - | + | - | - | - | -       | COG0449 | M                     | Glutamine--fructose-6-phosphate aminotransferase       |
| AFR72077.1                | + | - | - | - | - | - | - | - | - | - | - | - | - | - | -       | COG4584 | X                     | Hypothetical protein C248_0063                         |
| Saureus08S<br>00974_02071 | - | + | + | - | - | - | + | - | - | - | + | + | - | + | -       | COG2213 | G                     | PTS system mannitol-specific EIICB component           |
| AFR74134.1                | + | + | + | - | - | - | + | - | - | - | + | + | + | + | -       | COG1762 | GT                    | putative transcriptional antiterminator                |
| AFR74135.1                | - | + | + | + | - | - | + | - | - | - | + | + | - | + | +       | COG4668 | G                     | PTS system, mannitol-specific IIA component            |
| AFR74136.1                | + | + | + | + | - | - | + | + | - | - | + | + | + | + | +       | COG0246 | G                     | putative mannitol-1-phosphate 5-dehydrogenase          |
| AFR74137.1                | + | + | + | + | + | + | + | + | + | + | + | + | + | + | +       | NA      | NA                    | fntB protein                                           |
| AFR74138.1                | + | + | + | + | - | - | + | + | - | - | + | + | + | + | +       | COG1109 | G                     | putative phosphoglucosamine mutase                     |
| AFR74139.1                | + | + | + | + | - | - | + | + | - | - | + | + | + | + | +       | COG4856 | S                     | putative exported protein                              |
| AFR74140.1                | + | + | + | + | - | - | + | + | - | - | + | + | + | + | +       | COG1624 | T                     | putative membrane protein                              |
| AFR74141.1                | + | + | + | + | - | - | + | + | - | - | + | + | + | + | +       | COG0010 | E                     | arginase                                               |
| AFR74142.1                | + | + | + | + | - | - | + | + | - | - | + | + | + | + | +       | NA      | NA                    | hypothetical protein C248_2202                         |
| AFR72078.1                | - | - | - | - | - | - | - | - | - | - | - | - | - | - | -       | NA      | NA                    | putative transposase                                   |
| AFR74143.1                | + | + | + | - | - | - | - | - | - | - | + | - | - | + | +       | COG2814 | G                     | Putative multidrug resistance transporter              |
| Saureus08S<br>00974_02088 | - | + | - | - | - | - | - | - | - | - | - | - | - | + | -       | NA      | NA                    | Multidrug resistance efflux pump SepA                  |
| Saureus08S                | - | - | - | - | - | - | - | - | - | - | - | - | - | - | -       | COG0477 | GFBR                  | Multidrug resistance protein 3                         |



| 00974_02089 |   |   |   |   |   |   |   |   |   |   |   |   |   |   |         | COG077 | CLASS                                         | putative membrane protein |
|-------------|---|---|---|---|---|---|---|---|---|---|---|---|---|---|---------|--------|-----------------------------------------------|---------------------------|
| AFR74377.1  | + | + | - | - | + | + | + | - | - | + | - | - | + | + | COG0789 | K      | HTH-type transcriptional activator tipA       |                           |
| AFR74378.1  | - | - | - | - | + | + | - | - | + | + | + | - | + | + | COG2197 | TK     | putative response regulator                   |                           |
| AFR74379.1  | + | + | - | - | + | + | + | + | - | + | + | + | + | + | COG4585 | T      | putative histidine kinase                     |                           |
| AFR74380.1  | + | + | - | - | + | + | - | + | - | + | + | + | + | + | COG2203 | T      | hypothetical protein C248_2440                |                           |
| AFR74381.1  | + | + | - | - | + | + | + | + | - | + | + | + | + | + | COG2181 | CP     | putative nitrate reductase gamma chain        |                           |
| AFR74382.1  | + | + | - | - | + | + | + | + | - | + | + | + | + | + | COG2180 | CPO    | respiratory nitrate reductase delta chain     |                           |
| AFR74383.1  | - | + | - | - | + | + | - | - | - | + | + | - | + | + | COG1140 | CP     | nitrate reductase beta chain                  |                           |
| AFR72079.1  | + | - | - | + | - | - | - | - | - | - | - | - | - | + | COG1484 | L      | IstB-like ATP binding protein                 |                           |
| AFR74384.1  | + | + | - | - | + | + | + | + | - | + | + | + | + | + | COG5013 | CP     | nitrate reductase alpha chain                 |                           |
| AFR74385.1  | - | + | - | - | + | + | - | - | - | + | + | + | + | + | COG0007 | H      | Tetrapyrrole methyltransferase                |                           |
| AFR74386.1  | + | + | - | - | + | + | + | + | - | + | + | + | + | + | COG2146 | PQ     | assimilatory nitrite reductase small subunit  |                           |
| AFR74387.1  | + | + | - | - | + | + | - | + | - | + | + | + | + | + | COG1251 | C      | nitrite reductase large subunit               |                           |
| AFR74388.1  | + | + | - | - | + | + | + | + | - | + | + | + | + | + | COG2138 | H      | Regulatory protein                            |                           |
| AFR74389.1  | + | + | - | - | + | + | + | + | - | + | + | + | + | + | NA      | NA     | acetyltransferase GNAT family protein         |                           |
| AFR74390.1  | - | + | - | - | + | + | - | - | - | + | + | + | + | + | COG2116 | P      | putative nitrite transporter                  |                           |
| AFR74391.1  | + | + | - | - | + | + | + | + | - | + | + | + | + | + | NA      | NA     | putative membrane protein                     |                           |
| AFR74392.1  | + | + | - | - | + | + | + | + | - | - | + | + | + | + | COG3832 | S      | hypothetical protein C248_2452                |                           |
| AFR72080.1  | - | - | - | + | - | - | - | - | - | - | - | - | - | - | NA      | NA     | hypothetical protein C248_0066                |                           |
| AFH68375.1  | - | - | + | - | - | - | - | - | - | - | - | - | - | - | NA      | NA     | hypothetical protein ST398NM01_2800           |                           |
| AFH68381.1  | - | - | - | - | - | - | - | - | - | - | - | - | - | - | NA      | NA     | hypothetical protein ST398NM01_2801           |                           |
| AFR72081.1  | + | - | - | - | - | - | - | - | - | - | - | - | - | - | NA      | NA     | Transposase                                   |                           |
| AFH68713.1  | - | - | + | - | - | - | - | - | - | - | - | - | - | - | NA      | NA     | Hypothetical protein ST398NM01_2819           |                           |
| AFR72336.1  | - | - | - | - | - | - | - | - | - | - | - | - | - | - | NA      | NA     | putative phage protein                        |                           |
| AFH68721.1  | - | - | + | - | - | - | - | - | - | - | - | - | - | - | NA      | NA     | hypothetical protein ST398NM01_2821           |                           |
| AFR72337.1  | + | - | - | - | - | - | - | - | - | - | - | - | - | - | NA      | NA     | hypothetical protein C248_0324                |                           |
| AFR72338.1  | - | - | - | - | + | + | - | - | - | - | - | - | - | + | NA      | NA     | putative DNA-binding protein                  |                           |
| AFR72339.1  | + | - | + | - | - | + | + | - | + | + | + | + | - | - | NA      | NA     | putative phage protein                        |                           |
| AFH68744.1  | - | - | - | - | - | - | - | - | - | - | - | - | - | - | NA      | NA     | hypothetical protein ST398NM01_0516           |                           |
| AFH68746.1  | - | - | + | - | - | - | - | - | - | - | - | - | - | - | NA      | NA     | hypothetical protein ST398NM01_2822           |                           |
| AFH68747.1  | - | - | + | - | - | - | - | - | - | - | - | - | - | - | NA      | NA     | hypothetical protein ST398NM01_2823           |                           |
| AFR72340.1  | - | - | - | - | - | - | - | - | - | - | - | - | - | - | NA      | NA     | putative phage protein                        |                           |
| AFR72032.1  | + | - | + | - | - | + | - | + | - | - | - | - | + | + | COG0305 | L      | DnaB-like helicase                            |                           |
| AFH68763.1  | - | - | + | - | - | + | - | - | - | - | + | - | + | - | NA      | NA     | Acetyltransferase                             |                           |
| AFH68764.1  | - | - | - | - | - | - | - | - | - | - | + | - | + | - | COG5438 | S      | putative membrane spanning protein            |                           |
| AFH68765.1  | - | - | + | - | - | - | + | - | - | - | + | + | + | - | COG5438 | S      | putative membrane spanning protein            |                           |
| AFH68766.1  | - | - | + | - | - | - | - | - | - | - | + | + | + | - | COG0583 | K      | Glc                                           |                           |
| AFH68767.1  | - | - | + | - | - | - | + | - | - | - | + | + | - | - | COG0070 | E      | Glutamate synthase [NADPH] large chain        |                           |
| AFR72341.1  | + | - | - | - | - | - | - | - | - | - | - | + | - | + | NA      | NA     | putative phage protein                        |                           |
| AFH68768.1  | - | - | - | - | - | - | - | - | - | - | - | + | - | - | COG0493 | ER     | Glutamate synthase [NADPH] small chain        |                           |
| AFH68769.1  | - | - | - | + | - | - | + | - | - | - | - | + | + | - | COG1264 | G      | PTS system, trehalose-specific IIBC component |                           |
| AFH68770.1  | - | - | - | + | - | - | + | - | - | - | - | + | + | - | COG0366 | G      | Trehalose-6-phosphate hydrolase               |                           |
| AFH68771.1  | - | - | + | - | - | - | - | - | - | - | - | - | + | - | COG2188 | K      | Trehalose operon transcriptional repressor    |                           |
| AFH68772.1  | - | - | - | + | - | - | + | - | - | - | - | + | + | - | COG3153 | R      | Acetyltransferase                             |                           |
| AFH68773.1  | - | - | - | + | - | - | + | - | - | - | - | + | + | - | COG2812 | L      | DNA polymerase III subunit gamma/tau          |                           |
| AFH68774.1  | - | - | + | + | - | - | + | + | - | - | - | + | + | - | COG0718 | R      | putative transcriptional regulatory protein   |                           |
| AFH68775.1  | - | - | + | + | - | - | + | + | - | - | - | + | - | - | COG0353 | L      | RecR                                          |                           |
| AFH68776.1  | - | - | - | + | - | - | - | - | - | - | - | - | - | - | NA      | NA     | Arginine decarboxylase                        |                           |
| AFH68777.1  | - | - | + | + | - | - | + | + | - | - | - | - | - | - | COG0125 | F      | Thymidylate kinase                            |                           |
| AFR72342.1  | + | - | - | - | - | - | - | - | - | - | - | - | - | + | NA      | NA     | putative phage protein                        |                           |
| AFH68778.1  | - | - | - | + | - | - | - | - | - | - | - | - | - | - | COG3870 | S      | putative cytosolic protein                    |                           |

|            |   |   |   |   |   |   |   |   |   |   |   |   |   |         |    |                                            |
|------------|---|---|---|---|---|---|---|---|---|---|---|---|---|---------|----|--------------------------------------------|
| AFH68779.1 | - | - | + | + | - | - | - | + | - | - | - | - | - | NA      | NA | DNA polymerase III, delta' subunit         |
| AFH68780.1 | - | - | + | + | - | - | - | + | - | - | - | - | - | COG1774 | T  | Phosphorelay inhibitor                     |
| AFH68781.1 | - | - | + | + | - | - | - | - | - | - | - | - | - | COG4467 | L  | Initiation-control protein                 |
| AFR72343.1 | + | - | - | - | - | - | - | - | - | - | + | - | + | NA      | NA | putative phage protein                     |
| AFH68815.1 | - | - | - | + | - | - | - | + | - | - | - | - | + | COG0214 | H  | Pyridoxine biosynthesis protein            |
| AFH68816.1 | - | - | - | + | - | - | + | - | - | + | - | - | - | COG0311 | H  | Pyridoxine biosynthesis amidotransferase   |
| AFH68817.1 | - | - | + | - | - | - | - | - | - | - | - | - | - | NA      | NA | hypothetical protein ST398NM01_2825        |
| AFH68818.1 | - | - | - | - | - | - | - | - | - | - | - | - | - | COG1972 | F  | hypothetical protein ST398NM01_0596        |
| AFH68819.1 | - | - | + | - | - | - | - | - | - | - | - | - | - | COG4463 | K  | CtsR                                       |
| AFH68820.1 | - | - | + | - | - | - | - | - | - | - | - | - | - | COG3880 | O  | ClpC ATPase                                |
| AFH68850.1 | - | - | + | - | - | - | - | + | - | + | - | - | - | COG1069 | G  | L-ribulokinase                             |
| AFH68851.1 | - | - | - | + | - | - | + | - | + | + | - | - | - | COG0451 | M  | L-threonine 3-dhydrogenase                 |
| AFR72344.1 | + | - | - | - | - | - | - | - | - | - | - | - | + | NA      | NA | putative DNA polymerase                    |
| AFH68852.1 | - | - | + | - | - | + | - | + | - | + | - | - | + | COG0115 | EH | Branched-chain amino acid aminotransferase |
| AFH68853.1 | - | - | + | - | - | + | - | + | - | + | - | - | + | COG0546 | C  | Putative phosphatase                       |
| AFH68854.1 | - | - | - | + | - | - | + | - | + | - | - | - | + | COG1428 | F  | Deoxyadenosine kinase                      |
| AFH68855.1 | - | - | + | + | - | + | - | + | - | + | - | - | + | COG1428 | F  | Deoxyguanosine kinase                      |
| AFR72345.1 | + | - | - | - | - | - | - | - | - | - | - | - | - | NA      | NA | Hypothetical protein C248_0332             |
| AFH69094.1 | - | - | - | - | - | - | - | - | - | - | - | - | - | NA      | NA | hypothetical protein ST398NM01_2845        |
| AFR72346.1 | + | - | - | + | + | + | + | + | - | + | + | + | - | NA      | NA | Hypothetical Protein C248_0333             |
| AFR72347.1 | + | - | - | + | + | + | + | + | - | + | - | - | + | NA      | NA | PVL ORF-50-like family                     |
| AFR72348.1 | + | - | + | + | - | + | + | + | + | + | + | + | + | NA      | NA | putative phage protein                     |
| AFH69378.1 | - | - | + | - | - | - | - | - | - | - | - | - | - | NA      | NA | hypothetical protein ST398NM01_2861        |
| AFH69379.1 | - | - | - | - | + | - | - | - | - | - | - | + | - | NA      | NA | hypothetical protein ST398NM01_2862        |
| AFR72349.1 | + | - | + | + | + | + | + | + | - | + | - | - | + | NA      | NA | PVL orf 52-like protein                    |
| AFR72350.1 | + | - | - | - | - | - | - | - | - | - | - | - | - | NA      | NA | Putative dUTP pyrophosphatase              |
| AFR72033.1 | - | - | - | - | - | + | - | - | - | - | + | + | + | COG0104 | F  | putative adenylosuccinate synthetase       |
| AFR72351.1 | + | - | - | - | - | - | + | - | - | - | - | - | - | NA      | NA | concerned hypothetical protein             |
| AFR72352.1 | + | - | - | + | - | - | - | - | + | - | - | - | - | NA      | NA | hypothetical protein C248_0339             |
| AFR72353.1 | + | - | + | + | + | - | - | - | - | - | - | - | + | NA      | NA | putative phage protein                     |
| AFR72354.1 | + | - | + | + | - | + | + | + | - | + | + | + | + | NA      | NA | Transcriptional activator RinB             |
| AFH70181.1 | - | - | - | - | - | - | - | - | - | - | - | - | - | NA      | NA | hypothetical protein ST398NM01_1156        |
| AFH70182.1 | - | - | + | - | - | - | - | - | - | - | - | - | - | NA      | NA | hypothetical protein ST398NM01_2911        |
| AFH70183.1 | - | - | + | - | - | - | - | - | - | - | - | - | - | NA      | NA | hypothetical protein ST398NM01_2912        |
| AFH70185.1 | - | - | - | - | - | - | - | - | - | - | - | - | - | NA      | NA | Chemotaxis-inhibiting protein              |
| AFH70188.1 | - | - | + | - | - | - | - | - | - | - | - | - | - | NA      | NA | hypothetical protein ST398NM01_2914        |
| AFR72355.1 | + | - | - | - | + | + | - | - | - | + | + | + | + | NA      | NA | Hypothetical protein C248_0342             |
| AFH70190.1 | - | - | + | - | - | + | - | - | - | + | + | - | - | NA      | NA | hypothetical protein ST398NM01_2915        |
| AFH70191.1 | - | - | + | - | - | + | - | - | - | + | - | - | - | NA      | NA | hypothetical protein ST398NM01_2916        |
| AFH70192.1 | - | - | - | - | + | + | - | - | - | + | + | - | - | NA      | NA | Phage-related protein                      |
| AFH70193.1 | - | - | + | - | + | + | - | - | - | + | + | - | - | NA      | NA | Phage-related protein                      |
| AFH70194.1 | - | - | + | - | - | + | - | - | - | + | + | - | - | COG0739 | M  | hypothetical protein ST398NM01_2919        |
| AFH70195.1 | - | - | - | - | - | + | - | - | - | - | - | - | - | NA      | NA | hypothetical protein ST398NM01_2920        |
| AFH70196.1 | - | - | + | - | - | + | - | - | - | + | - | - | - | NA      | NA | hypothetical protein ST398NM01_2921        |
| AFH70197.1 | - | - | + | - | - | + | - | - | - | - | - | - | - | NA      | NA | Phage protein                              |
| AFH70198.1 | - | - | + | - | - | + | - | - | - | + | - | - | - | NA      | NA | prophage pi2 protein 39                    |
| AFH70199.1 | - | - | + | - | - | + | - | - | - | + | - | - | - | NA      | NA | hypothetical protein ST398NM01_2924        |
| AFR72356.1 | - | - | - | - | - | + | - | - | - | - | - | - | + | NA      | NA | E family protein                           |
| AFH70201.1 | - | - | + | - | - | + | - | - | - | + | - | - | - | NA      | NA | Phage protein                              |
| AFH70202.1 | - | - | + | - | - | + | - | - | - | + | - | - | - | NA      | NA | Gp6 protein                                |
| AFH70203.1 | - | - | - | - | - | + | - | - | - | + | - | - | + | NA      | NA | Phage protein                              |

|            |   |   |   |   |   |   |   |   |   |   |   |   |   |   |         |    |                                                             |
|------------|---|---|---|---|---|---|---|---|---|---|---|---|---|---|---------|----|-------------------------------------------------------------|
| AFH70204.1 | - | - | + | - | - | + | - | - | - | + | - | - | - | - | NA      | NA | Major capsid protein                                        |
| AFH70205.1 | - | - | + | - | - | + | - | - | - | + | - | - | - | - | COG0740 | O  | CipP                                                        |
| AFH70206.1 | - | - | + | - | - | + | - | - | - | + | - | - | - | - | NA      | NA | Portal protein                                              |
| AFH70208.1 | - | - | + | - | - | + | - | - | - | + | - | - | - | - | NA      | NA | Phage-related protein                                       |
| AFH70209.1 | - | - | + | - | - | + | - | - | - | + | - | - | - | - | NA      | NA | hypothetical protein ST398NM01_2932                         |
| AFR72357.1 | + | - | - | - | - | + | - | - | - | - | - | + | - | + | NA      | NA | hypothetical protein C248_0344                              |
| AFH70210.1 | - | - | + | - | - | + | - | - | - | + | - | - | - | - | COG1403 | V  | HNH endonuclease family protein                             |
| AFH70211.1 | - | - | - | - | + | + | - | - | - | + | - | - | - | - | NA      | NA | Phage transcriptional activator                             |
| AFH70215.1 | - | - | + | + | + | + | + | + | - | + | + | + | + | + | NA      | NA | hypothetical protein ST398NM01_0362                         |
| AFH70216.1 | - | - | + | - | + | + | - | + | - | - | - | - | - | - | NA      | NA | Deoxyuridine 5'-triphosphate nucleotidohydrolase            |
| AFH70217.1 | - | - | + | - | - | - | - | - | + | - | - | - | - | - | NA      | NA | hypothetical protein ST398NM01_2936                         |
| AFH70218.1 | - | - | + | + | + | + | + | + | - | - | + | + | + | + | NA      | NA | Phage protein                                               |
| AFH70219.1 | - | - | + | - | - | - | - | - | - | - | - | - | - | - | NA      | NA | Hypothetical protein ST398NM01_2937                         |
| AFR72358.1 | + | - | - | - | - | + | - | - | - | - | - | + | - | + | COG0553 | KL | putative phage protein                                      |
| AFH70222.1 | - | - | + | + | + | + | - | - | - | - | - | - | - | - | NA      | NA | Phage protein                                               |
| AFH70223.1 | - | - | + | - | - | - | - | - | - | - | - | - | - | - | NA      | NA | hypothetical protein ST398NM01_2940                         |
| AFH70224.1 | - | - | + | - | - | - | - | - | + | - | - | - | - | - | NA      | NA | Phage protein                                               |
| AFH70225.1 | - | - | + | - | + | + | + | + | + | - | + | + | + | - | COG0629 | L  | Single-strand DNA binding protein                           |
| AFH70226.1 | - | - | + | - | - | - | - | - | - | - | - | - | - | - | NA      | NA | Metal-dependent hydrolase                                   |
| AFH70227.1 | - | - | + | - | - | - | - | - | - | - | - | - | - | - | NA      | NA | Rect                                                        |
| AFH70228.1 | - | - | + | - | - | - | - | - | - | - | - | - | - | - | NA      | NA | Hypothetical protein ST398NM01_2945                         |
| AFH70229.1 | - | - | + | - | - | - | - | - | + | - | - | - | - | - | NA      | NA | hypothetical protein ST398NM01_2946                         |
| AFR72359.1 | + | - | - | - | - | + | + | + | - | - | + | + | + | + | NA      | NA | phage regulatory protein                                    |
| AFH70230.1 | - | - | + | - | - | + | + | + | + | + | + | + | + | - | NA      | NA | putative cytosolic protein                                  |
| AFH70231.1 | - | - | + | - | - | + | + | + | - | + | - | - | + | - | NA      | NA | putative cytosolic protein                                  |
| AFH70232.1 | - | - | + | - | - | - | - | - | - | - | - | - | - | - | NA      | NA | hypothetical protein ST398NM01_2949                         |
| AFH70234.1 | - | - | + | - | - | - | - | - | - | + | - | - | - | - | COG4707 | X  | Hypothetical protein ST398NM01_2951                         |
| AFH70235.1 | - | - | + | - | - | - | - | - | - | + | - | - | - | - | NA      | NA | hypothetical protein ST398NM01_2952                         |
| AFH70236.1 | - | - | + | - | - | + | - | - | - | + | - | + | - | - | NA      | NA | Phage protein                                               |
| AFH70237.1 | - | - | + | - | + | + | + | + | + | + | + | + | + | - | COG3645 | X  | Phage antirepressor protein                                 |
| AFH70238.1 | - | - | + | - | - | - | - | - | - | - | - | - | - | - | NA      | NA | Phage protein                                               |
| AFH70239.1 | - | - | + | - | - | - | - | - | - | - | - | - | - | - | NA      | NA | hypothetical protein ST398NM01_2956                         |
| AFR72360.1 | + | - | - | - | + | + | - | - | - | - | + | + | - | + | COG1403 | V  | HNH endonuclease family protein                             |
| AFR72034.1 | + | - | - | - | - | - | - | - | - | - | - | - | - | - | NA      | NA | Hypothetical Protein C248_0020                              |
| AFH70240.1 | - | - | + | - | - | - | - | - | - | - | - | - | - | - | NA      | NA | Phage transcriptional regulator, Cro/C1 family              |
| AFH70241.1 | - | - | + | - | + | + | - | - | - | + | - | + | + | - | COG1396 | K  | Phage transcriptional repressor                             |
| AFH70242.1 | - | - | + | - | - | - | - | - | - | - | - | - | - | - | NA      | NA | DNA polymerase III alpha subunit                            |
| AFH70243.1 | - | - | + | - | - | - | - | - | - | - | - | - | - | - | NA      | NA | hypothetical protein ST398NM01_2959                         |
| AFH70244.1 | - | - | + | - | - | - | - | - | - | + | + | - | - | - | NA      | NA | putative cytosolic protein                                  |
| AFH70247.1 | - | - | + | - | - | - | - | - | + | - | + | - | - | - | NA      | NA | Sphingomyelin phosphodiesterase                             |
| AFR72361.1 | + | - | - | - | + | + | + | + | - | + | + | + | - | + | NA      | NA | terminase small subunit                                     |
| AFH70405.1 | - | - | + | - | - | - | - | - | - | - | - | - | - | - | NA      | NA | Mannitol-1-phosphate 5-dehydrogenase                        |
| AFH70412.1 | - | - | + | - | - | - | - | - | - | - | - | - | - | - | NA      | NA | hypothetical protein ST398NM01_2970                         |
| AFH70413.1 | - | - | + | - | - | - | - | - | - | - | - | - | - | - | COG0489 | D  | ApoC                                                        |
| AFR72362.1 | + | - | + | - | + | + | - | - | - | + | - | + | - | + | COG4626 | X  | terminase large subunit                                     |
| AFH70762.1 | - | - | + | + | - | - | - | - | - | + | - | - | + | - | NA      | NA | Type II restriction-modification system methylation subunit |
| AFH70769.1 | - | - | + | + | - | - | - | - | - | + | - | - | + | - | NA      | NA | Fibronectin-binding protein                                 |
| AFR72363.1 | - | - | + | - | + | + | - | - | - | + | + | - | - | - | NA      | NA | portal protein                                              |
| APE87178.1 | - | - | - | + | - | - | - | - | - | - | - | - | - | + | NA      | NA | hypothetical protein AS852_00350                            |
| APE87179.1 | - | - | - | + | - | - | - | - | - | - | - | - | - | - | NA      | NA | hypothetical protein AS852_00355                            |
| APE87181.1 | - | - | - | + | - | - | - | - | - | - | - | - | - | - | NA      | NA | hypothetical protein AS852_00365                            |

|            |   |   |   |   |   |   |   |   |   |   |   |   |   |   |         |    |                                                                      |
|------------|---|---|---|---|---|---|---|---|---|---|---|---|---|---|---------|----|----------------------------------------------------------------------|
| AFR72364.1 | + | - | - | - | + | + | + | - | - | + | + | + | - | + | COG0740 | O  | phage protease                                                       |
| APE87185.1 | - | - | - | + | - | - | - | - | - | - | - | - | - | - | NA      | NA | transposase                                                          |
| APE87186.1 | - | - | - | + | - | - | - | - | - | - | - | - | - | - | NA      | NA | hypothetical protein AS852_00395                                     |
| APE87187.1 | - | - | - | + | - | - | - | - | - | - | - | - | - | - | NA      | NA | hydratase                                                            |
| APE87188.1 | - | - | - | + | - | - | - | - | - | - | - | - | - | - | NA      | NA | hypothetical protein AS852_00405                                     |
| AFR72365.1 | + | - | - | - | + | + | + | - | - | + | + | + | - | + | NA      | NA | putative phage capsid protein                                        |
| APE87533.1 | - | - | - | + | - | - | + | - | - | - | - | - | - | - | NA      | NA | hypothetical protein AS852_02250                                     |
| APE89767.1 | - | - | - | + | - | - | - | - | - | - | - | - | - | - | NA      | NA | hypothetical protein AS852_02310                                     |
| AFR72366.1 | + | - | - | - | + | + | + | - | - | + | + | + | - | + | NA      | NA | putative phage protein                                               |
| APE87544.1 | - | - | - | + | - | - | - | - | - | - | - | - | - | - | COG4123 | J  | hypothetical protein AS852_02330                                     |
| APE87545.1 | - | - | - | + | - | - | - | - | - | - | - | - | - | - | COG2827 | L  | hypothetical protein AS852_02335                                     |
| APE87546.1 | - | - | - | + | - | - | - | - | - | - | - | - | - | - | COG0313 | J  | 16S rRNA (cytidine(1402)-2'-O)-methyltransferase                     |
| APE87547.1 | - | - | - | + | - | - | - | - | - | - | - | - | - | - | NA      | NA | hypothetical protein AS852_02345                                     |
| APE87548.1 | - | - | - | + | - | - | - | - | - | - | - | - | - | - | COG0073 | J  | methionine--tRNA ligase                                              |
| APE87549.1 | - | - | - | + | - | - | - | - | - | - | - | - | - | - | COG0084 | N  | hydrolase TatD                                                       |
| APE87550.1 | - | - | - | + | - | - | - | - | - | - | - | - | - | - | COG1658 | J  | ribonuclease M5                                                      |
| APE89768.1 | - | - | - | + | - | - | - | - | - | - | - | - | - | - | COG0030 | J  | 16S rRNA (adenine(1518)-N(6)/adenine(1519)-N(6))-dimethyltransferase |
| AFR72367.1 | + | - | - | - | + | + | + | - | - | + | + | + | - | + | NA      | NA | putative phage protein                                               |
| APE87551.1 | - | - | - | + | - | - | - | - | - | - | - | - | - | - | COG4466 | S  | hypothetical protein AS852_02370                                     |
| AFR72368.1 | + | - | + | - | + | + | + | - | - | + | + | + | - | + | NA      | NA | putative phage protein                                               |
| AFR72369.1 | + | - | - | - | + | + | + | - | - | + | + | + | - | + | NA      | NA | putative phage protein                                               |
| AFR72370.1 | + | - | - | - | + | + | + | - | - | + | + | + | - | + | NA      | NA | major tail protein                                                   |
| AFR72035.1 | + | - | + | - | - | + | - | + | - | - | + | - | + | + | COG0745 | TK | response regulator protein                                           |
| APE87872.1 | - | - | - | + | - | - | - | + | - | - | - | - | - | + | COG0778 | C  | nitroreductase                                                       |
| APE8873.1  | - | - | - | + | - | - | - | + | - | - | - | - | + | + | NA      | NA | autolysin                                                            |
| APE8875.1  | - | - | - | + | - | - | - | + | - | - | - | - | - | - | NA      | NA | phage tail protein                                                   |
| APE8876.1  | - | - | - | + | - | - | - | + | - | - | - | - | + | - | COG4193 | G  | cell wall hydrolase                                                  |
| APE8880.1  | - | - | - | + | - | - | + | + | - | - | - | - | + | - | NA      | NA | hypothetical protein AS852_09410                                     |
| APE8882.1  | - | - | - | + | - | - | - | + | + | - | - | - | + | - | NA      | NA | peptidase                                                            |
| APE8883.1  | - | - | - | + | - | - | + | + | - | - | - | - | - | - | NA      | NA | phage tail protein                                                   |
| APE8884.1  | - | - | - | + | - | - | + | + | - | - | - | - | + | - | NA      | NA | terminase                                                            |
| APE8885.1  | - | - | - | + | - | - | - | + | + | - | - | - | - | - | NA      | NA | hypothetical protein AS852_09435                                     |
| APE8886.1  | - | - | - | + | - | - | + | + | - | - | - | - | - | - | NA      | NA | hypothetical protein AS852_09440                                     |
| APE8887.1  | - | - | - | + | - | - | + | + | - | - | - | - | - | - | NA      | NA | phage tail protein                                                   |
| APE8888.1  | - | - | - | + | - | - | - | + | - | - | - | - | - | - | NA      | NA | hypothetical protein AS852_09450                                     |
| APE8889.1  | - | - | - | + | - | - | + | + | - | - | - | - | - | - | NA      | NA | hypothetical protein AS852_09455                                     |
| APE8890.1  | - | - | - | + | - | - | - | + | + | - | - | - | - | - | NA      | NA | phage head-tail adapter protein                                      |
| APE8891.1  | - | - | - | + | - | - | + | + | - | - | - | - | - | - | NA      | NA | phage head-tail adapter protein                                      |
| APE8892.1  | - | - | - | + | - | - | + | + | - | - | - | - | + | - | NA      | NA | major capsid protein                                                 |
| APE8893.1  | - | - | - | + | - | - | - | + | - | - | - | - | - | - | NA      | NA | hypothetical protein AS852_09475                                     |
| APE8894.1  | - | - | - | + | - | - | + | - | - | - | - | - | - | - | NA      | NA | hypothetical protein AS852_09480                                     |
| APE8895.1  | - | - | - | + | - | - | + | + | - | - | - | - | - | - | NA      | NA | phage head morphogenesis protein                                     |
| APE8896.1  | - | - | - | + | - | - | - | + | - | - | - | - | + | - | NA      | NA | phage portal protein                                                 |
| APE8897.1  | - | - | - | + | - | - | + | + | - | - | - | - | - | - | NA      | NA | terminase                                                            |
| APE8898.1  | - | - | - | + | - | - | + | + | - | - | - | - | - | - | NA      | NA | terminase                                                            |
| APE8899.1  | - | - | - | + | + | + | - | - | - | - | + | + | - | - | NA      | NA | hypothetical protein AS852_09505                                     |
| APE8900.1  | - | - | - | + | - | - | + | + | - | - | - | - | - | - | NA      | NA | hypothetical protein AS852_09510                                     |
| APE8901.1  | - | - | - | + | - | - | - | + | - | - | - | - | - | - | NA      | NA | hypothetical protein AS852_09515                                     |
| APE8906.1  | - | - | - | + | + | + | + | - | + | + | + | + | + | + | NA      | NA | dUTPase                                                              |
| AFR72036.1 | + | - | + | - | - | + | - | + | - | - | + | - | + | + | COG5002 | T  | sensor kinase protein                                                |

| Source                                                | Target                           | Distance | Group |
|-------------------------------------------------------|----------------------------------|----------|-------|
| <i>Borrelia burgdorferi</i>                           | <i>Staphylococcus aureus</i> LA* | 7.51763  | I     |
| <i>Clostridium botulinum</i>                          | <i>Staphylococcus aureus</i> LA* | 8.32624  | I     |
| <i>Borrelia afzelii</i>                               | <i>Staphylococcus aureus</i> LA* | 8.60591  | I     |
| <i>Clostridium tetani</i>                             | <i>Staphylococcus aureus</i> LA* | 9.93434  | I     |
| <i>Rickettsia africae</i>                             | <i>Staphylococcus aureus</i> LA* | 10.1228  | I     |
| <i>Rickettsia akari</i>                               | <i>Staphylococcus aureus</i> LA* | 10.3842  | I     |
| <i>Mycoplasma hyorhinis</i>                           | <i>Staphylococcus aureus</i> LA* | 10.6426  | I     |
| <i>Anaerococcus prevotii</i>                          | <i>Staphylococcus aureus</i> LA* | 10.9594  | I     |
| <i>Finegoldia magna</i>                               | <i>Staphylococcus aureus</i> LA* | 11.0287  | I     |
| <i>Rickettsia prowazekii</i>                          | <i>Staphylococcus aureus</i> LA* | 11.0743  | I     |
| <i>Rickettsia heilongjiangensis</i>                   | <i>Staphylococcus aureus</i> LA* | 11.3296  | I     |
| <i>Rickettsia felis</i>                               | <i>Staphylococcus aureus</i> LA* | 11.3418  | I     |
| <i>Rickettsia japonica</i>                            | <i>Staphylococcus aureus</i> LA* | 11.3844  | I     |
| <i>Rickettsia philipii</i>                            | <i>Staphylococcus aureus</i> LA* | 11.5516  | I     |
| <i>Rickettsia canadensis</i>                          | <i>Staphylococcus aureus</i> LA* | 11.5637  | I     |
| <i>Melissococcus plutonius</i>                        | <i>Staphylococcus aureus</i> LA* | 11.5759  | I     |
| <i>Rickettsia conorii</i>                             | <i>Staphylococcus aureus</i> LA* | 11.582   | I     |
| <i>Rickettsia rickettsii</i>                          | <i>Staphylococcus aureus</i> LA* | 11.5911  | I     |
| <i>Clostridium saccharoperbutylacetonicum</i>         | <i>Staphylococcus aureus</i> LA* | 11.6458  | I     |
| <i>Mycoplasma mycoides</i> subsp. <i>mycoides</i>     | <i>Staphylococcus aureus</i> LA* | 11.6473  | I     |
| <i>Brachyspira pilosicoli</i>                         | <i>Staphylococcus aureus</i> LA* | 11.6488  | I     |
| <i>Rickettsia typhi</i>                               | <i>Staphylococcus aureus</i> LA* | 11.6701  | I     |
| <i>Mycoplasma leachii</i>                             | <i>Staphylococcus aureus</i> LA* | 11.7461  | I     |
| <i>Rickettsia australis</i>                           | <i>Staphylococcus aureus</i> LA* | 11.8191  | I     |
| <i>Mycoplasma capricolum</i> subsp. <i>capricolum</i> | <i>Staphylococcus aureus</i> LA* | 11.8616  | I     |
| <i>Rickettsia peacockii</i>                           | <i>Staphylococcus aureus</i> LA* | 11.9022  | I     |
| <i>Bacillus cereus</i>                                | <i>Staphylococcus aureus</i> LA* | 11.9376  | I     |
| <i>Acinetobacter baumannii</i>                        | <i>Staphylococcus aureus</i> LA* | 12.0547  | I     |
| <i>Rickettsia slovaca</i>                             | <i>Staphylococcus aureus</i> LA* | 12.0623  | I     |
| <i>Rickettsia bellii</i>                              | <i>Staphylococcus aureus</i> LA* | 12.0957  | I     |
| <i>Ureaplasma parvum</i>                              | <i>Staphylococcus aureus</i> LA* | 12.2051  | I     |
| <i>Mycoplasma bovis</i>                               | <i>Staphylococcus aureus</i> LA* | 12.2355  | II    |
| <i>Rickettsia rhipicephali</i>                        | <i>Staphylococcus aureus</i> LA* | 12.2659  | II    |
| <i>Rickettsia massiliae</i>                           | <i>Staphylococcus aureus</i> LA* | 12.2842  | II    |
| <i>Brachyspira murdochi</i>                           | <i>Staphylococcus aureus</i> LA* | 12.2902  | II    |
| <i>Mycoplasma hominis</i>                             | <i>Staphylococcus aureus</i> LA* | 12.3043  | II    |
| <i>Mycoplasma cynos</i>                               | <i>Staphylococcus aureus</i> LA* | 12.3085  | II    |
| <i>Borrelia bissettii</i>                             | <i>Staphylococcus aureus</i> LA* | 12.3814  | II    |
| <i>Brachyspira hyodysenteriae</i>                     | <i>Staphylococcus aureus</i> LA* | 12.4027  | II    |
| <i>Borrelia garinii</i>                               | <i>Staphylococcus aureus</i> LA* | 12.4554  | II    |
| <i>Ureaplasma urealyticum</i>                         | <i>Staphylococcus aureus</i> LA* | 12.4696  | II    |
| <i>Arcobacter nitrofigilis</i>                        | <i>Staphylococcus aureus</i> LA* | 12.6246  | II    |
| <i>Mycoplasma crocodyli</i>                           | <i>Staphylococcus aureus</i> LA* | 12.6297  | II    |
| <i>Brachyspira intermedia</i>                         | <i>Staphylococcus aureus</i> LA* | 12.7857  | II    |

|                                                            |                                  |         |    |
|------------------------------------------------------------|----------------------------------|---------|----|
| <i>Mycoplasma fermentans</i>                               | <i>Staphylococcus aureus</i> LA* | 12.8003 | II |
| <i>Bacteroides fragilis</i>                                | <i>Staphylococcus aureus</i> LA* | 12.8055 | II |
| <i>Bacillus thuringiensis</i>                              | <i>Staphylococcus aureus</i> LA* | 12.8192 | II |
| <i>Rickettsia parkeri</i>                                  | <i>Staphylococcus aureus</i> LA* | 12.8496 | II |
| <i>Brachyspira pilosicoli</i>                              | <i>Staphylococcus aureus</i> LA* | 12.9165 | II |
| <i>Mycoplasma penetrans</i>                                | <i>Staphylococcus aureus</i> LA* | 13.0269 | II |
| <i>Methanosphaera stadtmanae</i>                           | <i>Staphylococcus aureus</i> LA* | 13.0441 | II |
| <i>Arcobacter butzleri</i>                                 | <i>Staphylococcus aureus</i> LA* | 13.0563 | II |
| <i>Campylobacter jejuni</i> subsp. <i>jejuni</i>           | <i>Staphylococcus aureus</i> LA* | 13.0563 | II |
| <i>Mycoplasma conjunctivae</i>                             | <i>Staphylococcus aureus</i> LA* | 13.1723 | II |
| <i>Lysinibacillus sphaericus</i>                           | <i>Staphylococcus aureus</i> LA* | 13.2174 | II |
| <i>Mycoplasma arthritidis</i>                              | <i>Staphylococcus aureus</i> LA* | 13.2554 | II |
| <i>Arcobacter</i> sp.                                      | <i>Staphylococcus aureus</i> LA* | 13.2964 | II |
| <i>Rickettsia montanensis</i>                              | <i>Staphylococcus aureus</i> LA* | 13.5771 | II |
| <i>Lactobacillus salivarius</i>                            | <i>Staphylococcus aureus</i> LA* | 13.7372 | II |
| <i>Mycoplasma agalactiae</i>                               | <i>Staphylococcus aureus</i> LA* | 13.8436 | II |
| <i>Orientia tsutsugamushi</i>                              | <i>Staphylococcus aureus</i> LA* | 13.8588 | II |
| <i>Mesoplasma florum</i>                                   | <i>Staphylococcus aureus</i> LA* | 13.9014 | II |
| <i>Francisella tularensis</i>                              | <i>Staphylococcus aureus</i> LA* | 13.9652 | II |
| <i>Campylobacter lari</i>                                  | <i>Staphylococcus aureus</i> LA* | 14.0412 | II |
| <i>Mycoplasma hyopneumoniae</i>                            | <i>Staphylococcus aureus</i> LA* | 14.2373 | II |
| <i>Bacillus anthracis</i>                                  | <i>Staphylococcus aureus</i> LA* | 14.3981 | II |
| <i>Mycoplasma suis</i>                                     | <i>Staphylococcus aureus</i> LA* | 14.5805 | II |
| <i>Mycoplasma gallisepticum</i>                            | <i>Staphylococcus aureus</i> LA* | 14.6705 | II |
| <i>Campylobacter hominis</i>                               | <i>Staphylococcus aureus</i> LA* | 14.9501 | II |
| <i>Ehrlichia ruminantium</i>                               | <i>Staphylococcus aureus</i> LA* | 15.0292 | II |
| <i>Leptospira interrogans</i>                              | <i>Staphylococcus aureus</i> LA* | 15.0687 | II |
| <i>Clostridium novyi</i>                                   | <i>Staphylococcus aureus</i> LA* | 15.1325 | II |
| <i>Clostridium perfringens</i>                             | <i>Staphylococcus aureus</i> LA* | 15.4517 | II |
| <i>Flavobacterium branchiophilum</i>                       | <i>Staphylococcus aureus</i> LA* | 15.5622 | II |
| <i>Francisella</i> sp.                                     | <i>Staphylococcus aureus</i> LA* | 15.5916 | II |
| <i>Methanobrevibacter smithii</i>                          | <i>Staphylococcus aureus</i> LA* | 15.6955 | II |
| <i>Clostridium beijerinckii</i>                            | <i>Staphylococcus aureus</i> LA* | 15.8074 | II |
| <i>Butyrivibrio proteoclasticus</i>                        | <i>Staphylococcus aureus</i> LA* | 15.8196 | II |
| <i>Eubacterium eligens</i>                                 | <i>Staphylococcus aureus</i> LA* | 15.853  | II |
| <i>Bacillus weihenstephanensis</i>                         | <i>Staphylococcus aureus</i> LA* | 15.8682 | II |
| <i>Acidianus hospitalis</i>                                | <i>Staphylococcus aureus</i> LA* | 15.8864 | II |
| <i>Clostridium difficile</i>                               | <i>Staphylococcus aureus</i> LA* | 15.9807 | II |
| <i>Acholeplasma laidlawii</i>                              | <i>Staphylococcus aureus</i> LA* | 15.9898 | II |
| <i>Campylobacter fetus</i> subsp. <i>fetus</i>             | <i>Staphylococcus aureus</i> LA* | 15.9924 | II |
| <i>Fusobacterium nucleatum</i> subsp. <i>nucleatum</i>     | <i>Staphylococcus aureus</i> LA* | 16.1296 | II |
| <i>Borrelia duttonii</i>                                   | <i>Staphylococcus aureus</i> LA* | 16.2056 | II |
| <i>Bacillus megaterium</i>                                 | <i>Staphylococcus aureus</i> LA* | 16.3059 | II |
| <i>Francisella philomiragia</i> subsp. <i>philomiragia</i> | <i>Staphylococcus aureus</i> LA* | 16.3272 | II |

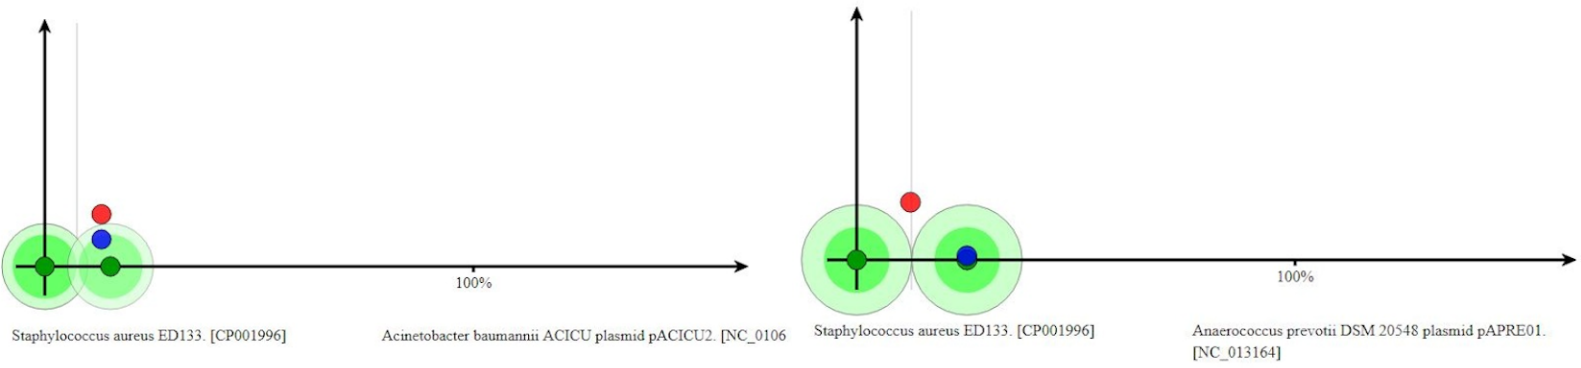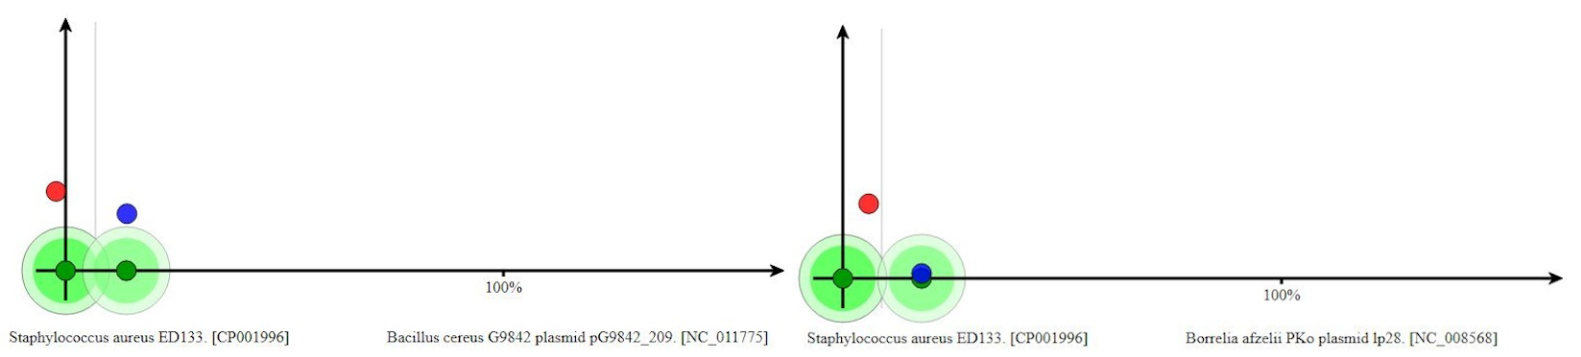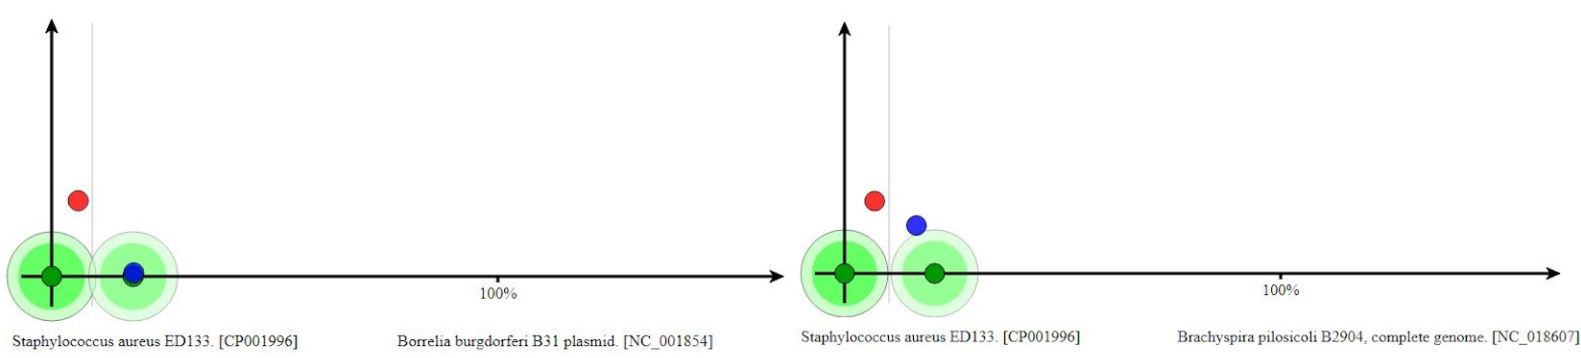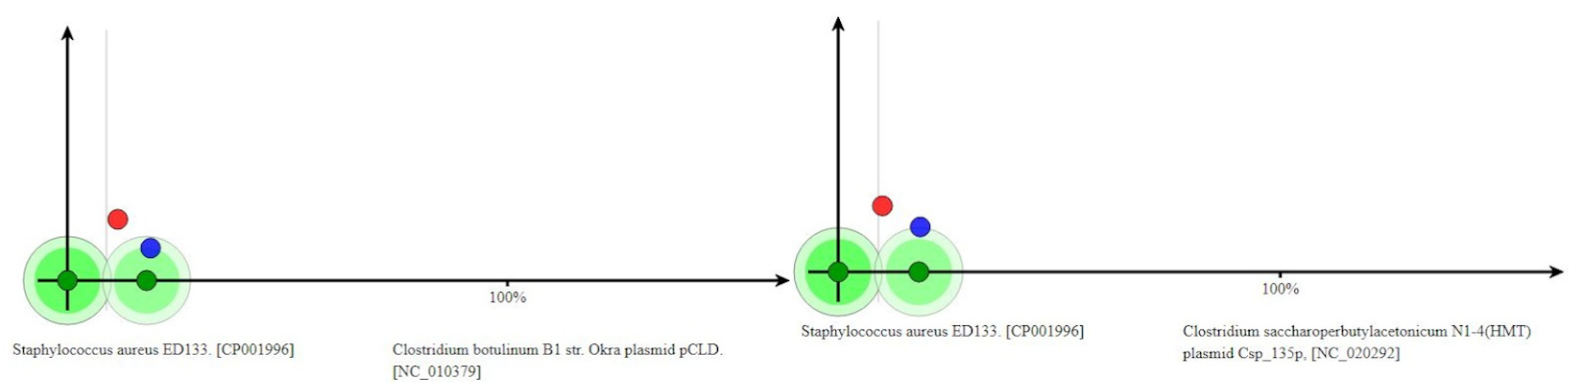

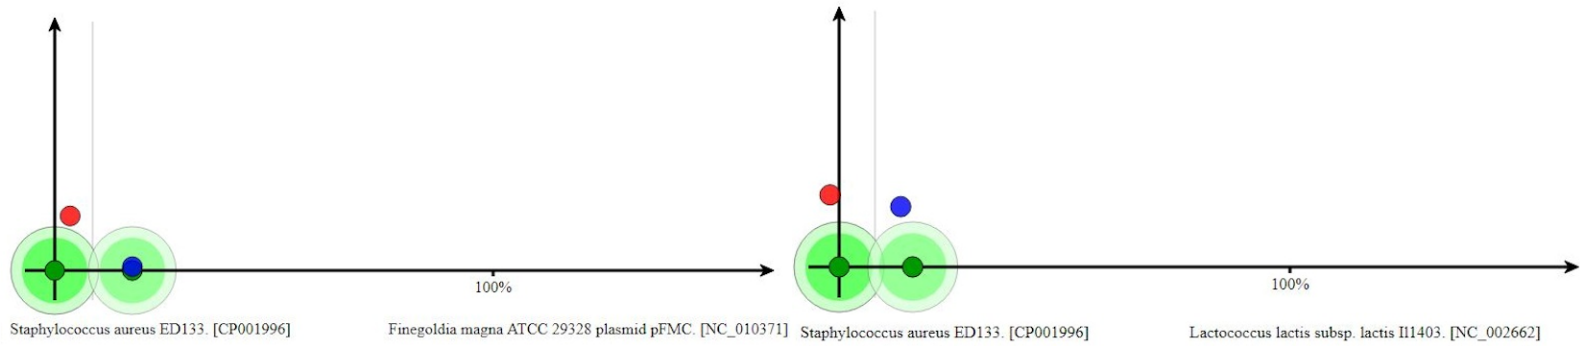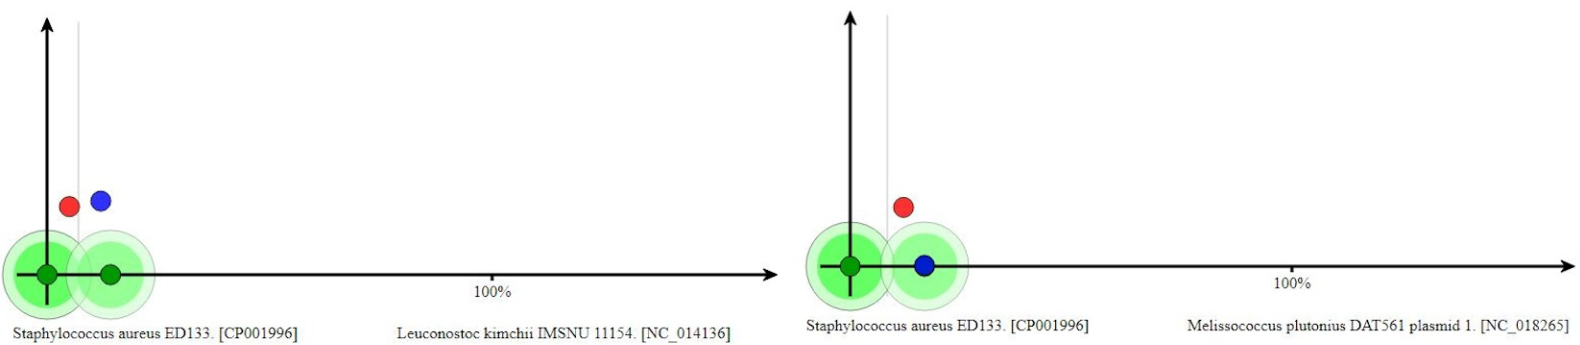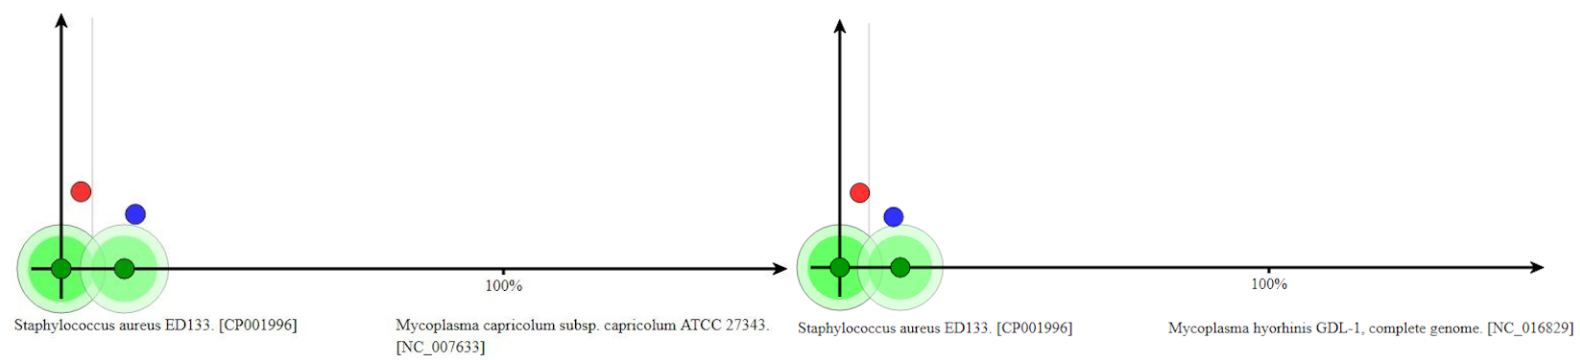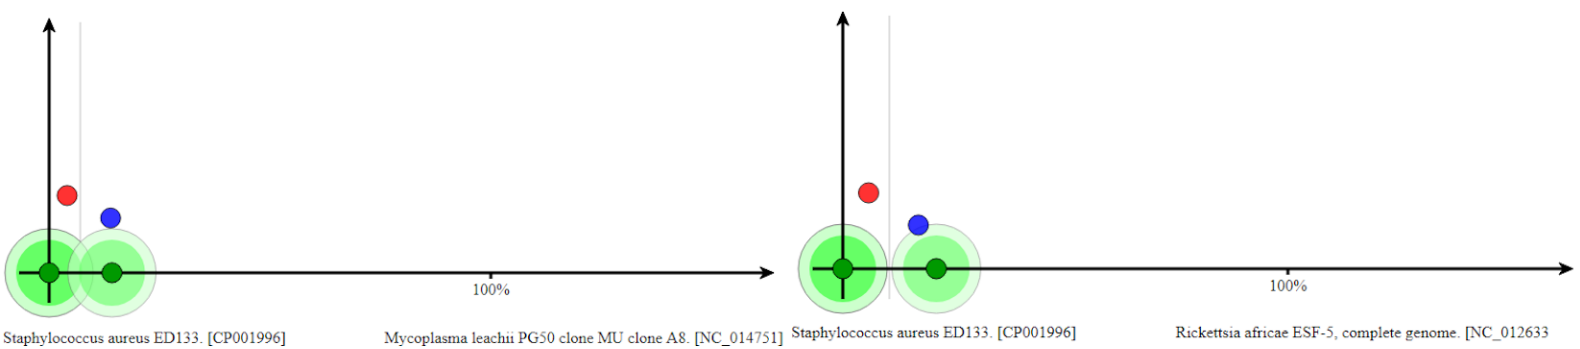



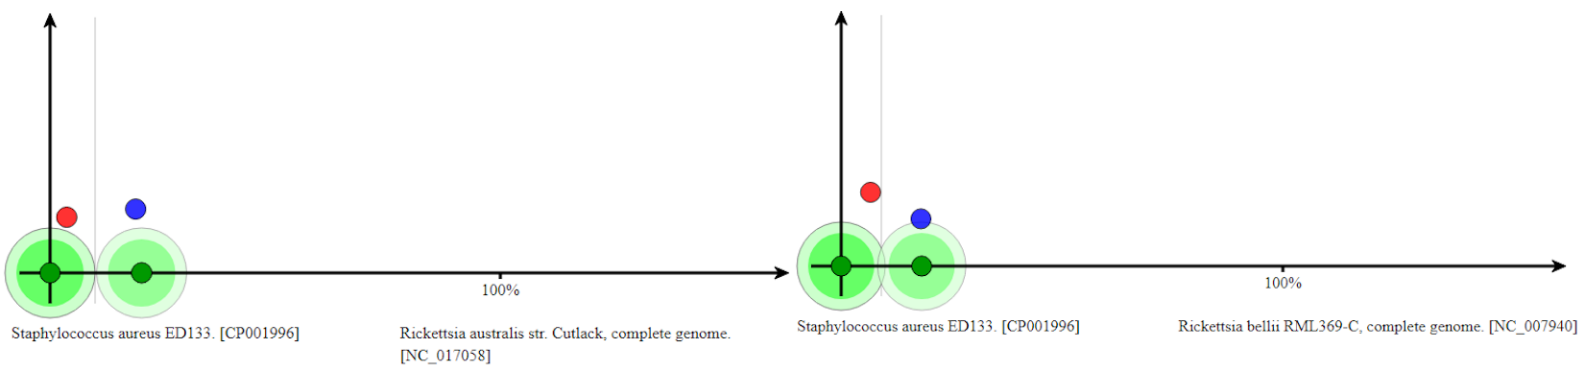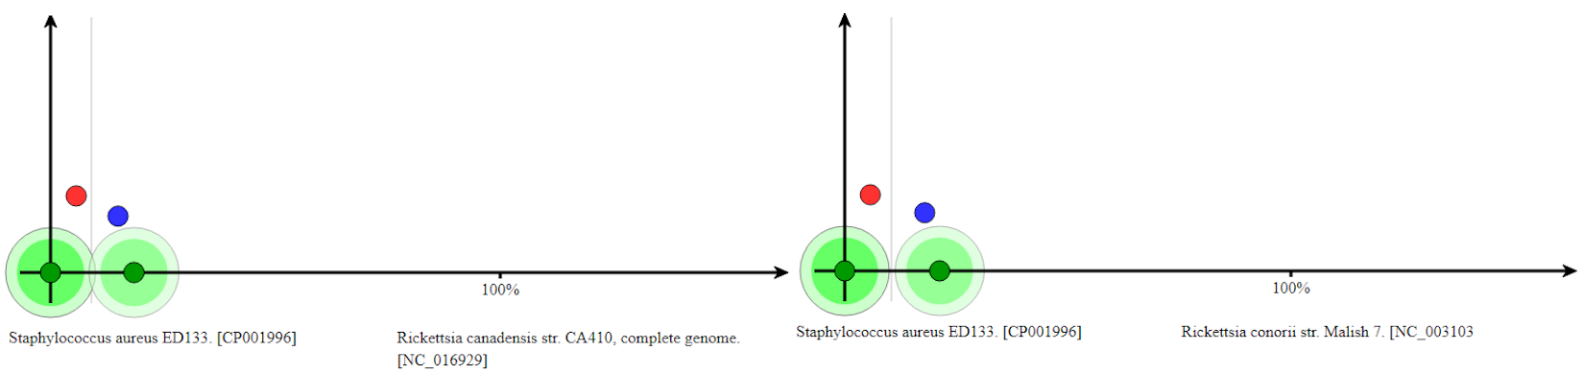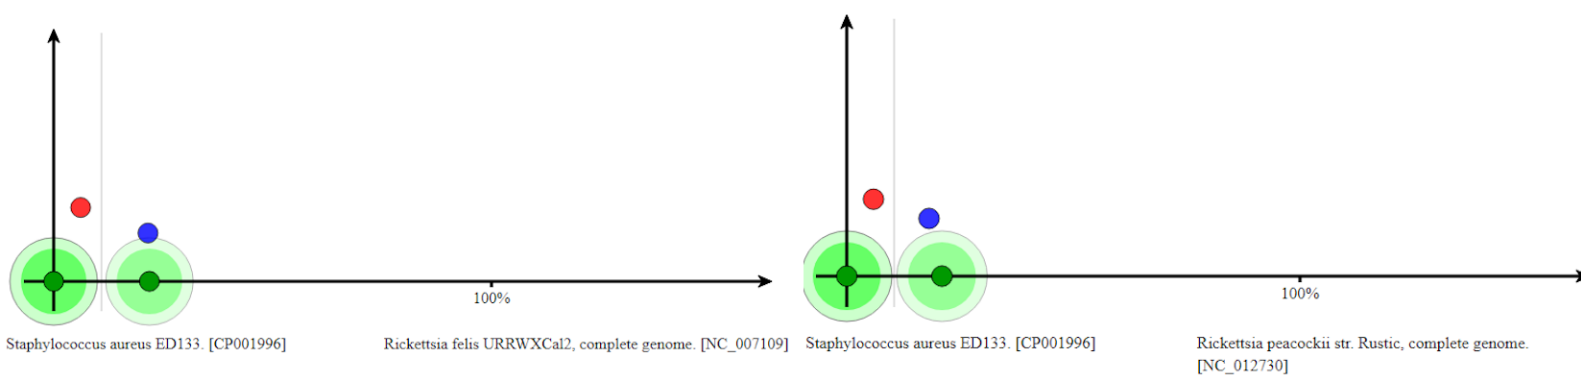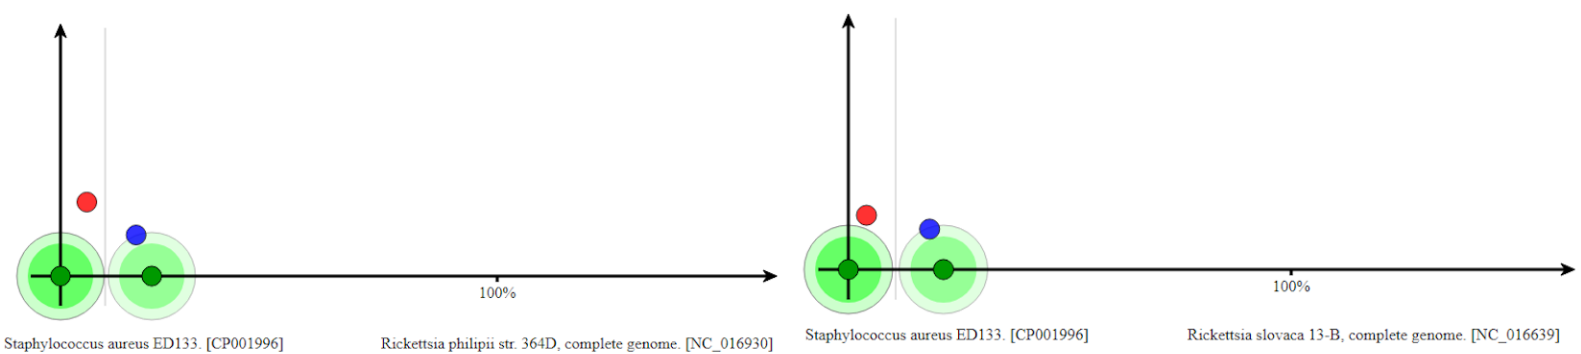

**SUPPLEMENTARY DATA.** These figures depicts the proposed GI donor-recipient relationship with the aid of Lingvocom 2D projection utility. Two dark green spots on the plots represent OUP of *S. aureus* ED133 (at centre point) and proposed donors (on principal axis). Light green circle depicts 1/2 of the distance between patterns calculated for chromosomes/plasmids. The island of *S. aureus* is shown as a red small circle and that of other donors as a blue circle. Islands were plotted along the second principal axis according to distance values between OUP of islands and host chromosome.
